# Supplementary material
Source: publisher figshare collection journal article supplement (https://acs.figshare.com/ndownloader/files/5067871)
Supplement: Supplementary file 1 [file 5067871]

data_General 
_audit_creation_date                  'Fri Aug 26 21:28:35 2005'
_audit_creation_method                'by teXsan'
_audit_update_record                   ?
#------------------------------------------------------------------------------
data_compound 2a / 7
#------------------------------------------------------------------------------
# CHEMICAL DATA 
_chemical_formula_sum                  'C51 H36 B2 Cl2 F8 N6 O9 P2 Rh4 '
_chemical_formula_moiety               'C51 H36 B2 Cl2 F8 N6 O9 P2 Rh4 '
_chemical_formula_weight               1594.96
_chemical_melting_point                ?
#------------------------------------------------------------------------------
# CRYSTAL DATA 
_symmetry_cell_setting                 triclinic
_symmetry_space_group_name_H-M        'P -1         '
_symmetry_Int_Tables_number            2
loop_
_symmetry_equiv_pos_as_xyz
x,y,z
-x,-y,-z
_cell_length_a                         9.990(4)
_cell_length_b                         13.054(3)
_cell_length_c                         22.616(8)
_cell_angle_alpha                      90.35(2)
_cell_angle_beta                       99.879(7)
_cell_angle_gamma                      96.11(2)
_cell_volume                           2888(1)
_cell_formula_units_Z                  2
_cell_measurement_reflns_used          8677
_cell_measurement_theta_min            3.0
_cell_measurement_theta_max            27.5
_cell_measurement_temperature          213
#------------------------------------------------------------------------------
_exptl_crystal_description            'unknown'
_exptl_crystal_colour                 'unknown'
_exptl_crystal_size_max                0.100
_exptl_crystal_size_mid                0.100
_exptl_crystal_size_min                0.100
_exptl_crystal_size_rad                ?
_exptl_crystal_density_diffrn          1.834
_exptl_crystal_density_meas            ?
_exptl_crystal_density_method         'not measured'
_exptl_absorpt_coefficient_mu          1.353
_exptl_absorpt_correction_type         multi-scan
_exptl_absorpt_process_details        '(Higashi, 1995)'
_exptl_absorpt_correction_T_min        0.300
_exptl_absorpt_correction_T_max        0.873
#------------------------------------------------------------------------------
# EXPERIMENTAL DATA 
_diffrn_ambient_temperature            213
_diffrn_radiation_type                'Mo K\a'
_diffrn_radiation_wavelength           0.7107
_diffrn_measurement_device_type       'Rigaku RAXIS-IV Imaging Plate'
_diffrn_measurement_method             \w
_diffrn_detector_area_resol_mean       10.00
_diffrn_reflns_number                  19839
_diffrn_reflns_av_R_equivalents        0.081
_diffrn_reflns_theta_min               ?
_diffrn_reflns_theta_max               27.48
_diffrn_reflns_limit_h_min             -12
_diffrn_reflns_limit_h_max             12
_diffrn_reflns_limit_k_min             -15
_diffrn_reflns_limit_k_max             15
_diffrn_reflns_limit_l_min             -28
_diffrn_reflns_limit_l_max             28
#------------------------------------------------------------------------------
# REFINEMENT DATA 
_refine_special_details
;
Refinement using reflections with F^2^ > -10.0 sigma(F^2^). The weighted 
R-factor (wR) and goodness of fit (S) are based on F^2^. R-factor (gt) are 
based on F. The threshold expression of F^2^ > 2.0 sigma(F^2^) is used only 
for calculating R-factor (gt).
;
_reflns_number_total                   11387
_reflns_number_gt                      6774
_reflns_threshold_expression                >2.0sigma(I)
_refine_ls_structure_factor_coef            Fsqd
_refine_ls_R_factor_gt                 0.0866
_refine_ls_wR_factor_ref               0.2329
_refine_ls_hydrogen_treatment          noref
_refine_ls_number_reflns               6774
_refine_ls_number_parameters           757
_refine_ls_goodness_of_fit_ref         1.247
_refine_ls_weighting_scheme            calc
_refine_ls_weighting_details               
   'w = 1/[\s^2^(Fo^2^) + (0.1000P)^2^+0.0000P] where P=(Fo^2^+2Fc^2^)/3'
_refine_ls_shift/su_max                -0.0010
_refine_ls_extinction_method           SHELXL
_refine_ls_extinction_coef             0.0000
_refine_ls_extinction_expression
 'Fc^*^=kFc[1+0.001xFc^2^\l^3^/sin(2\q)]^-1/4^'
_refine_diff_density_max               3.40
_refine_diff_density_min               -3.26
loop_
_atom_type_symbol
_atom_type_description
_atom_type_scat_dispersion_real
_atom_type_scat_dispersion_imag
_atom_type_scat_source
  'C' 'C'  0.003 0.002 
;International Tables for Crystallography
(1992, Vol. C, Tables 4.2.6.8 and 6.1.1.4)
;
  'H' 'H'  0.000 0.000 
;International Tables for Crystallography
(1992, Vol. C, Table 6.1.1.4)
;
  'O' 'O'  0.011 0.006 
;International Tables for Crystallography
(1992, Vol. C, Tables 4.2.6.8 and 6.1.1.4)
;
  'N' 'N'  0.006 0.003 
;International Tables for Crystallography
(1992, Vol. C, Tables 4.2.6.8 and 6.1.1.4)
;
  'B' 'B'  0.001 0.001 
;International Tables for Crystallography
(1992, Vol. C, Tables 4.2.6.8 and 6.1.1.4)
;
  'F' 'F'  0.017 0.010 
;International Tables for Crystallography
(1992, Vol. C, Tables 4.2.6.8 and 6.1.1.4)
;
  'P' 'P'  0.102 0.094 
;International Tables for Crystallography
(1992, Vol. C, Tables 4.2.6.8 and 6.1.1.4)
;
  'Cl' 'Cl'  0.148 0.159 
;International Tables for Crystallography
(1992, Vol. C, Tables 4.2.6.8 and 6.1.1.4)
;
  'Rh' 'Rh'  -1.118 0.919 
;International Tables for Crystallography
(1992, Vol. C, Tables 4.2.6.8 and 6.1.1.4)
;
#------------------------------------------------------------------------------
# ATOMIC COORDINATES AND DISPLACEMENT PARAMETERS 
loop_
_atom_site_label
_atom_site_type_symbol
_atom_site_fract_x
_atom_site_fract_y
_atom_site_fract_z
_atom_site_U_iso_or_equiv
_atom_site_adp_type
_atom_site_occupancy
_atom_site_calc_flag
_atom_site_refinement_flags
_atom_site_disorder_assembly
_atom_site_disorder_group
 Rh(1)  Rh -0.35815(9) -0.08771(6) 0.33583(3)  0.0428(2)   Uani 1.00 d . . .
 Rh(2)  Rh -0.12363(9) 0.07720(6)  0.48837(3)  0.0404(2)   Uani 1.00 d . . .
 Rh(3)  Rh 0.1372(1)   0.19700(7)  0.07466(4)  0.0566(3)   Uani 1.00 d . . .
 Rh(4)  Rh -0.25050(9) 0.16314(6)  0.12139(4)  0.0508(2)   Uani 1.00 d . . .
 Cl(1)  Cl 0.8451(5)   0.4025(4)   0.4879(2)   0.111(1)    Uani 1.00 d . . .
 Cl(2)  Cl 0.6124(5)   0.2626(3)   0.5056(3)   0.127(2)    Uani 1.00 d . . .
 P(1)   P  -0.2517(3)  -0.1616(2)  0.2658(1)   0.0414(6)   Uani 1.00 d . . .
 P(2)   P  0.3062(3)   0.4046(2)   0.1234(1)   0.0501(7)   Uani 1.00 d . . .
 F(1)   F  0.4690(10)  0.5148(7)   0.3000(3)   0.095(3)    Uani 1.00 d . . .
 F(2)   F  0.5055(9)   0.5151(9)   0.4008(3)   0.117(4)    Uani 1.00 d . . .
 F(3)   F  0.430(1)    0.3712(7)   0.3484(4)   0.119(3)    Uani 1.00 d . . .
 F(4)   F  0.2933(8)   0.4913(7)   0.3503(4)   0.092(3)    Uani 1.00 d . . .
 F(5)   F  0.3171(9)   0.0172(7)   0.1723(4)   0.093(3)    Uani 1.00 d . . .
 F(6)   F  0.157(2)    0.0723(9)   0.2145(4)   0.163(6)    Uani 1.00 d . . .
 F(7)   F  0.176(1)    -0.0872(7)  0.2151(5)   0.133(4)    Uani 1.00 d . . .
 F(8)   F  0.332(1)    0.011(1)    0.2710(5)   0.199(7)    Uani 1.00 d . . .
 O(1)   O  0.2371(9)   0.3417(6)   0.0672(3)   0.064(2)    Uani 1.00 d . . .
 O(01A) O  -0.608(1)   -0.2392(7)  0.3079(4)   0.084(3)    Uani 1.00 d . . .
 O(01B) O  0.246(1)    0.1197(10)  -0.0313(5)  0.104(4)    Uani 1.00 d . . .
 O(02A) O  -0.521(1)   0.0545(8)   0.3964(4)   0.079(3)    Uani 1.00 d . . .
 O(02B) O  0.023(1)    -0.0177(8)  0.0858(4)   0.079(3)    Uani 1.00 d . . .
 O(03A) O  -0.3500(9)  -0.0876(6)  0.4966(3)   0.063(2)    Uani 1.00 d . . .
 O(03B) O  -0.198(1)   0.1341(8)   -0.0040(4)  0.088(3)    Uani 1.00 d . . .
 O(04A) O  -0.146(1)   0.1244(7)   0.6168(3)   0.081(3)    Uani 1.00 d . . .
 O(04B) O  -0.531(1)   0.0662(9)   0.0673(4)   0.100(4)    Uani 1.00 d . . .
 N(1A)  N  -0.1696(8)  0.0020(5)   0.3517(3)   0.038(2)    Uani 1.00 d . . .
 N(1B)  N  0.0626(9)   0.2549(6)   0.1480(4)   0.047(2)    Uani 1.00 d . . .
 N(2A)  N  -0.1119(9)  0.0664(6)   0.3981(3)   0.041(2)    Uani 1.00 d . . .
 N(2B)  N  -0.0613(10) 0.2286(6)   0.1634(4)   0.048(2)    Uani 1.00 d . . .
 N(3A)  N  0.0415(9)   0.1882(6)   0.4824(3)   0.042(2)    Uani 1.00 d . . .
 N(3B)  N  -0.2937(9)  0.1954(6)   0.2078(4)   0.050(2)    Uani 1.00 d . . .
 C(01A) C  -0.516(1)   -0.181(1)   0.3178(5)   0.063(3)    Uani 1.00 d . . .
 C(01B) C  0.205(1)    0.151(1)    0.0092(6)   0.072(4)    Uani 1.00 d . . .
 C(02A) C  -0.455(1)   0.0012(10)  0.3775(4)   0.056(3)    Uani 1.00 d . . .
 C(02B) C  0.064(1)    0.0641(10)  0.0816(5)   0.058(3)    Uani 1.00 d . . .
 C(03A) C  -0.265(1)   -0.0232(9)  0.4919(4)   0.051(3)    Uani 1.00 d . . .
 C(03B) C  -0.213(1)   0.1448(9)   0.0448(6)   0.062(3)    Uani 1.00 d . . .
 C(04A) C  -0.133(1)   0.1045(8)   0.5682(5)   0.061(3)    Uani 1.00 d . . .
 C(04B) C  -0.426(1)   0.106(1)    0.0889(5)   0.069(3)    Uani 1.00 d . . .
 C(11A) C  -0.091(1)   0.0118(7)   0.3076(4)   0.037(2)    Uani 1.00 d . . .
 C(11B) C  0.144(1)    0.3089(8)   0.1944(5)   0.052(3)    Uani 1.00 d . . .
 C(12A) C  0.022(1)    0.0856(7)   0.3274(4)   0.044(2)    Uani 1.00 d . . .
 C(12B) C  0.068(1)    0.3218(8)   0.2395(4)   0.052(3)    Uani 1.00 d . . .
 C(13A) C  0.002(1)    0.1181(7)   0.3839(4)   0.038(2)    Uani 1.00 d . . .
 C(13B) C  -0.060(1)   0.2713(8)   0.2201(5)   0.050(3)    Uani 1.00 d . . .
 C(14A) C  -0.132(1)   -0.0505(8)  0.2518(4)   0.043(2)    Uani 1.00 d . . .
 C(14B) C  0.290(1)    0.3436(8)   0.1929(5)   0.054(3)    Uani 1.00 d . . .
 C(21A) C  0.0826(10)  0.1911(8)   0.4283(4)   0.041(2)    Uani 1.00 d . . .
 C(21B) C  -0.184(1)   0.2513(8)   0.2445(4)   0.049(3)    Uani 1.00 d . . .
 C(22A) C  0.194(1)    0.2555(7)   0.4176(4)   0.047(3)    Uani 1.00 d . . .
 C(22B) C  -0.197(1)   0.2847(9)   0.3008(5)   0.056(3)    Uani 1.00 d . . .
 C(23A) C  0.267(1)    0.3223(8)   0.4650(5)   0.055(3)    Uani 1.00 d . . .
 C(23B) C  -0.318(2)   0.2634(10)  0.3204(5)   0.067(3)    Uani 1.00 d . . .
 C(24A) C  0.225(1)    0.3165(9)   0.5185(5)   0.061(3)    Uani 1.00 d . . .
 C(24B) C  -0.427(1)   0.2046(9)   0.2846(5)   0.063(3)    Uani 1.00 d . . .
 C(25A) C  0.112(1)    0.2522(8)   0.5275(5)   0.051(3)    Uani 1.00 d . . .
 C(25B) C  -0.407(1)   0.1746(9)   0.2279(5)   0.054(3)    Uani 1.00 d . . .
 C(31A) C  -0.351(1)   -0.1990(7)  0.1942(4)   0.045(2)    Uani 1.00 d . . .
 C(31B) C  0.488(1)    0.4258(8)   0.1225(4)   0.049(3)    Uani 1.00 d . . .
 C(32A) C  -0.317(1)   -0.2739(8)  0.1579(5)   0.057(3)    Uani 1.00 d . . .
 C(32B) C  0.533(1)    0.4090(8)   0.0673(4)   0.054(3)    Uani 1.00 d . . .
 C(33A) C  -0.396(2)   -0.2998(9)  0.1016(5)   0.070(4)    Uani 1.00 d . . .
 C(33B) C  0.669(2)    0.423(1)    0.0652(6)   0.072(4)    Uani 1.00 d . . .
 C(34A) C  -0.508(1)   -0.2494(9)  0.0815(4)   0.066(4)    Uani 1.00 d . . .
 C(34B) C  0.762(1)    0.4485(10)  0.1172(6)   0.068(3)    Uani 1.00 d . . .
 C(35A) C  -0.545(1)   -0.1741(9)  0.1161(5)   0.065(3)    Uani 1.00 d . . .
 C(35B) C  0.721(1)    0.4660(8)   0.1712(5)   0.052(3)    Uani 1.00 d . . .
 C(36A) C  -0.463(1)   -0.1506(8)  0.1723(4)   0.056(3)    Uani 1.00 d . . .
 C(36B) C  0.580(1)    0.4511(9)   0.1741(4)   0.057(3)    Uani 1.00 d . . .
 C(41A) C  -0.157(1)   -0.2682(7)  0.2915(4)   0.041(2)    Uani 1.00 d . . .
 C(41B) C  0.233(1)    0.5235(8)   0.1227(4)   0.050(3)    Uani 1.00 d . . .
 C(42A) C  -0.228(1)   -0.3501(9)  0.3166(4)   0.051(3)    Uani 1.00 d . . .
 C(42B) C  0.260(1)    0.593(1)    0.1709(5)   0.069(4)    Uani 1.00 d . . .
 C(43A) C  -0.161(1)   -0.4328(9)  0.3387(5)   0.061(3)    Uani 1.00 d . . .
 C(43B) C  0.200(2)    0.684(1)    0.1674(6)   0.074(4)    Uani 1.00 d . . .
 C(44A) C  -0.028(1)   -0.4353(8)  0.3354(4)   0.057(3)    Uani 1.00 d . . .
 C(44B) C  0.109(2)    0.704(1)    0.1190(7)   0.077(4)    Uani 1.00 d . . .
 C(45A) C  0.043(1)    -0.355(1)   0.3095(6)   0.069(4)    Uani 1.00 d . . .
 C(45B) C  0.073(1)    0.635(1)    0.0704(6)   0.076(4)    Uani 1.00 d . . .
 C(46A) C  -0.023(1)   -0.2716(9)  0.2867(5)   0.059(3)    Uani 1.00 d . . .
 C(46B) C  0.137(1)    0.5444(10)  0.0719(5)   0.063(3)    Uani 1.00 d . . .
 C(51)  C  0.688(2)    0.389(1)    0.5130(7)   0.089(5)    Uani 1.00 d . . .
 B(1)   B  0.428(1)    0.477(1)    0.3506(5)   0.053(3)    Uani 1.00 d . . .
 B(2)   B  0.247(1)    0.008(1)    0.2192(6)   0.053(3)    Uani 1.00 d . . .
 H(1)   H  0.0969      0.1092      0.3065      0.0528      Uiso 1.00 calc . . .
 H(2)   H  -0.0523     -0.0750     0.2391      0.0513      Uiso 1.00 calc . . .
 H(3)   H  -0.1737     -0.0107     0.2197      0.0513      Uiso 1.00 calc . . .
 H(4)   H  0.2210      0.2544      0.3783      0.0570      Uiso 1.00 calc . . .
 H(5)   H  0.3437      0.3711      0.4585      0.0639      Uiso 1.00 calc . . .
 H(6)   H  0.2774      0.3583      0.5514      0.0720      Uiso 1.00 calc . . .
 H(7)   H  0.0824      0.2513      0.5664      0.0617      Uiso 1.00 calc . . .
 H(8)   H  -0.2347     -0.3084     0.1715      0.0686      Uiso 1.00 calc . . .
 H(9)   H  -0.3741     -0.3545     0.0768      0.0834      Uiso 1.00 calc . . .
 H(10)  H  -0.5631     -0.2671     0.0428      0.0772      Uiso 1.00 calc . . .
 H(11)  H  -0.6240     -0.1375     0.1025      0.0781      Uiso 1.00 calc . . .
 H(12)  H  -0.4870     -0.0968     0.1967      0.0678      Uiso 1.00 calc . . .
 H(13)  H  -0.3245     -0.3480     0.3183      0.0631      Uiso 1.00 calc . . .
 H(14)  H  -0.2085     -0.4888     0.3573      0.0729      Uiso 1.00 calc . . .
 H(15)  H  0.0181      -0.4936     0.3504      0.0667      Uiso 1.00 calc . . .
 H(16)  H  0.1403      -0.3562     0.3084      0.0827      Uiso 1.00 calc . . .
 H(17)  H  0.0230      -0.2165     0.2671      0.0693      Uiso 1.00 calc . . .
 H(18)  H  0.1000      0.3582      0.2771      0.0631      Uiso 1.00 calc . . .
 H(19)  H  0.3416      0.2856      0.1976      0.0662      Uiso 1.00 calc . . .
 H(20)  H  0.3250      0.3911      0.2259      0.0662      Uiso 1.00 calc . . .
 H(21)  H  -0.1213     0.3241      0.3263      0.0664      Uiso 1.00 calc . . .
 H(22)  H  -0.3286     0.2882      0.3590      0.0806      Uiso 1.00 calc . . .
 H(23)  H  -0.5135     0.1850      0.2988      0.0750      Uiso 1.00 calc . . .
 H(24)  H  -0.4811     0.1365      0.2010      0.0662      Uiso 1.00 calc . . .
 H(25)  H  0.4670      0.3883      0.0317      0.0670      Uiso 1.00 calc . . .
 H(26)  H  0.6999      0.4152      0.0268      0.0863      Uiso 1.00 calc . . .
 H(27)  H  0.8589      0.4539      0.1155      0.0824      Uiso 1.00 calc . . .
 H(28)  H  0.7879      0.4884      0.2063      0.0610      Uiso 1.00 calc . . .
 H(29)  H  0.5487      0.4574      0.2123      0.0707      Uiso 1.00 calc . . .
 H(30)  H  0.3214      0.5761      0.2068      0.0823      Uiso 1.00 calc . . .
 H(31)  H  0.2239      0.7326      0.2004      0.0855      Uiso 1.00 calc . . .
 H(32)  H  0.0697      0.7681      0.1179      0.0915      Uiso 1.00 calc . . .
 H(33)  H  0.0077      0.6502      0.0363      0.0878      Uiso 1.00 calc . . .
 H(34)  H  0.1169      0.4955      0.0385      0.0767      Uiso 1.00 calc . . .
 H(35)  H  0.7029      0.4092      0.5554      0.1021      Uiso 1.00 calc . . .
 H(36)  H  0.6279      0.4329      0.4919      0.1021      Uiso 1.00 calc . . .

loop_
_atom_site_aniso_label
_atom_site_aniso_U_11
_atom_site_aniso_U_22
_atom_site_aniso_U_33
_atom_site_aniso_U_12
_atom_site_aniso_U_13
_atom_site_aniso_U_23
 Rh(1)  0.0410(5)   0.0473(5)   0.0375(4)   -0.0028(3)  0.0047(3)   -0.0050(3) 
 Rh(2)  0.0428(5)   0.0430(5)   0.0338(4)   0.0029(3)   0.0029(3)   -0.0029(3) 
 Rh(3)  0.0484(6)   0.0656(6)   0.0547(5)   0.0056(4)   0.0059(4)   0.0085(4)  
 Rh(4)  0.0419(5)   0.0485(5)   0.0590(5)   0.0030(4)   0.0015(4)   0.0047(4)  
 Cl(1)  0.080(3)    0.117(4)    0.140(4)    0.030(3)    0.019(3)    0.017(3)   
 Cl(2)  0.092(4)    0.072(3)    0.210(5)    0.012(2)    0.005(4)    0.009(3)   
 P(1)   0.043(2)    0.044(2)    0.036(1)    -0.001(1)   0.006(1)    -0.0044(9) 
 P(2)   0.050(2)    0.051(2)    0.045(1)    0.003(1)    -0.002(1)   -0.006(1)  
 F(1)   0.101(7)    0.113(7)    0.067(4)    -0.028(5)   0.024(4)    0.004(4)   
 F(2)   0.073(6)    0.19(1)     0.068(5)    -0.017(6)   -0.009(4)   -0.030(5)  
 F(3)   0.16(1)     0.071(7)    0.136(8)    0.035(6)    0.056(7)    -0.005(5)  
 F(4)   0.053(5)    0.124(7)    0.099(6)    0.013(5)    0.012(4)    0.012(5)   
 F(5)   0.064(6)    0.138(8)    0.086(5)    0.007(5)    0.041(4)    0.019(5)   
 F(6)   0.29(2)     0.152(10)   0.111(7)    0.15(1)     0.127(9)    0.074(6)   
 F(7)   0.17(1)     0.065(7)    0.173(10)   -0.017(6)   0.068(8)    -0.005(5)  
 F(8)   0.13(1)     0.35(2)     0.090(7)    -0.03(1)    -0.035(7)   0.051(9)   
 O(1)   0.079(7)    0.061(5)    0.049(4)    -0.002(4)   0.005(4)    -0.006(3)  
 O(01A) 0.067(7)    0.073(6)    0.101(7)    -0.033(5)   0.006(5)    -0.016(5)  
 O(01B) 0.090(9)    0.14(1)     0.086(7)    0.000(7)    0.047(6)    -0.006(6)  
 O(02A) 0.091(8)    0.092(7)    0.066(5)    0.042(6)    0.027(5)    -0.009(4)  
 O(02B) 0.080(7)    0.067(7)    0.087(6)    0.005(5)    0.006(5)    -0.003(4)  
 O(03A) 0.058(6)    0.073(6)    0.056(4)    -0.020(4)   0.021(4)    0.007(4)   
 O(03B) 0.076(7)    0.132(9)    0.054(5)    0.016(6)    0.008(5)    0.005(5)   
 O(04A) 0.129(9)    0.085(6)    0.029(4)    0.012(6)    0.016(4)    -0.016(3)  
 O(04B) 0.055(7)    0.16(1)     0.077(6)    -0.027(7)   0.005(5)    0.003(6)   
 N(1A)  0.044(5)    0.034(4)    0.033(4)    -0.004(3)   0.001(3)    -0.009(3)  
 N(1B)  0.032(5)    0.038(5)    0.069(5)    -0.003(4)   0.004(4)    0.006(4)   
 N(2A)  0.038(5)    0.048(5)    0.037(4)    0.005(4)    0.006(3)    -0.002(3)  
 N(2B)  0.052(6)    0.044(5)    0.050(5)    0.004(4)    0.011(4)    0.011(3)   
 N(3A)  0.039(5)    0.045(5)    0.041(4)    0.000(4)    0.005(4)    -0.002(3)  
 N(3B)  0.037(5)    0.032(5)    0.081(6)    0.006(4)    0.005(5)    0.002(4)   
 C(01A) 0.059(9)    0.079(9)    0.050(6)    0.002(7)    0.012(6)    -0.001(5)  
 C(01B) 0.056(9)    0.09(1)     0.063(8)    0.001(7)    0.005(7)    -0.003(6)  
 C(02A) 0.047(7)    0.084(9)    0.032(5)    -0.001(6)   -0.002(5)   0.000(5)   
 C(02B) 0.066(9)    0.050(7)    0.053(6)    0.010(6)    -0.004(5)   -0.018(5)  
 C(03A) 0.053(7)    0.076(8)    0.030(4)    0.030(6)    0.011(5)    0.004(4)   
 C(03B) 0.050(8)    0.063(8)    0.067(7)    0.004(6)    -0.004(6)   0.002(5)   
 C(04A) 0.061(8)    0.041(7)    0.074(8)    0.000(5)    -0.001(6)   0.006(5)   
 C(04B) 0.059(9)    0.084(10)   0.064(7)    0.009(7)    0.011(7)    0.008(6)   
 C(11A) 0.036(6)    0.037(5)    0.041(5)    0.005(4)    0.012(4)    0.005(3)   
 C(11B) 0.051(7)    0.051(7)    0.053(6)    0.009(5)    0.008(5)    0.020(5)   
 C(12A) 0.050(7)    0.042(6)    0.037(5)    -0.001(4)   0.004(4)    0.001(4)   
 C(12B) 0.063(8)    0.035(6)    0.050(6)    -0.001(5)   -0.007(5)   0.000(4)   
 C(13A) 0.033(5)    0.035(5)    0.046(5)    0.006(4)    0.004(4)    -0.007(3)  
 C(13B) 0.046(7)    0.044(6)    0.059(6)    0.010(5)    0.004(5)    0.005(4)   
 C(14A) 0.037(6)    0.054(6)    0.037(5)    0.003(4)    0.010(4)    -0.009(4)  
 C(14B) 0.042(7)    0.055(7)    0.058(6)    0.001(5)    -0.011(5)   0.005(5)   
 C(21A) 0.031(5)    0.059(6)    0.031(4)    0.000(4)    0.006(4)    0.000(4)   
 C(21B) 0.060(8)    0.041(6)    0.051(6)    0.012(5)    0.020(5)    0.005(4)   
 C(22A) 0.048(7)    0.037(6)    0.049(5)    -0.003(4)   -0.002(5)   -0.008(4)  
 C(22B) 0.049(7)    0.056(7)    0.066(7)    0.014(5)    0.013(6)    0.004(5)   
 C(23A) 0.049(7)    0.045(7)    0.061(6)    -0.016(5)   0.000(5)    -0.008(4)  
 C(23B) 0.08(1)     0.069(8)    0.052(6)    0.018(7)    0.012(6)    0.001(5)   
 C(24A) 0.067(9)    0.059(8)    0.049(6)    -0.004(6)   -0.004(6)   -0.010(5)  
 C(24B) 0.074(9)    0.045(7)    0.071(7)    0.010(6)    0.016(7)    0.013(5)   
 C(25A) 0.053(7)    0.039(6)    0.057(6)    0.008(5)    0.001(5)    -0.017(4)  
 C(25B) 0.039(7)    0.061(7)    0.066(7)    0.013(5)    0.015(5)    -0.004(5)  
 C(31A) 0.051(7)    0.038(6)    0.048(5)    0.011(4)    0.008(5)    0.003(4)   
 C(31B) 0.064(8)    0.037(6)    0.047(5)    -0.002(5)   0.013(5)    -0.002(4)  
 C(32A) 0.067(8)    0.051(7)    0.050(6)    0.012(5)    0.003(5)    -0.009(4)  
 C(32B) 0.066(9)    0.051(7)    0.046(6)    0.006(5)    0.013(5)    -0.009(4)  
 C(33A) 0.10(1)     0.056(8)    0.052(6)    0.016(7)    -0.002(7)   -0.009(5)  
 C(33B) 0.08(1)     0.071(9)    0.068(8)    0.011(7)    0.029(7)    0.000(6)   
 C(34A) 0.09(1)     0.063(8)    0.036(5)    0.009(7)    -0.010(6)   -0.010(4)  
 C(34B) 0.060(9)    0.068(9)    0.082(8)    0.022(6)    0.022(7)    0.009(6)   
 C(35A) 0.079(10)   0.068(8)    0.042(6)    0.004(6)    -0.005(6)   -0.002(5)  
 C(35B) 0.051(7)    0.053(7)    0.054(6)    0.010(5)    0.015(5)    0.001(4)   
 C(36A) 0.066(8)    0.046(7)    0.050(6)    -0.001(5)   -0.004(5)   -0.005(4)  
 C(36B) 0.051(8)    0.074(8)    0.045(6)    0.007(6)    0.004(5)    -0.002(5)  
 C(41A) 0.032(6)    0.050(6)    0.036(4)    -0.008(4)   0.000(4)    -0.006(4)  
 C(41B) 0.060(8)    0.037(6)    0.049(5)    0.002(5)    0.003(5)    0.007(4)   
 C(42A) 0.050(7)    0.059(7)    0.047(5)    0.006(5)    0.014(5)    -0.004(4)  
 C(42B) 0.065(9)    0.072(9)    0.065(7)    0.001(7)    0.003(6)    -0.004(6)  
 C(43A) 0.067(9)    0.056(8)    0.063(7)    0.009(6)    0.016(6)    0.006(5)   
 C(43B) 0.08(1)     0.054(8)    0.087(9)    0.018(7)    0.004(8)    -0.004(6)  
 C(44A) 0.084(10)   0.040(7)    0.045(5)    0.015(6)    0.004(6)    -0.004(4)  
 C(44B) 0.08(1)     0.056(9)    0.10(1)     0.025(7)    0.022(8)    0.011(7)   
 C(45A) 0.059(9)    0.071(9)    0.073(8)    0.005(6)    -0.002(6)   0.000(6)   
 C(45B) 0.068(10)   0.075(10)   0.081(9)    0.012(7)    -0.003(7)   0.027(7)   
 C(46A) 0.065(9)    0.049(7)    0.063(7)    0.002(5)    0.015(6)    0.010(5)   
 C(46B) 0.053(8)    0.075(8)    0.057(6)    0.005(6)    -0.004(6)   0.002(5)   
 C(51)  0.07(1)     0.08(1)     0.11(1)     0.021(8)    0.007(9)    -0.036(8)  
 B(1)   0.050(8)    0.057(8)    0.048(6)    0.005(6)    0.002(6)    -0.013(5)  
 B(2)   0.044(8)    0.048(8)    0.066(8)    0.006(6)    0.011(6)    0.009(5)   
#------------------------------------------------------------------------------
_computing_data_collection            'PROCESS-AUTO'
_computing_cell_refinement            'PROCESS-AUTO'
_computing_data_reduction             'teXsan Ver. 1.11'
_computing_structure_solution          SIR92
_computing_structure_refinement       'SHELXL97'
_computing_publication_material       'teXsan Ver. 1.11'
_computing_molecular_graphics          ?
#------------------------------------------------------------------------------
_geom_special_details
;
 ?
;
loop_
_geom_bond_atom_site_label_1
_geom_bond_atom_site_label_2
_geom_bond_distance
_geom_bond_site_symmetry_1
_geom_bond_site_symmetry_2
_geom_bond_publ_flag
 Rh(1)     P(1)      2.312(3)   . . yes
 Rh(1)     N(1A)     2.084(8)   . . yes
 Rh(1)     C(01A)    1.86(1)    . . yes
 Rh(1)     C(02A)    1.92(1)    . . yes
 Rh(2)     N(2A)     2.070(7)   . . yes
 Rh(2)     N(3A)     2.100(8)   . . yes
 Rh(2)     C(03A)    1.84(1)    . . yes
 Rh(2)     C(04A)    1.86(1)    . . yes
 Rh(3)     O(1)      2.063(8)   . . yes
 Rh(3)     N(1B)     2.100(9)   . . yes
 Rh(3)     C(01B)    1.86(1)    . . yes
 Rh(3)     C(02B)    1.83(1)    . . yes
 Rh(4)     N(2B)     2.058(9)   . . yes
 Rh(4)     N(3B)     2.122(10)  . . yes
 Rh(4)     C(03B)    1.85(1)    . . yes
 Rh(4)     C(04B)    1.86(1)    . . yes
 Cl(1)     C(51)     1.75(2)    . . yes
 Cl(2)     C(51)     1.73(2)    . . yes
 P(1)      C(14A)    1.84(1)    . . yes
 P(1)      C(31A)    1.786(9)   . . yes
 P(1)      C(41A)    1.81(1)    . . yes
 P(2)      O(1)      1.526(7)   . . yes
 P(2)      C(14B)    1.79(1)    . . yes
 P(2)      C(31B)    1.82(1)    . . yes
 P(2)      C(41B)    1.79(1)    . . yes
 F(1)      B(1)      1.36(2)    . . yes
 F(2)      B(1)      1.32(1)    . . yes
 F(3)      B(1)      1.38(2)    . . yes
 F(4)      B(1)      1.38(2)    . . yes
 F(5)      B(2)      1.37(2)    . . yes
 F(6)      B(2)      1.29(2)    . . yes
 F(7)      B(2)      1.36(2)    . . yes
 F(8)      B(2)      1.32(2)    . . yes
 O(01A)    C(01A)    1.13(2)    . . yes
 O(01B)    C(01B)    1.15(2)    . . yes
 O(02A)    C(02A)    1.14(2)    . . yes
 O(02B)    C(02B)    1.11(2)    . . yes
 O(03A)    C(03A)    1.14(1)    . . yes
 O(03B)    C(03B)    1.15(2)    . . yes
 O(04A)    C(04A)    1.16(1)    . . yes
 O(04B)    C(04B)    1.14(2)    . . yes
 N(1A)     N(2A)     1.348(10)  . . yes
 N(1A)     C(11A)    1.37(1)    . . yes
 N(1B)     N(2B)     1.35(1)    . . yes
 N(1B)     C(11B)    1.35(1)    . . yes
 N(2A)     C(13A)    1.35(1)    . . yes
 N(2B)     C(13B)    1.39(1)    . . yes
 N(3A)     C(21A)    1.36(1)    . . yes
 N(3A)     C(25A)    1.36(1)    . . yes
 N(3B)     C(21B)    1.39(1)    . . yes
 N(3B)     C(25B)    1.29(2)    . . yes
 C(11A)    C(12A)    1.41(1)    . . yes
 C(11A)    C(14A)    1.47(1)    . . yes
 C(11B)    C(12B)    1.39(2)    . . yes
 C(11B)    C(14B)    1.48(2)    . . yes
 C(12A)    C(13A)    1.39(1)    . . yes
 C(12B)    C(13B)    1.37(2)    . . yes
 C(13A)    C(21A)    1.45(1)    . . yes
 C(13B)    C(21B)    1.44(2)    . . yes
 C(21A)    C(22A)    1.37(1)    . . yes
 C(21B)    C(22B)    1.38(2)    . . yes
 C(22A)    C(23A)    1.42(1)    . . yes
 C(22B)    C(23B)    1.36(2)    . . yes
 C(23A)    C(24A)    1.34(2)    . . yes
 C(23B)    C(24B)    1.39(2)    . . yes
 C(24A)    C(25A)    1.38(2)    . . yes
 C(24B)    C(25B)    1.39(2)    . . yes
 C(31A)    C(32A)    1.38(2)    . . yes
 C(31A)    C(36A)    1.36(2)    . . yes
 C(31B)    C(32B)    1.42(2)    . . yes
 C(31B)    C(36B)    1.37(1)    . . yes
 C(32A)    C(33A)    1.40(1)    . . yes
 C(32B)    C(33B)    1.36(2)    . . yes
 C(33A)    C(34A)    1.36(2)    . . yes
 C(33B)    C(34B)    1.38(2)    . . yes
 C(34A)    C(35A)    1.37(2)    . . yes
 C(34B)    C(35B)    1.37(2)    . . yes
 C(35A)    C(36A)    1.40(1)    . . yes
 C(35B)    C(36B)    1.41(2)    . . yes
 C(41A)    C(42A)    1.40(1)    . . yes
 C(41A)    C(46A)    1.37(2)    . . yes
 C(41B)    C(42B)    1.38(2)    . . yes
 C(41B)    C(46B)    1.41(1)    . . yes
 C(42A)    C(43A)    1.38(2)    . . yes
 C(42B)    C(43B)    1.38(2)    . . yes
 C(43A)    C(44A)    1.35(2)    . . yes
 C(43B)    C(44B)    1.34(2)    . . yes
 C(44A)    C(45A)    1.39(2)    . . yes
 C(44B)    C(45B)    1.39(2)    . . yes
 C(45A)    C(46A)    1.39(2)    . . yes
 C(45B)    C(46B)    1.40(2)    . . yes
#------------------------------------------------------------------------------
loop_
_geom_angle_atom_site_label_1
_geom_angle_atom_site_label_2
_geom_angle_atom_site_label_3
_geom_angle
_geom_angle_site_symmetry_1
_geom_angle_site_symmetry_2
_geom_angle_site_symmetry_3
_geom_angle_publ_flag
   P(1)      Rh(1)     N(1A)     80.1(2)    . . . yes
   P(1)      Rh(1)     C(01A)    93.3(4)    . . . yes
   P(1)      Rh(1)     C(02A)    164.4(3)   . . . yes
   N(1A)     Rh(1)     C(01A)    172.9(5)   . . . yes
   N(1A)     Rh(1)     C(02A)    97.0(4)    . . . yes
   C(01A)    Rh(1)     C(02A)    90.1(6)    . . . yes
   N(2A)     Rh(2)     N(3A)     78.4(3)    . . . yes
   N(2A)     Rh(2)     C(03A)    100.1(4)   . . . yes
   N(2A)     Rh(2)     C(04A)    172.9(4)   . . . yes
   N(3A)     Rh(2)     C(03A)    177.9(4)   . . . yes
   N(3A)     Rh(2)     C(04A)    96.8(4)    . . . yes
   C(03A)    Rh(2)     C(04A)    84.8(5)    . . . yes
   O(1)      Rh(3)     N(1B)     88.0(3)    . . . yes
   O(1)      Rh(3)     C(01B)    90.0(5)    . . . yes
   O(1)      Rh(3)     C(02B)    174.7(5)   . . . yes
   N(1B)     Rh(3)     C(01B)    177.9(5)   . . . yes
   N(1B)     Rh(3)     C(02B)    95.0(4)    . . . yes
   C(01B)    Rh(3)     C(02B)    87.0(6)    . . . yes
   N(2B)     Rh(4)     N(3B)     79.7(3)    . . . yes
   N(2B)     Rh(4)     C(03B)    99.4(4)    . . . yes
   N(2B)     Rh(4)     C(04B)    175.6(5)   . . . yes
   N(3B)     Rh(4)     C(03B)    176.0(4)   . . . yes
   N(3B)     Rh(4)     C(04B)    95.9(5)    . . . yes
   C(03B)    Rh(4)     C(04B)    85.0(6)    . . . yes
   Rh(1)     P(1)      C(14A)    99.8(3)    . . . yes
   Rh(1)     P(1)      C(31A)    118.0(4)   . . . yes
   Rh(1)     P(1)      C(41A)    115.9(3)   . . . yes
   C(14A)    P(1)      C(31A)    105.4(4)   . . . yes
   C(14A)    P(1)      C(41A)    109.6(5)   . . . yes
   C(31A)    P(1)      C(41A)    107.2(4)   . . . yes
   O(1)      P(2)      C(14B)    114.9(5)   . . . yes
   O(1)      P(2)      C(31B)    108.6(5)   . . . yes
   O(1)      P(2)      C(41B)    108.1(5)   . . . yes
   C(14B)    P(2)      C(31B)    105.9(5)   . . . yes
   C(14B)    P(2)      C(41B)    108.0(5)   . . . yes
   C(31B)    P(2)      C(41B)    111.4(5)   . . . yes
   Rh(3)     O(1)      P(2)      120.3(4)   . . . yes
   Rh(1)     N(1A)     N(2A)     130.5(6)   . . . yes
   Rh(1)     N(1A)     C(11A)    120.0(5)   . . . yes
   N(2A)     N(1A)     C(11A)    109.0(7)   . . . yes
   Rh(3)     N(1B)     N(2B)     127.0(6)   . . . yes
   Rh(3)     N(1B)     C(11B)    122.9(8)   . . . yes
   N(2B)     N(1B)     C(11B)    108.8(9)   . . . yes
   Rh(2)     N(2A)     N(1A)     135.8(6)   . . . yes
   Rh(2)     N(2A)     C(13A)    113.5(5)   . . . yes
   N(1A)     N(2A)     C(13A)    108.2(7)   . . . yes
   Rh(4)     N(2B)     N(1B)     136.9(6)   . . . yes
   Rh(4)     N(2B)     C(13B)    114.4(7)   . . . yes
   N(1B)     N(2B)     C(13B)    107.9(8)   . . . yes
   Rh(2)     N(3A)     C(21A)    114.8(6)   . . . yes
   Rh(2)     N(3A)     C(25A)    126.4(7)   . . . yes
   C(21A)    N(3A)     C(25A)    118.7(9)   . . . yes
   Rh(4)     N(3B)     C(21B)    112.2(7)   . . . yes
   Rh(4)     N(3B)     C(25B)    128.6(7)   . . . yes
   C(21B)    N(3B)     C(25B)    119.1(10)  . . . yes
   Rh(1)     C(01A)    O(01A)    177(1)     . . . yes
   Rh(3)     C(01B)    O(01B)    178(1)     . . . yes
   Rh(1)     C(02A)    O(02A)    172.7(9)   . . . yes
   Rh(3)     C(02B)    O(02B)    178(1)     . . . yes
   Rh(2)     C(03A)    O(03A)    176.6(9)   . . . yes
   Rh(4)     C(03B)    O(03B)    176(1)     . . . yes
   Rh(2)     C(04A)    O(04A)    176(1)     . . . yes
   Rh(4)     C(04B)    O(04B)    175(1)     . . . yes
   N(1A)     C(11A)    C(12A)    108.2(8)   . . . yes
   N(1A)     C(11A)    C(14A)    119.9(8)   . . . yes
   C(12A)    C(11A)    C(14A)    131.9(9)   . . . yes
   N(1B)     C(11B)    C(12B)    108.6(10)  . . . yes
   N(1B)     C(11B)    C(14B)    121(1)     . . . yes
   C(12B)    C(11B)    C(14B)    129.5(9)   . . . yes
   C(11A)    C(12A)    C(13A)    104.4(9)   . . . yes
   C(11B)    C(12B)    C(13B)    106.7(9)   . . . yes
   N(2A)     C(13A)    C(12A)    110.1(8)   . . . yes
   N(2A)     C(13A)    C(21A)    117.7(8)   . . . yes
   C(12A)    C(13A)    C(21A)    132.1(9)   . . . yes
   N(2B)     C(13B)    C(12B)    107(1)     . . . yes
   N(2B)     C(13B)    C(21B)    116.3(9)   . . . yes
   C(12B)    C(13B)    C(21B)    135.8(10)  . . . yes
   P(1)      C(14A)    C(11A)    108.4(7)   . . . yes
   P(2)      C(14B)    C(11B)    110.2(7)   . . . yes
   N(3A)     C(21A)    C(13A)    114.0(8)   . . . yes
   N(3A)     C(21A)    C(22A)    122.3(8)   . . . yes
   C(13A)    C(21A)    C(22A)    123.6(9)   . . . yes
   N(3B)     C(21B)    C(13B)    116.6(9)   . . . yes
   N(3B)     C(21B)    C(22B)    119(1)     . . . yes
   C(13B)    C(21B)    C(22B)    123.6(10)  . . . yes
   C(21A)    C(22A)    C(23A)    118.7(9)   . . . yes
   C(21B)    C(22B)    C(23B)    120(1)     . . . yes
   C(22A)    C(23A)    C(24A)    117(1)     . . . yes
   C(22B)    C(23B)    C(24B)    120(1)     . . . yes
   C(23A)    C(24A)    C(25A)    122.3(10)  . . . yes
   C(23B)    C(24B)    C(25B)    116(1)     . . . yes
   N(3A)     C(25A)    C(24A)    120.3(10)  . . . yes
   N(3B)     C(25B)    C(24B)    124(1)     . . . yes
   P(1)      C(31A)    C(32A)    122.3(8)   . . . yes
   P(1)      C(31A)    C(36A)    120.2(8)   . . . yes
   C(32A)    C(31A)    C(36A)    117.4(9)   . . . yes
   P(2)      C(31B)    C(32B)    117.6(8)   . . . yes
   P(2)      C(31B)    C(36B)    121.0(9)   . . . yes
   C(32B)    C(31B)    C(36B)    121(1)     . . . yes
   C(31A)    C(32A)    C(33A)    120(1)     . . . yes
   C(31B)    C(32B)    C(33B)    119.1(10)  . . . yes
   C(32A)    C(33A)    C(34A)    120(1)     . . . yes
   C(32B)    C(33B)    C(34B)    119(1)     . . . yes
   C(33A)    C(34A)    C(35A)    121.0(10)  . . . yes
   C(33B)    C(34B)    C(35B)    122(1)     . . . yes
   C(34A)    C(35A)    C(36A)    117(1)     . . . yes
   C(34B)    C(35B)    C(36B)    118.6(10)  . . . yes
   C(31A)    C(36A)    C(35A)    123(1)     . . . yes
   C(31B)    C(36B)    C(35B)    118(1)     . . . yes
   P(1)      C(41A)    C(42A)    116.6(8)   . . . yes
   P(1)      C(41A)    C(46A)    123.1(8)   . . . yes
   C(42A)    C(41A)    C(46A)    120.2(10)  . . . yes
   P(2)      C(41B)    C(42B)    122.8(8)   . . . yes
   P(2)      C(41B)    C(46B)    118.0(8)   . . . yes
   C(42B)    C(41B)    C(46B)    119(1)     . . . yes
   C(41A)    C(42A)    C(43A)    119(1)     . . . yes
   C(41B)    C(42B)    C(43B)    119(1)     . . . yes
   C(42A)    C(43A)    C(44A)    120(1)     . . . yes
   C(42B)    C(43B)    C(44B)    120(1)     . . . yes
   C(43A)    C(44A)    C(45A)    120(1)     . . . yes
   C(43B)    C(44B)    C(45B)    121(1)     . . . yes
   C(44A)    C(45A)    C(46A)    120(1)     . . . yes
   C(44B)    C(45B)    C(46B)    118(1)     . . . yes
   C(41A)    C(46A)    C(45A)    119(1)     . . . yes
   C(41B)    C(46B)    C(45B)    119(1)     . . . yes
   Cl(1)     C(51)     Cl(2)     111.9(9)   . . . yes
   F(1)      B(1)      F(2)      113(1)     . . . yes
   F(1)      B(1)      F(3)      107(1)     . . . yes
   F(1)      B(1)      F(4)      109(1)     . . . yes
   F(2)      B(1)      F(3)      109(1)     . . . yes
   F(2)      B(1)      F(4)      110(1)     . . . yes
   F(3)      B(1)      F(4)      104(1)     . . . yes
   F(5)      B(2)      F(6)      110(1)     . . . yes
   F(5)      B(2)      F(7)      108(1)     . . . yes
   F(5)      B(2)      F(8)      111(1)     . . . yes
   F(6)      B(2)      F(7)      105(1)     . . . yes
   F(6)      B(2)      F(8)      115(1)     . . . yes
   F(7)      B(2)      F(8)      105(1)     . . . yes
#------------------------------------------------------------------------------
loop_
_geom_torsion_atom_site_label_1
_geom_torsion_atom_site_label_2
_geom_torsion_atom_site_label_3
_geom_torsion_atom_site_label_4
_geom_torsion
_geom_torsion_site_symmetry_1
_geom_torsion_site_symmetry_2
_geom_torsion_site_symmetry_3
_geom_torsion_site_symmetry_4
_geom_torsion_publ_flag
 Rh(1)     P(1)      C(14A)    C(11A)    32.4(7)    . . . . yes
 Rh(1)     P(1)      C(31A)    C(32A)    -156.4(8)  . . . . yes
 Rh(1)     P(1)      C(31A)    C(36A)    26(1)      . . . . yes
 Rh(1)     P(1)      C(41A)    C(42A)    54.5(8)    . . . . yes
 Rh(1)     P(1)      C(41A)    C(46A)    -126.3(8)  . . . . yes
 Rh(1)     N(1A)     N(2A)     Rh(2)     28(1)      . . . . yes
 Rh(1)     N(1A)     N(2A)     C(13A)    -171.2(6)  . . . . yes
 Rh(1)     N(1A)     C(11A)    C(12A)    173.0(6)   . . . . yes
 Rh(1)     N(1A)     C(11A)    C(14A)    -7(1)      . . . . yes
 Rh(2)     N(2A)     N(1A)     C(11A)    -159.8(7)  . . . . yes
 Rh(2)     N(2A)     C(13A)    C(12A)    164.0(7)   . . . . yes
 Rh(2)     N(2A)     C(13A)    C(21A)    -13(1)     . . . . yes
 Rh(2)     N(3A)     C(21A)    C(13A)    1(1)       . . . . yes
 Rh(2)     N(3A)     C(21A)    C(22A)    -176.6(8)  . . . . yes
 Rh(2)     N(3A)     C(25A)    C(24A)    175.3(8)   . . . . yes
 Rh(3)     O(1)      P(2)      C(14B)    -1.1(8)    . . . . yes
 Rh(3)     O(1)      P(2)      C(31B)    117.3(6)   . . . . yes
 Rh(3)     O(1)      P(2)      C(41B)    -121.8(6)  . . . . yes
 Rh(3)     N(1B)     N(2B)     Rh(4)     -21(1)     . . . . yes
 Rh(3)     N(1B)     N(2B)     C(13B)    169.9(7)   . . . . yes
 Rh(3)     N(1B)     C(11B)    C(12B)    -170.8(7)  . . . . yes
 Rh(3)     N(1B)     C(11B)    C(14B)    8(1)       . . . . yes
 Rh(4)     N(2B)     N(1B)     C(11B)    171.8(8)   . . . . yes
 Rh(4)     N(2B)     C(13B)    C(12B)    -173.2(7)  . . . . yes
 Rh(4)     N(2B)     C(13B)    C(21B)    8(1)       . . . . yes
 Rh(4)     N(3B)     C(21B)    C(13B)    -4(1)      . . . . yes
 Rh(4)     N(3B)     C(21B)    C(22B)    175.7(8)   . . . . yes
 Rh(4)     N(3B)     C(25B)    C(24B)    -176.1(9)  . . . . yes
 P(1)      Rh(1)     N(1A)     N(2A)     -165.5(8)  . . . . yes
 P(1)      Rh(1)     N(1A)     C(11A)    23.6(6)    . . . . yes
 P(1)      Rh(1)     C(01A)    O(01A)    73(27)     . . . . yes
 P(1)      Rh(1)     C(02A)    O(02A)    40(9)      . . . . yes
 P(1)      C(14A)    C(11A)    N(1A)     -19(1)     . . . . yes
 P(1)      C(14A)    C(11A)    C(12A)    160.0(9)   . . . . yes
 P(1)      C(31A)    C(32A)    C(33A)    -179.0(9)  . . . . yes
 P(1)      C(31A)    C(36A)    C(35A)    178.6(9)   . . . . yes
 P(1)      C(41A)    C(42A)    C(43A)    -178.1(8)  . . . . yes
 P(1)      C(41A)    C(46A)    C(45A)    177.8(8)   . . . . yes
 P(2)      O(1)      Rh(3)     N(1B)     40.0(6)    . . . . yes
 P(2)      O(1)      Rh(3)     C(01B)    -140.4(7)  . . . . yes
 P(2)      O(1)      Rh(3)     C(02B)    -85(4)     . . . . yes
 P(2)      C(14B)    C(11B)    N(1B)     48(1)      . . . . yes
 P(2)      C(14B)    C(11B)    C(12B)    -132(1)    . . . . yes
 P(2)      C(31B)    C(32B)    C(33B)    -179.4(9)  . . . . yes
 P(2)      C(31B)    C(36B)    C(35B)    179.5(8)   . . . . yes
 P(2)      C(41B)    C(42B)    C(43B)    179(1)     . . . . yes
 P(2)      C(41B)    C(46B)    C(45B)    177(1)     . . . . yes
 O(1)      Rh(3)     N(1B)     N(2B)     144.6(8)   . . . . yes
 O(1)      Rh(3)     N(1B)     C(11B)    -49.8(8)   . . . . yes
 O(1)      Rh(3)     C(01B)    O(01B)    -169(41)   . . . . yes
 O(1)      Rh(3)     C(02B)    O(02B)    -5(30)     . . . . yes
 O(1)      P(2)      C(14B)    C(11B)    -51.9(10)  . . . . yes
 O(1)      P(2)      C(31B)    C(32B)    16.3(9)    . . . . yes
 O(1)      P(2)      C(31B)    C(36B)    -159.7(9)  . . . . yes
 O(1)      P(2)      C(41B)    C(42B)    171(1)     . . . . yes
 O(1)      P(2)      C(41B)    C(46B)    -4(1)      . . . . yes
 O(01A)    C(01A)    Rh(1)     N(1A)     50(28)     . . . . yes
 O(01A)    C(01A)    Rh(1)     C(02A)    -121(27)   . . . . yes
 O(01B)    C(01B)    Rh(3)     N(1B)     -160(33)   . . . . yes
 O(01B)    C(01B)    Rh(3)     C(02B)    15(41)     . . . . yes
 O(02A)    C(02A)    Rh(1)     N(1A)     119(8)     . . . . yes
 O(02A)    C(02A)    Rh(1)     C(01A)    -61(8)     . . . . yes
 O(02B)    C(02B)    Rh(3)     N(1B)     -130(27)   . . . . yes
 O(02B)    C(02B)    Rh(3)     C(01B)    49(27)     . . . . yes
 O(03A)    C(03A)    Rh(2)     N(2A)     131(17)    . . . . yes
 O(03A)    C(03A)    Rh(2)     N(3A)     87(18)     . . . . yes
 O(03A)    C(03A)    Rh(2)     C(04A)    -53(17)    . . . . yes
 O(03B)    C(03B)    Rh(4)     N(2B)     -149(15)   . . . . yes
 O(03B)    C(03B)    Rh(4)     N(3B)     -72(17)    . . . . yes
 O(03B)    C(03B)    Rh(4)     C(04B)    29(15)     . . . . yes
 O(04A)    C(04A)    Rh(2)     N(2A)     55(16)     . . . . yes
 O(04A)    C(04A)    Rh(2)     N(3A)     103(14)    . . . . yes
 O(04A)    C(04A)    Rh(2)     C(03A)    -77(14)    . . . . yes
 O(04B)    C(04B)    Rh(4)     N(2B)     -138(13)   . . . . yes
 O(04B)    C(04B)    Rh(4)     N(3B)     -135(15)   . . . . yes
 O(04B)    C(04B)    Rh(4)     C(03B)    48(15)     . . . . yes
 N(1A)     Rh(1)     P(1)      C(14A)    -27.4(4)   . . . . yes
 N(1A)     Rh(1)     P(1)      C(31A)    -140.9(4)  . . . . yes
 N(1A)     Rh(1)     P(1)      C(41A)    90.1(4)    . . . . yes
 N(1A)     N(2A)     Rh(2)     N(3A)     170.4(10)  . . . . yes
 N(1A)     N(2A)     Rh(2)     C(03A)    -8(1)      . . . . yes
 N(1A)     N(2A)     Rh(2)     C(04A)    -140(3)    . . . . yes
 N(1A)     N(2A)     C(13A)    C(12A)    -1(1)      . . . . yes
 N(1A)     N(2A)     C(13A)    C(21A)    -178.9(8)  . . . . yes
 N(1A)     C(11A)    C(12A)    C(13A)    0(1)       . . . . yes
 N(1B)     N(2B)     Rh(4)     N(3B)     -176.6(10) . . . . yes
 N(1B)     N(2B)     Rh(4)     C(03B)    0(1)       . . . . yes
 N(1B)     N(2B)     Rh(4)     C(04B)    -173(5)    . . . . yes
 N(1B)     N(2B)     C(13B)    C(12B)    -1(1)      . . . . yes
 N(1B)     N(2B)     C(13B)    C(21B)    -179.8(9)  . . . . yes
 N(1B)     C(11B)    C(12B)    C(13B)    2(1)       . . . . yes
 N(2A)     Rh(2)     N(3A)     C(21A)    -6.5(7)    . . . . yes
 N(2A)     Rh(2)     N(3A)     C(25A)    176.5(9)   . . . . yes
 N(2A)     N(1A)     Rh(1)     C(01A)    -141(3)    . . . . yes
 N(2A)     N(1A)     Rh(1)     C(02A)    30.0(8)    . . . . yes
 N(2A)     N(1A)     C(11A)    C(12A)    0(1)       . . . . yes
 N(2A)     N(1A)     C(11A)    C(14A)    -179.9(8)  . . . . yes
 N(2A)     C(13A)    C(12A)    C(11A)    1(1)       . . . . yes
 N(2A)     C(13A)    C(21A)    N(3A)     8(1)       . . . . yes
 N(2A)     C(13A)    C(21A)    C(22A)    -173.8(10) . . . . yes
 N(2B)     Rh(4)     N(3B)     C(21B)    6.4(7)     . . . . yes
 N(2B)     Rh(4)     N(3B)     C(25B)    -177.4(10) . . . . yes
 N(2B)     N(1B)     Rh(3)     C(01B)    135(12)    . . . . yes
 N(2B)     N(1B)     Rh(3)     C(02B)    -39.7(9)   . . . . yes
 N(2B)     N(1B)     C(11B)    C(12B)    -2(1)      . . . . yes
 N(2B)     N(1B)     C(11B)    C(14B)    176.3(9)   . . . . yes
 N(2B)     C(13B)    C(12B)    C(11B)    0(1)       . . . . yes
 N(2B)     C(13B)    C(21B)    N(3B)     -2(1)      . . . . yes
 N(2B)     C(13B)    C(21B)    C(22B)    177(1)     . . . . yes
 N(3A)     Rh(2)     N(2A)     C(13A)    10.7(7)    . . . . yes
 N(3A)     C(21A)    C(13A)    C(12A)    -168(1)    . . . . yes
 N(3A)     C(21A)    C(22A)    C(23A)    0(1)       . . . . yes
 N(3A)     C(25A)    C(24A)    C(23A)    2(1)       . . . . yes
 N(3B)     Rh(4)     N(2B)     C(13B)    -8.0(7)    . . . . yes
 N(3B)     C(21B)    C(13B)    C(12B)    179(1)     . . . . yes
 N(3B)     C(21B)    C(22B)    C(23B)    0(1)       . . . . yes
 N(3B)     C(25B)    C(24B)    C(23B)    2(1)       . . . . yes
 C(01A)    Rh(1)     P(1)      C(14A)    155.5(5)   . . . . yes
 C(01A)    Rh(1)     P(1)      C(31A)    42.0(5)    . . . . yes
 C(01A)    Rh(1)     P(1)      C(41A)    -87.0(5)   . . . . yes
 C(01A)    Rh(1)     N(1A)     C(11A)    47(3)      . . . . yes
 C(01B)    Rh(3)     N(1B)     C(11B)    -58(13)    . . . . yes
 C(02A)    Rh(1)     P(1)      C(14A)    53(1)      . . . . yes
 C(02A)    Rh(1)     P(1)      C(31A)    -60(1)     . . . . yes
 C(02A)    Rh(1)     P(1)      C(41A)    170(1)     . . . . yes
 C(02A)    Rh(1)     N(1A)     C(11A)    -140.9(7)  . . . . yes
 C(02B)    Rh(3)     N(1B)     C(11B)    125.8(8)   . . . . yes
 C(03A)    Rh(2)     N(2A)     C(13A)    -167.8(7)  . . . . yes
 C(03A)    Rh(2)     N(3A)     C(21A)    38(10)     . . . . yes
 C(03A)    Rh(2)     N(3A)     C(25A)    -138(9)    . . . . yes
 C(03B)    Rh(4)     N(2B)     C(13B)    168.0(8)   . . . . yes
 C(03B)    Rh(4)     N(3B)     C(21B)    -71(6)     . . . . yes
 C(03B)    Rh(4)     N(3B)     C(25B)    104(6)     . . . . yes
 C(04A)    Rh(2)     N(2A)     C(13A)    59(3)      . . . . yes
 C(04A)    Rh(2)     N(3A)     C(21A)    178.9(8)   . . . . yes
 C(04A)    Rh(2)     N(3A)     C(25A)    1.9(10)    . . . . yes
 C(04B)    Rh(4)     N(2B)     C(13B)    -4(6)      . . . . yes
 C(04B)    Rh(4)     N(3B)     C(21B)    -173.3(8)  . . . . yes
 C(04B)    Rh(4)     N(3B)     C(25B)    2(1)       . . . . yes
 C(11A)    N(1A)     N(2A)     C(13A)    0.5(10)    . . . . yes
 C(11A)    C(12A)    C(13A)    C(21A)    178(1)     . . . . yes
 C(11A)    C(14A)    P(1)      C(31A)    155.2(7)   . . . . yes
 C(11A)    C(14A)    P(1)      C(41A)    -89.7(8)   . . . . yes
 C(11B)    N(1B)     N(2B)     C(13B)    2(1)       . . . . yes
 C(11B)    C(12B)    C(13B)    C(21B)    177(1)     . . . . yes
 C(11B)    C(14B)    P(2)      C(31B)    -171.7(7)  . . . . yes
 C(11B)    C(14B)    P(2)      C(41B)    68.9(8)    . . . . yes
 C(12A)    C(13A)    C(21A)    C(22A)    9(1)       . . . . yes
 C(12B)    C(13B)    C(21B)    C(22B)    0(2)       . . . . yes
 C(13A)    C(12A)    C(11A)    C(14A)    179(1)     . . . . yes
 C(13A)    C(21A)    N(3A)     C(25A)    178.7(9)   . . . . yes
 C(13A)    C(21A)    C(22A)    C(23A)    -178.5(10) . . . . yes
 C(13B)    C(12B)    C(11B)    C(14B)    -177(1)    . . . . yes
 C(13B)    C(21B)    N(3B)     C(25B)    179.4(10)  . . . . yes
 C(13B)    C(21B)    C(22B)    C(23B)    179(1)     . . . . yes
 C(14A)    P(1)      C(31A)    C(32A)    93.3(10)   . . . . yes
 C(14A)    P(1)      C(31A)    C(36A)    -84.2(10)  . . . . yes
 C(14A)    P(1)      C(41A)    C(42A)    166.4(7)   . . . . yes
 C(14A)    P(1)      C(41A)    C(46A)    -14.3(9)   . . . . yes
 C(14B)    P(2)      C(31B)    C(32B)    140.3(8)   . . . . yes
 C(14B)    P(2)      C(31B)    C(36B)    -35(1)     . . . . yes
 C(14B)    P(2)      C(41B)    C(42B)    46(1)      . . . . yes
 C(14B)    P(2)      C(41B)    C(46B)    -129.9(9)  . . . . yes
 C(21A)    N(3A)     C(25A)    C(24A)    -1(1)      . . . . yes
 C(21A)    C(22A)    C(23A)    C(24A)    1(1)       . . . . yes
 C(21B)    N(3B)     C(25B)    C(24B)    0(1)       . . . . yes
 C(21B)    C(22B)    C(23B)    C(24B)    2(1)       . . . . yes
 C(22A)    C(21A)    N(3A)     C(25A)    0(1)       . . . . yes
 C(22A)    C(23A)    C(24A)    C(25A)    -2(1)      . . . . yes
 C(22B)    C(21B)    N(3B)     C(25B)    0(1)       . . . . yes
 C(22B)    C(23B)    C(24B)    C(25B)    -3(1)      . . . . yes
 C(31A)    P(1)      C(41A)    C(42A)    -79.7(8)   . . . . yes
 C(31A)    P(1)      C(41A)    C(46A)    99.6(9)    . . . . yes
 C(31A)    C(32A)    C(33A)    C(34A)    1(1)       . . . . yes
 C(31A)    C(36A)    C(35A)    C(34A)    0(1)       . . . . yes
 C(31B)    P(2)      C(41B)    C(42B)    -69(1)     . . . . yes
 C(31B)    P(2)      C(41B)    C(46B)    114.2(10)  . . . . yes
 C(31B)    C(32B)    C(33B)    C(34B)    3(1)       . . . . yes
 C(31B)    C(36B)    C(35B)    C(34B)    -3(1)      . . . . yes
 C(32A)    C(31A)    P(1)      C(41A)    -23(1)     . . . . yes
 C(32A)    C(31A)    C(36A)    C(35A)    1(1)       . . . . yes
 C(32A)    C(33A)    C(34A)    C(35A)    -1(1)      . . . . yes
 C(32B)    C(31B)    P(2)      C(41B)    -102.6(9)  . . . . yes
 C(32B)    C(31B)    C(36B)    C(35B)    3(1)       . . . . yes
 C(32B)    C(33B)    C(34B)    C(35B)    -4(1)      . . . . yes
 C(33A)    C(32A)    C(31A)    C(36A)    -1(1)      . . . . yes
 C(33A)    C(34A)    C(35A)    C(36A)    0(1)       . . . . yes
 C(33B)    C(32B)    C(31B)    C(36B)    -3(1)      . . . . yes
 C(33B)    C(34B)    C(35B)    C(36B)    4(1)       . . . . yes
 C(36A)    C(31A)    P(1)      C(41A)    159.1(9)   . . . . yes
 C(36B)    C(31B)    P(2)      C(41B)    81.4(10)   . . . . yes
 C(41A)    C(42A)    C(43A)    C(44A)    0(1)       . . . . yes
 C(41A)    C(46A)    C(45A)    C(44A)    1(1)       . . . . yes
 C(41B)    C(42B)    C(43B)    C(44B)    3(2)       . . . . yes
 C(41B)    C(46B)    C(45B)    C(44B)    1(2)       . . . . yes
 C(42A)    C(41A)    C(46A)    C(45A)    -2(1)      . . . . yes
 C(42A)    C(43A)    C(44A)    C(45A)    0(1)       . . . . yes
 C(42B)    C(41B)    C(46B)    C(45B)    0(1)       . . . . yes
 C(42B)    C(43B)    C(44B)    C(45B)    0(2)       . . . . yes
 C(43A)    C(42A)    C(41A)    C(46A)    2(1)       . . . . yes
 C(43A)    C(44A)    C(45A)    C(46A)    0(1)       . . . . yes
 C(43B)    C(42B)    C(41B)    C(46B)    -3(1)      . . . . yes
 C(43B)    C(44B)    C(45B)    C(46B)    -1(2)      . . . . yes
 C(43B)    C(44B)    C(45B)    C(46B)    -1(2)      . . . . yes
#------------------------------------------------------------------------------
loop_
_geom_contact_atom_site_label_1
_geom_contact_atom_site_label_2
_geom_contact_distance
_geom_contact_site_symmetry_1
_geom_contact_site_symmetry_2
_geom_contact_publ_flag
 Rh(1)     F(8)      3.57(1)    . 1_455 ?
 Rh(2)     Rh(2)     3.327(2)   . 2_556 ?
 Cl(1)     C(25A)    3.48(1)    . 1_655 ?
 Cl(1)     N(3A)     3.60(1)    . 1_655 ?
 Cl(2)     O(03A)    3.283(10)  . 2_556 ?
 Cl(2)     C(04A)    3.56(1)    . 1_655 ?
 F(1)      C(42A)    3.30(1)    . 1_665 ?
 F(1)      O(01A)    3.39(1)    . 1_665 ?
 F(2)      C(51)     3.30(2)    . 2_666 ?
 F(2)      C(24A)    3.52(1)    . 2_666 ?
 F(3)      C(23B)    3.16(2)    . 1_655 ?
 F(3)      C(24B)    3.19(2)    . 1_655 ?
 F(4)      C(45A)    3.38(2)    . 1_565 ?
 F(4)      C(44A)    3.41(2)    . 1_565 ?
 F(4)      C(51)     3.42(2)    . 2_666 ?
 F(5)      O(04B)    3.07(1)    . 1_655 ?
 F(5)      C(36A)    3.26(2)    . 1_655 ?
 F(5)      C(25B)    3.31(1)    . 1_655 ?
 F(5)      C(35A)    3.33(2)    . 1_655 ?
 F(5)      C(04B)    3.54(2)    . 1_655 ?
 F(7)      C(43B)    3.22(2)    . 1_545 ?
 F(7)      C(44B)    3.42(2)    . 1_545 ?
 F(7)      O(01A)    3.52(1)    . 1_655 ?
 F(8)      C(02A)    2.94(2)    . 1_655 ?
 F(8)      O(02A)    2.98(1)    . 1_655 ?
 F(8)      C(01A)    3.16(2)    . 1_655 ?
 F(8)      C(24B)    3.27(2)    . 1_655 ?
 F(8)      C(25B)    3.47(2)    . 1_655 ?
 F(8)      O(01A)    3.47(2)    . 1_655 ?
 O(01A)    C(43B)    3.50(2)    . 1_445 ?
 O(01B)    O(02B)    2.93(1)    . 2_555 ?
 O(01B)    O(04B)    3.01(1)    . 1_655 ?
 O(01B)    C(33A)    3.23(2)    . 2_555 ?
 O(01B)    C(34A)    3.33(2)    . 2_555 ?
 O(01B)    O(03B)    3.42(2)    . 2_555 ?
 O(01B)    C(03B)    3.44(2)    . 2_555 ?
 O(02A)    O(03A)    2.98(1)    . 2_456 ?
 O(02A)    C(03A)    3.58(2)    . 2_456 ?
 O(02B)    C(01B)    3.20(2)    . 2_555 ?
 O(02B)    O(03B)    3.23(2)    . 2_555 ?
 O(03A)    C(22A)    3.28(1)    . 2_556 ?
 O(03A)    C(21A)    3.33(1)    . 2_556 ?
 O(03A)    C(23A)    3.34(1)    . 2_556 ?
 O(03A)    C(24A)    3.40(2)    . 2_556 ?
 O(03A)    N(3A)     3.44(1)    . 2_556 ?
 O(03A)    C(25A)    3.48(2)    . 2_556 ?
 O(03B)    C(35A)    3.37(1)    . 2_455 ?
 O(03B)    C(44B)    3.54(2)    . 2_565 ?
 O(03B)    C(45B)    3.57(2)    . 2_565 ?
 O(04A)    C(46A)    3.05(1)    . 2_556 ?
 O(04A)    C(12A)    3.30(1)    . 2_556 ?
 O(04A)    C(11A)    3.35(1)    . 2_556 ?
 O(04A)    C(45A)    3.40(2)    . 2_556 ?
 O(04B)    C(01B)    3.05(2)    . 1_455 ?
 N(2A)     C(04A)    3.48(2)    . 2_556 ?
 N(2B)     C(34B)    3.60(2)    . 1_455 ?
 N(3A)     C(03A)    3.25(2)    . 2_556 ?
 C(03A)    C(21A)    3.34(2)    . 2_556 ?
 C(03A)    C(25A)    3.56(2)    . 2_556 ?
 C(04A)    C(13A)    3.42(1)    . 2_556 ?
 C(04A)    C(12A)    3.57(1)    . 2_556 ?
 C(13B)    C(35B)    3.59(2)    . 1_455 ?
 C(21B)    C(35B)    3.40(2)    . 1_455 ?
 C(32A)    C(35B)    3.47(2)    . 1_445 ?
 C(35A)    C(43B)    3.37(2)    . 1_445 ?
#------------------------------------------------------------------------------
#===END
data_General 
_audit_creation_date                  'Sat Oct 11 01:55:36 2003'
_audit_creation_method                'by teXsan'
_audit_update_record                   ?
#------------------------------------------------------------------------------
data_compound 5
#------------------------------------------------------------------------------
# CHEMICAL DATA 
_chemical_formula_sum                  'C27 H24 B Cl2 F4 Ir N3 O2 P Pd '
_chemical_formula_moiety               '?'
_chemical_formula_weight               909.81
_chemical_melting_point                ?
#------------------------------------------------------------------------------
# CRYSTAL DATA 
_symmetry_cell_setting                 monoclinic
_symmetry_space_group_name_H-M        'P 1 21/c 1'
_symmetry_Int_Tables_number            14
loop_
_symmetry_equiv_pos_as_xyz
x,y,z
-x,1/2+y,1/2-z
-x,-y,-z
x,1/2-y,1/2+z
_cell_length_a                         9.239(7)
_cell_length_b                         9.09(1)
_cell_length_c                         36.77(2)
_cell_angle_alpha                      90
_cell_angle_beta                       96.01(9)
_cell_angle_gamma                      90
_cell_volume                           3069(4)
_cell_formula_units_Z                  4
_cell_measurement_reflns_used          7
_cell_measurement_theta_min            9.7
_cell_measurement_theta_max            10.7
_cell_measurement_temperature          298
#------------------------------------------------------------------------------
_exptl_crystal_description            'prismatic'
_exptl_crystal_colour                 'colorless'
_exptl_crystal_size_max                0.200
_exptl_crystal_size_mid                0.200
_exptl_crystal_size_min                0.200
_exptl_crystal_size_rad                ?
_exptl_crystal_density_diffrn          1.968
_exptl_crystal_density_meas            ?
_exptl_crystal_density_method         'not measured'
_exptl_absorpt_coefficient_mu          5.209
_exptl_absorpt_correction_type         psi-scan
_exptl_absorpt_process_details        '(North, Phillips & Mathews, 1968)'
_exptl_absorpt_correction_T_min        0.664
_exptl_absorpt_correction_T_max        0.999
#------------------------------------------------------------------------------
# EXPERIMENTAL DATA 
_diffrn_ambient_temperature            298
_diffrn_radiation_type                'Mo K\a'
_diffrn_radiation_wavelength           0.7107
_diffrn_measurement_device_type       'Rigaku AFC7R'
_diffrn_measurement_method             \w-2\q
_diffrn_reflns_number                  7930
_diffrn_reflns_av_R_equivalents        0.017
_diffrn_reflns_theta_min               ?
_diffrn_reflns_theta_max               27.51
_diffrn_reflns_limit_h_min             0
_diffrn_reflns_limit_h_max             11
_diffrn_reflns_limit_k_min             0
_diffrn_reflns_limit_k_max             11
_diffrn_reflns_limit_l_min             -47
_diffrn_reflns_limit_l_max             47
_diffrn_standards_number              3
_diffrn_standards_interval_count      150
_diffrn_standards_decay_%             8.56
#------------------------------------------------------------------------------
# REFINEMENT DATA 
_refine_special_details
;
Refinement using reflections with F^2^ > -10.0 sigma(F^2^). The weighted 
R-factor (wR) and goodness of fit (S) are based on F^2^. R-factor (gt) are 
based on F. The threshold expression of F^2^ > 2.0 sigma(F^2^) is used only 
for calculating R-factor (gt).
;
_reflns_number_total                   7028
_reflns_number_gt                      4568
_reflns_threshold_expression                >2.0sigma(I)
_refine_ls_structure_factor_coef            Fsqd
_refine_ls_R_factor_gt                 0.0438
_refine_ls_wR_factor_ref               0.1599
_refine_ls_hydrogen_treatment          noref
_refine_ls_number_reflns               4568
_refine_ls_number_parameters           368
_refine_ls_goodness_of_fit_ref         1.020
_refine_ls_weighting_scheme            calc
_refine_ls_weighting_details               
   'w = 1/[\s^2^(Fo^2^) + (0.1000P)^2^+0.0000P] where P=(Fo^2^+2Fc^2^)/3'
_refine_ls_shift/su_max                0.0280
_refine_ls_extinction_method           SHELXL
_refine_ls_extinction_coef             0.0000
_refine_ls_extinction_expression
 'Fc^*^=kFc[1+0.001xFc^2^\l^3^/sin(2\q)]^-1/4^'
_refine_diff_density_max               0.82
_refine_diff_density_min               -1.21
loop_
_atom_type_symbol
_atom_type_description
_atom_type_scat_dispersion_real
_atom_type_scat_dispersion_imag
_atom_type_scat_source
  'C' 'C'  0.003 0.002 
;International Tables for Crystallography
(1992, Vol. C, Tables 4.2.6.8 and 6.1.1.4)
;
  'H' 'H'  0.000 0.000 
;International Tables for Crystallography
(1992, Vol. C, Table 6.1.1.4)
;
  'N' 'N'  0.006 0.003 
;International Tables for Crystallography
(1992, Vol. C, Tables 4.2.6.8 and 6.1.1.4)
;
  'O' 'O'  0.011 0.006 
;International Tables for Crystallography
(1992, Vol. C, Tables 4.2.6.8 and 6.1.1.4)
;
  'B' 'B'  0.001 0.001 
;International Tables for Crystallography
(1992, Vol. C, Tables 4.2.6.8 and 6.1.1.4)
;
  'F' 'F'  0.017 0.010 
;International Tables for Crystallography
(1992, Vol. C, Tables 4.2.6.8 and 6.1.1.4)
;
  'P' 'P'  0.102 0.094 
;International Tables for Crystallography
(1992, Vol. C, Tables 4.2.6.8 and 6.1.1.4)
;
  'Ir' 'Ir'  -1.444 7.990 
;International Tables for Crystallography
(1992, Vol. C, Tables 4.2.6.8 and 6.1.1.4)
;
  'Pd' 'Pd'  -0.999 1.007 
;International Tables for Crystallography
(1992, Vol. C, Tables 4.2.6.8 and 6.1.1.4)
;
  'Cl' 'Cl'  0.148 0.159 
;International Tables for Crystallography
(1992, Vol. C, Tables 4.2.6.8 and 6.1.1.4)
;
#------------------------------------------------------------------------------
# ATOMIC COORDINATES AND DISPLACEMENT PARAMETERS 
loop_
_atom_site_label
_atom_site_type_symbol
_atom_site_fract_x
_atom_site_fract_y
_atom_site_fract_z
_atom_site_U_iso_or_equiv
_atom_site_adp_type
_atom_site_occupancy
_atom_site_calc_flag
_atom_site_refinement_flags
_atom_site_disorder_assembly
_atom_site_disorder_group
 Ir(1)  Ir 0.11726(3)  0.14252(4)  -0.00170(1) 0.0557(1)   Uani 1.00 d . . .
 Pd(1)  Pd 0.36166(6)  0.13509(6)  0.10562(2)  0.0540(2)   Uani 1.00 d . . .
 Cl(1)  Cl 0.8163(8)   0.2315(10)  0.2150(2)   0.22846(4)  Uiso 1.00 d . . .
 Cl(2)  Cl 0.8932(9)   -0.026(1)   0.2600(2)   0.25278(4)  Uiso 1.00 d . . .
 P(1)   P  0.2380(3)   0.1116(2)   0.15585(5)  0.0537(5)   Uani 1.00 d . . .
 F(1)   F  0.4487(7)   0.4812(8)   0.1274(2)   0.108(2)    Uani 1.00 d . . .
 F(2)   F  0.6904(7)   0.4800(9)   0.1433(2)   0.123(3)    Uani 1.00 d . . .
 F(3)   F  0.5715(8)   0.6944(8)   0.1334(2)   0.119(2)    Uani 1.00 d . . .
 F(4)   F  0.6008(9)   0.5395(10)  0.0868(2)   0.127(3)    Uani 1.00 d . . .
 O(1)   O  0.1244(8)   0.045(1)    -0.0791(2)  0.098(2)    Uani 1.00 d . . .
 O(2)   O  0.3519(7)   -0.0779(8)  0.0186(2)   0.080(2)    Uani 1.00 d . . .
 N(1)   N  0.1542(7)   0.2071(7)   0.0831(2)   0.050(1)    Uani 1.00 d . . .
 N(2)   N  0.0926(7)   0.2298(7)   0.0485(2)   0.052(1)    Uani 1.00 d . . .
 N(3)   N  -0.0564(7)  0.2901(8)   -0.0139(2)  0.064(2)    Uani 1.00 d . . .
 C(01)  C  0.1222(9)   0.081(1)    -0.0498(2)  0.070(2)    Uani 1.00 d . . .
 C(1)   C  0.525(1)    0.180(1)    0.0666(3)   0.077(3)    Uani 1.00 d . . .
 C(02)  C  0.2684(10)  0.0104(10)  0.0121(2)   0.060(2)    Uani 1.00 d . . .
 C(2)   C  0.5674(9)   0.070(1)    0.0892(3)   0.081(3)    Uani 1.00 d . . .
 C(3)   C  0.574(1)    0.089(1)    0.1270(3)   0.087(3)    Uani 1.00 d . . .
 C(11)  C  0.0624(8)   0.2691(8)   0.1058(2)   0.049(2)    Uani 1.00 d . . .
 C(12)  C  -0.0537(9)  0.3348(8)   0.0866(2)   0.058(2)    Uani 1.00 d . . .
 C(13)  C  -0.0349(8)  0.3073(9)   0.0504(2)   0.055(2)    Uani 1.00 d . . .
 C(14)  C  0.102(1)    0.2584(9)   0.1461(2)   0.065(2)    Uani 1.00 d . . .
 C(21)  C  -0.1126(8)  0.3483(9)   0.0153(3)   0.058(2)    Uani 1.00 d . . .
 C(22)  C  -0.2372(9)  0.438(1)    0.0116(3)   0.071(2)    Uani 1.00 d . . .
 C(23)  C  -0.302(1)   0.469(1)    -0.0238(3)  0.088(3)    Uani 1.00 d . . .
 C(24)  C  -0.239(1)   0.414(1)    -0.0526(3)  0.089(3)    Uani 1.00 d . . .
 C(25)  C  -0.119(1)   0.325(1)    -0.0478(3)  0.076(3)    Uani 1.00 d . . .
 C(31)  C  0.312(1)    0.1485(9)   0.2032(2)   0.065(2)    Uani 1.00 d . . .
 C(32)  C  0.418(2)    0.252(2)    0.2113(3)   0.122(5)    Uani 1.00 d . . .
 C(33)  C  0.466(2)    0.283(2)    0.2469(4)   0.147(7)    Uani 1.00 d . . .
 C(34)  C  0.416(2)    0.218(2)    0.2738(3)   0.115(5)    Uani 1.00 d . . .
 C(35)  C  0.314(2)    0.118(1)    0.2670(3)   0.093(3)    Uani 1.00 d . . .
 C(36)  C  0.260(1)    0.082(1)    0.2319(3)   0.077(3)    Uani 1.00 d . . .
 C(41)  C  0.1394(8)   -0.0622(8)  0.1564(2)   0.050(2)    Uani 1.00 d . . .
 C(42)  C  -0.0049(10) -0.074(1)   0.1619(3)   0.074(2)    Uani 1.00 d . . .
 C(43)  C  -0.071(1)   -0.210(1)   0.1609(3)   0.080(3)    Uani 1.00 d . . .
 C(44)  C  0.008(1)    -0.332(1)   0.1549(3)   0.093(3)    Uani 1.00 d . . .
 C(45)  C  0.148(1)    -0.323(1)   0.1489(3)   0.091(3)    Uani 1.00 d . . .
 C(46)  C  0.218(1)    -0.1876(10) 0.1497(3)   0.069(2)    Uani 1.00 d . . .
 C(51)  C  0.892(4)    0.191(5)    0.258(1)    0.1867(2)   Uiso 0.58 d P . .
 C(52)  C  0.773(5)    0.032(6)    0.242(1)    0.1581(2)   Uiso 0.42 d P . .
 B(1)   B  0.581(1)    0.550(2)    0.1224(3)   0.082(3)    Uani 1.00 d . . .
 H(1)   H  0.5768      0.2720      0.0683      0.0933      Uiso 1.00 calc . . .
 H(2)   H  0.4983      0.1613      0.0408      0.0933      Uiso 1.00 calc . . .
 H(3)   H  0.5774      -0.0273     0.0796      0.0975      Uiso 1.00 calc . . .
 H(4)   H  0.5921      0.0063      0.1427      0.1073      Uiso 1.00 calc . . .
 H(5)   H  0.6332      0.1699      0.1375      0.1073      Uiso 1.00 calc . . .
 H(6)   H  -0.1306     0.3886      0.0957      0.0702      Uiso 1.00 calc . . .
 H(7)   H  0.1398      0.3509      0.1553      0.0783      Uiso 1.00 calc . . .
 H(8)   H  0.0160      0.2373      0.1579      0.0783      Uiso 1.00 calc . . .
 H(9)   H  -0.2744     0.4760      0.0335      0.0877      Uiso 1.00 calc . . .
 H(10)  H  -0.3922     0.5278      -0.0270     0.1103      Uiso 1.00 calc . . .
 H(11)  H  -0.2794     0.4363      -0.0773     0.1083      Uiso 1.00 calc . . .
 H(12)  H  -0.0734     0.2880      -0.0689     0.0917      Uiso 1.00 calc . . .
 H(13)  H  0.4642      0.3007      0.1916      0.1492      Uiso 1.00 calc . . .
 H(14)  H  0.5329      0.3648      0.2518      0.1779      Uiso 1.00 calc . . .
 H(15)  H  0.4539      0.2397      0.2989      0.1341      Uiso 1.00 calc . . .
 H(16)  H  0.2811      0.0671      0.2875      0.1142      Uiso 1.00 calc . . .
 H(17)  H  0.1817      0.0081      0.2280      0.0946      Uiso 1.00 calc . . .
 H(18)  H  -0.0619     0.0137      0.1659      0.0859      Uiso 1.00 calc . . .
 H(19)  H  -0.1721     -0.2154     0.1647      0.0953      Uiso 1.00 calc . . .
 H(20)  H  -0.0353     -0.4264     0.1542      0.1104      Uiso 1.00 calc . . .
 H(21)  H  0.2014      -0.4113     0.1450      0.1072      Uiso 1.00 calc . . .
 H(22)  H  0.3183      -0.1810     0.1455      0.0843      Uiso 1.00 calc . . .

loop_
_atom_site_aniso_label
_atom_site_aniso_U_11
_atom_site_aniso_U_22
_atom_site_aniso_U_33
_atom_site_aniso_U_12
_atom_site_aniso_U_13
_atom_site_aniso_U_23
 Ir(1)  0.0520(2)   0.0705(2)   0.0450(2)   -0.0034(2)  0.0077(1)   -0.0031(1) 
 Pd(1)  0.0557(3)   0.0532(3)   0.0527(3)   -0.0031(3)  0.0033(3)   0.0005(3)  
 P(1)   0.070(1)    0.046(1)    0.0445(10)  -0.0059(9)  0.0037(9)   -0.0012(8) 
 F(1)   0.077(4)    0.119(5)    0.126(5)    -0.010(4)   0.007(4)    0.004(4)   
 F(2)   0.093(5)    0.142(6)    0.124(6)    0.026(4)    -0.028(4)   -0.004(5)  
 F(3)   0.123(5)    0.095(5)    0.139(6)    -0.001(4)   0.013(5)    -0.044(4)  
 F(4)   0.157(7)    0.152(7)    0.077(4)    0.007(6)    0.030(4)    -0.016(4)  
 O(1)   0.100(5)    0.141(7)    0.052(4)    0.000(5)    0.005(3)    -0.019(4)  
 O(2)   0.085(4)    0.069(4)    0.084(5)    0.017(4)    0.002(4)    -0.008(4)  
 N(1)   0.057(3)    0.050(3)    0.045(3)    0.000(3)    0.005(3)    0.005(3)   
 N(2)   0.052(3)    0.058(4)    0.045(3)    -0.001(3)   -0.001(3)   0.002(3)   
 N(3)   0.063(4)    0.074(4)    0.053(4)    -0.003(4)   0.002(3)    0.004(3)   
 C(01)  0.052(4)    0.104(7)    0.053(5)    0.001(5)    -0.002(4)   0.003(5)   
 C(1)   0.068(6)    0.083(6)    0.083(7)    -0.013(5)   0.027(5)    -0.001(5)  
 C(02)  0.067(5)    0.061(5)    0.053(4)    -0.013(4)   0.008(4)    -0.007(4)  
 C(2)   0.048(5)    0.082(7)    0.115(8)    0.003(5)    0.013(5)    -0.007(6)  
 C(3)   0.059(5)    0.123(9)    0.078(7)    -0.003(6)   -0.006(5)   -0.001(6)  
 C(11)  0.053(4)    0.048(4)    0.048(4)    0.001(3)    0.011(3)    -0.003(3)  
 C(12)  0.070(5)    0.046(4)    0.058(5)    0.007(4)    0.010(4)    -0.001(3)  
 C(13)  0.051(4)    0.052(4)    0.061(5)    -0.002(3)   0.007(3)    0.000(4)   
 C(14)  0.096(6)    0.048(4)    0.051(4)    -0.001(4)   0.013(4)    -0.002(3)  
 C(21)  0.043(4)    0.064(5)    0.067(5)    -0.010(4)   -0.001(3)   0.005(4)   
 C(22)  0.055(5)    0.070(6)    0.088(6)    0.012(4)    0.004(4)    0.006(5)   
 C(23)  0.083(7)    0.093(7)    0.085(7)    0.010(6)    -0.012(6)   0.022(6)   
 C(24)  0.112(9)    0.089(7)    0.061(6)    -0.007(6)   -0.010(6)   0.018(5)   
 C(25)  0.073(6)    0.101(7)    0.053(5)    -0.002(5)   0.004(4)    0.016(5)   
 C(31)  0.081(6)    0.067(5)    0.046(4)    -0.002(4)   0.001(4)    0.002(4)   
 C(32)  0.15(1)     0.15(1)     0.072(7)    -0.09(1)    0.005(7)    -0.011(7)  
 C(33)  0.18(2)     0.18(2)     0.083(9)    -0.08(1)    -0.011(9)   -0.04(1)   
 C(34)  0.15(1)     0.14(1)     0.055(6)    -0.04(1)    -0.022(7)   -0.012(7)  
 C(35)  0.128(10)   0.094(8)    0.054(5)    0.009(7)    -0.007(6)   0.007(5)   
 C(36)  0.102(7)    0.071(5)    0.056(5)    -0.009(5)   -0.007(5)   0.005(4)   
 C(41)  0.067(5)    0.039(4)    0.045(4)    -0.004(3)   0.003(3)    -0.003(3)  
 C(42)  0.065(5)    0.067(6)    0.088(7)    0.001(5)    0.001(5)    -0.007(5)  
 C(43)  0.074(6)    0.075(6)    0.092(7)    -0.014(5)   0.011(5)    0.002(5)   
 C(44)  0.115(9)    0.069(7)    0.096(8)    -0.030(6)   0.013(7)    -0.005(5)  
 C(45)  0.124(10)   0.050(5)    0.106(8)    -0.005(5)   0.049(7)    -0.005(5)  
 C(46)  0.076(6)    0.053(4)    0.081(6)    0.002(4)    0.019(5)    -0.003(4)  
 B(1)   0.076(7)    0.094(9)    0.072(7)    0.021(6)    -0.012(6)   -0.013(6)  
#------------------------------------------------------------------------------
_computing_data_collection            'MSC/AFC Diffractometer Control'
_computing_cell_refinement            'MSC/AFC Diffractometer Control'
_computing_data_reduction             'teXsan Ver. 1.11'
_computing_structure_solution          SHELXS86
_computing_structure_refinement       'SHELXL97'
_computing_publication_material       'teXsan Ver. 1.11'
_computing_molecular_graphics          ?
#------------------------------------------------------------------------------
_geom_special_details
;
 ?
;
loop_
_geom_bond_atom_site_label_1
_geom_bond_atom_site_label_2
_geom_bond_distance
_geom_bond_site_symmetry_1
_geom_bond_site_symmetry_2
_geom_bond_publ_flag
 Ir(1)     N(2)      2.042(6)   . . yes
 Ir(1)     N(3)      2.103(7)   . . yes
 Ir(1)     C(01)     1.859(9)   . . yes
 Ir(1)     C(02)     1.871(9)   . . yes
 Pd(1)     P(1)      2.281(2)   . . yes
 Pd(1)     N(1)      2.111(6)   . . yes
 Pd(1)     C(1)      2.23(1)    . . yes
 Pd(1)     C(2)      2.138(10)  . . yes
 Pd(1)     C(3)      2.075(10)  . . yes
 Cl(1)     C(51)     1.71(4)    . . yes
 Cl(1)     C(52)     2.13(5)    . . yes
 Cl(2)     C(51)     1.98(5)    . . yes
 Cl(2)     C(52)     1.34(5)    . . yes
 P(1)      C(14)     1.844(9)   . . yes
 P(1)      C(31)     1.831(8)   . . yes
 P(1)      C(41)     1.824(7)   . . yes
 F(1)      B(1)      1.40(1)    . . yes
 F(2)      B(1)      1.36(1)    . . yes
 F(3)      B(1)      1.38(2)    . . yes
 F(4)      B(1)      1.34(1)    . . yes
 O(1)      C(01)     1.13(1)    . . yes
 O(2)      C(02)     1.12(1)    . . yes
 N(1)      N(2)      1.355(8)   . . yes
 N(1)      C(11)     1.371(10)  . . yes
 N(2)      C(13)     1.38(1)    . . yes
 N(3)      C(21)     1.35(1)    . . yes
 N(3)      C(25)     1.35(1)    . . yes
 C(1)      C(2)      1.34(2)    . . yes
 C(2)      C(3)      1.40(2)    . . yes
 C(11)     C(12)     1.36(1)    . . yes
 C(11)     C(14)     1.49(1)    . . yes
 C(12)     C(13)     1.38(1)    . . yes
 C(13)     C(21)     1.46(1)    . . yes
 C(21)     C(22)     1.40(1)    . . yes
 C(22)     C(23)     1.40(1)    . . yes
 C(23)     C(24)     1.35(2)    . . yes
 C(24)     C(25)     1.37(2)    . . yes
 C(31)     C(32)     1.37(2)    . . yes
 C(31)     C(36)     1.35(1)    . . yes
 C(32)     C(33)     1.37(2)    . . yes
 C(33)     C(34)     1.28(2)    . . yes
 C(34)     C(35)     1.31(2)    . . yes
 C(35)     C(36)     1.38(1)    . . yes
 C(41)     C(42)     1.37(1)    . . yes
 C(41)     C(46)     1.39(1)    . . yes
 C(42)     C(43)     1.37(1)    . . yes
 C(43)     C(44)     1.36(2)    . . yes
 C(44)     C(45)     1.33(2)    . . yes
 C(45)     C(46)     1.39(1)    . . yes
#------------------------------------------------------------------------------
loop_
_geom_angle_atom_site_label_1
_geom_angle_atom_site_label_2
_geom_angle_atom_site_label_3
_geom_angle
_geom_angle_site_symmetry_1
_geom_angle_site_symmetry_2
_geom_angle_site_symmetry_3
_geom_angle_publ_flag
   N(2)      Ir(1)     N(3)      77.9(3)    . . . yes
   N(2)      Ir(1)     C(01)     172.6(3)   . . . yes
   N(2)      Ir(1)     C(02)     98.9(3)    . . . yes
   N(3)      Ir(1)     C(01)     94.7(3)    . . . yes
   N(3)      Ir(1)     C(02)     176.5(3)   . . . yes
   C(01)     Ir(1)     C(02)     88.5(4)    . . . yes
   P(1)      Pd(1)     N(1)      80.5(2)    . . . yes
   P(1)      Pd(1)     C(1)      165.9(3)   . . . yes
   P(1)      Pd(1)     C(2)      137.6(3)   . . . yes
   P(1)      Pd(1)     C(3)      102.0(3)   . . . yes
   N(1)      Pd(1)     C(1)      109.7(3)   . . . yes
   N(1)      Pd(1)     C(2)      140.6(4)   . . . yes
   N(1)      Pd(1)     C(3)      173.3(4)   . . . yes
   C(1)      Pd(1)     C(2)      35.6(4)    . . . yes
   C(1)      Pd(1)     C(3)      66.7(4)    . . . yes
   C(2)      Pd(1)     C(3)      38.6(4)    . . . yes
   C(51)     Cl(1)     C(52)     57(1)      . . . yes
   C(51)     Cl(2)     C(52)     65(2)      . . . yes
   Pd(1)     P(1)      C(14)     99.5(3)    . . . yes
   Pd(1)     P(1)      C(31)     125.8(3)   . . . yes
   Pd(1)     P(1)      C(41)     112.5(2)   . . . yes
   C(14)     P(1)      C(31)     103.3(4)   . . . yes
   C(14)     P(1)      C(41)     107.3(4)   . . . yes
   C(31)     P(1)      C(41)     106.5(4)   . . . yes
   Pd(1)     N(1)      N(2)      133.7(5)   . . . yes
   Pd(1)     N(1)      C(11)     118.9(4)   . . . yes
   N(2)      N(1)      C(11)     106.5(6)   . . . yes
   Ir(1)     N(2)      N(1)      135.6(5)   . . . yes
   Ir(1)     N(2)      C(13)     115.0(5)   . . . yes
   N(1)      N(2)      C(13)     107.7(6)   . . . yes
   Ir(1)     N(3)      C(21)     115.4(5)   . . . yes
   Ir(1)     N(3)      C(25)     125.9(6)   . . . yes
   C(21)     N(3)      C(25)     118.6(8)   . . . yes
   Ir(1)     C(01)     O(1)      179.1(9)   . . . yes
   Pd(1)     C(1)      C(2)      68.6(6)    . . . yes
   Ir(1)     C(02)     O(2)      173.9(8)   . . . yes
   Pd(1)     C(2)      C(1)      75.8(6)    . . . yes
   Pd(1)     C(2)      C(3)      68.3(6)    . . . yes
   C(1)      C(2)      C(3)      120(1)     . . . yes
   Pd(1)     C(3)      C(2)      73.1(5)    . . . yes
   N(1)      C(11)     C(12)     111.7(7)   . . . yes
   N(1)      C(11)     C(14)     118.4(7)   . . . yes
   C(12)     C(11)     C(14)     129.9(8)   . . . yes
   C(11)     C(12)     C(13)     104.4(7)   . . . yes
   N(2)      C(13)     C(12)     109.7(7)   . . . yes
   N(2)      C(13)     C(21)     115.2(7)   . . . yes
   C(12)     C(13)     C(21)     135.0(8)   . . . yes
   P(1)      C(14)     C(11)     109.2(6)   . . . yes
   N(3)      C(21)     C(13)     114.2(7)   . . . yes
   N(3)      C(21)     C(22)     122.1(8)   . . . yes
   C(13)     C(21)     C(22)     123.7(8)   . . . yes
   C(21)     C(22)     C(23)     118.1(9)   . . . yes
   C(22)     C(23)     C(24)     118.4(10)  . . . yes
   C(23)     C(24)     C(25)     121.7(9)   . . . yes
   N(3)      C(25)     C(24)     121.0(9)   . . . yes
   P(1)      C(31)     C(32)     121.2(8)   . . . yes
   P(1)      C(31)     C(36)     122.4(7)   . . . yes
   C(32)     C(31)     C(36)     116.3(9)   . . . yes
   C(31)     C(32)     C(33)     120(1)     . . . yes
   C(32)     C(33)     C(34)     122(1)     . . . yes
   C(33)     C(34)     C(35)     118(1)     . . . yes
   C(34)     C(35)     C(36)     121(1)     . . . yes
   C(31)     C(36)     C(35)     120(1)     . . . yes
   P(1)      C(41)     C(42)     124.3(6)   . . . yes
   P(1)      C(41)     C(46)     116.0(6)   . . . yes
   C(42)     C(41)     C(46)     119.7(8)   . . . yes
   C(41)     C(42)     C(43)     120.1(9)   . . . yes
   C(42)     C(43)     C(44)     119(1)     . . . yes
   C(43)     C(44)     C(45)     121(1)     . . . yes
   C(44)     C(45)     C(46)     120(1)     . . . yes
   C(41)     C(46)     C(45)     118.6(9)   . . . yes
   Cl(1)     C(51)     Cl(2)     104(2)     . . . yes
   Cl(1)     C(52)     Cl(2)     112(2)     . . . yes
   F(1)      B(1)      F(2)      108.9(10)  . . . yes
   F(1)      B(1)      F(3)      107.8(10)  . . . yes
   F(1)      B(1)      F(4)      107.9(9)   . . . yes
   F(2)      B(1)      F(3)      110.0(9)   . . . yes
   F(2)      B(1)      F(4)      110(1)     . . . yes
   F(3)      B(1)      F(4)      111(1)     . . . yes
#------------------------------------------------------------------------------
loop_
_geom_torsion_atom_site_label_1
_geom_torsion_atom_site_label_2
_geom_torsion_atom_site_label_3
_geom_torsion_atom_site_label_4
_geom_torsion
_geom_torsion_site_symmetry_1
_geom_torsion_site_symmetry_2
_geom_torsion_site_symmetry_3
_geom_torsion_site_symmetry_4
_geom_torsion_publ_flag
 Ir(1)     N(2)      N(1)      Pd(1)     29(1)      . . . . yes
 Ir(1)     N(2)      N(1)      C(11)     -162.7(6)  . . . . yes
 Ir(1)     N(2)      C(13)     C(12)     167.8(5)   . . . . yes
 Ir(1)     N(2)      C(13)     C(21)     -15.6(9)   . . . . yes
 Ir(1)     N(3)      C(21)     C(13)     4.7(9)     . . . . yes
 Ir(1)     N(3)      C(21)     C(22)     -174.0(6)  . . . . yes
 Ir(1)     N(3)      C(25)     C(24)     175.2(8)   . . . . yes
 Pd(1)     P(1)      C(14)     C(11)     33.7(6)    . . . . yes
 Pd(1)     P(1)      C(31)     C(32)     30(1)      . . . . yes
 Pd(1)     P(1)      C(31)     C(36)     -153.3(7)  . . . . yes
 Pd(1)     P(1)      C(41)     C(42)     -129.7(7)  . . . . yes
 Pd(1)     P(1)      C(41)     C(46)     48.5(7)    . . . . yes
 Pd(1)     N(1)      N(2)      C(13)     -167.2(5)  . . . . yes
 Pd(1)     N(1)      C(11)     C(12)     168.2(5)   . . . . yes
 Pd(1)     N(1)      C(11)     C(14)     -10.9(9)   . . . . yes
 Pd(1)     C(1)      C(2)      C(3)      -53.8(8)   . . . . yes
 Pd(1)     C(3)      C(2)      C(1)      57.4(9)    . . . . yes
 Cl(1)     C(51)     Cl(2)     C(52)     -40(2)     . . . . yes
 Cl(1)     C(52)     Cl(2)     C(51)     32(2)      . . . . yes
 Cl(2)     C(51)     Cl(1)     C(52)     26(1)      . . . . yes
 Cl(2)     C(52)     Cl(1)     C(51)     -43(2)     . . . . yes
 P(1)      Pd(1)     N(1)      N(2)      -165.9(7)  . . . . yes
 P(1)      Pd(1)     N(1)      C(11)     27.1(5)    . . . . yes
 P(1)      Pd(1)     C(1)      C(2)      69(1)      . . . . yes
 P(1)      Pd(1)     C(2)      C(1)      -160.3(5)  . . . . yes
 P(1)      Pd(1)     C(2)      C(3)      -28.9(9)   . . . . yes
 P(1)      Pd(1)     C(3)      C(2)      160.6(6)   . . . . yes
 P(1)      C(14)     C(11)     N(1)      -17.9(9)   . . . . yes
 P(1)      C(14)     C(11)     C(12)     163.1(7)   . . . . yes
 P(1)      C(31)     C(32)     C(33)     176(1)     . . . . yes
 P(1)      C(31)     C(36)     C(35)     -177.0(9)  . . . . yes
 P(1)      C(41)     C(42)     C(43)     178.3(7)   . . . . yes
 P(1)      C(41)     C(46)     C(45)     -178.5(8)  . . . . yes
 O(1)      C(01)     Ir(1)     N(2)      15(57)     . . . . yes
 O(1)      C(01)     Ir(1)     N(3)      22(55)     . . . . yes
 O(1)      C(01)     Ir(1)     C(02)     -159(55)   . . . . yes
 O(2)      C(02)     Ir(1)     N(2)      131(7)     . . . . yes
 O(2)      C(02)     Ir(1)     N(3)      105(7)     . . . . yes
 O(2)      C(02)     Ir(1)     C(01)     -48(7)     . . . . yes
 N(1)      Pd(1)     P(1)      C(14)     -29.5(3)   . . . . yes
 N(1)      Pd(1)     P(1)      C(31)     -143.5(4)  . . . . yes
 N(1)      Pd(1)     P(1)      C(41)     83.8(3)    . . . . yes
 N(1)      Pd(1)     C(1)      C(2)      -155.5(6)  . . . . yes
 N(1)      Pd(1)     C(2)      C(1)      38.0(9)    . . . . yes
 N(1)      Pd(1)     C(2)      C(3)      169.4(6)   . . . . yes
 N(1)      Pd(1)     C(3)      C(2)      -87(3)     . . . . yes
 N(1)      N(2)      Ir(1)     N(3)      176.4(7)   . . . . yes
 N(1)      N(2)      Ir(1)     C(01)     -176(2)    . . . . yes
 N(1)      N(2)      Ir(1)     C(02)     -2.0(7)    . . . . yes
 N(1)      N(2)      C(13)     C(12)     0.4(9)     . . . . yes
 N(1)      N(2)      C(13)     C(21)     177.0(6)   . . . . yes
 N(1)      C(11)     C(12)     C(13)     2.1(9)     . . . . yes
 N(2)      Ir(1)     N(3)      C(21)     -9.9(6)    . . . . yes
 N(2)      Ir(1)     N(3)      C(25)     173.5(8)   . . . . yes
 N(2)      N(1)      Pd(1)     C(1)      24.1(7)    . . . . yes
 N(2)      N(1)      Pd(1)     C(2)      1.7(9)     . . . . yes
 N(2)      N(1)      Pd(1)     C(3)      81(3)      . . . . yes
 N(2)      N(1)      C(11)     C(12)     -2.0(8)    . . . . yes
 N(2)      N(1)      C(11)     C(14)     178.9(6)   . . . . yes
 N(2)      C(13)     C(12)     C(11)     -1.5(9)    . . . . yes
 N(2)      C(13)     C(21)     N(3)      6(1)       . . . . yes
 N(2)      C(13)     C(21)     C(22)     -174.4(8)  . . . . yes
 N(3)      Ir(1)     N(2)      C(13)     13.7(5)    . . . . yes
 N(3)      C(21)     C(13)     C(12)     -177.5(9)  . . . . yes
 N(3)      C(21)     C(22)     C(23)     -1(1)      . . . . yes
 N(3)      C(25)     C(24)     C(23)     -1(1)      . . . . yes
 C(01)     Ir(1)     N(2)      C(13)     21(2)      . . . . yes
 C(01)     Ir(1)     N(3)      C(21)     171.0(6)   . . . . yes
 C(01)     Ir(1)     N(3)      C(25)     -5.6(8)    . . . . yes
 C(1)      Pd(1)     P(1)      C(14)     108(1)     . . . . yes
 C(1)      Pd(1)     P(1)      C(31)     -5(1)      . . . . yes
 C(1)      Pd(1)     P(1)      C(41)     -138(1)    . . . . yes
 C(1)      Pd(1)     N(1)      C(11)     -142.9(6)  . . . . yes
 C(1)      Pd(1)     C(2)      C(3)      131(1)     . . . . yes
 C(1)      Pd(1)     C(3)      C(2)      -28.4(6)   . . . . yes
 C(1)      C(2)      Pd(1)     C(3)      -131(1)    . . . . yes
 C(02)     Ir(1)     N(2)      C(13)     -164.8(6)  . . . . yes
 C(02)     Ir(1)     N(3)      C(21)     16(5)      . . . . yes
 C(02)     Ir(1)     N(3)      C(25)     -160(5)    . . . . yes
 C(2)      Pd(1)     P(1)      C(14)     162.2(5)   . . . . yes
 C(2)      Pd(1)     P(1)      C(31)     48.1(6)    . . . . yes
 C(2)      Pd(1)     P(1)      C(41)     -84.5(5)   . . . . yes
 C(2)      Pd(1)     N(1)      C(11)     -165.2(6)  . . . . yes
 C(2)      C(1)      Pd(1)     C(3)      30.6(7)    . . . . yes
 C(3)      Pd(1)     P(1)      C(14)     144.2(5)   . . . . yes
 C(3)      Pd(1)     P(1)      C(31)     30.2(5)    . . . . yes
 C(3)      Pd(1)     P(1)      C(41)     -102.5(5)  . . . . yes
 C(3)      Pd(1)     N(1)      C(11)     -85(3)     . . . . yes
 C(11)     N(1)      N(2)      C(13)     0.9(8)     . . . . yes
 C(11)     C(12)     C(13)     C(21)     -177.2(9)  . . . . yes
 C(11)     C(14)     P(1)      C(31)     164.1(6)   . . . . yes
 C(11)     C(14)     P(1)      C(41)     -83.6(6)   . . . . yes
 C(12)     C(13)     C(21)     C(22)     1(1)       . . . . yes
 C(13)     C(12)     C(11)     C(14)     -178.8(8)  . . . . yes
 C(13)     C(21)     N(3)      C(25)     -178.5(8)  . . . . yes
 C(13)     C(21)     C(22)     C(23)     179.9(9)   . . . . yes
 C(14)     P(1)      C(31)     C(32)     -81(1)     . . . . yes
 C(14)     P(1)      C(31)     C(36)     94.4(9)    . . . . yes
 C(14)     P(1)      C(41)     C(42)     -21.2(8)   . . . . yes
 C(14)     P(1)      C(41)     C(46)     156.9(6)   . . . . yes
 C(21)     N(3)      C(25)     C(24)     -1(1)      . . . . yes
 C(21)     C(22)     C(23)     C(24)     -1(1)      . . . . yes
 C(22)     C(21)     N(3)      C(25)     2(1)       . . . . yes
 C(22)     C(23)     C(24)     C(25)     2(1)       . . . . yes
 C(31)     P(1)      C(41)     C(42)     88.8(8)    . . . . yes
 C(31)     P(1)      C(41)     C(46)     -93.0(7)   . . . . yes
 C(31)     C(32)     C(33)     C(34)     0(2)       . . . . yes
 C(31)     C(36)     C(35)     C(34)     0(1)       . . . . yes
 C(32)     C(31)     P(1)      C(41)     165.2(10)  . . . . yes
 C(32)     C(31)     C(36)     C(35)     0(1)       . . . . yes
 C(32)     C(33)     C(34)     C(35)     0(2)       . . . . yes
 C(33)     C(32)     C(31)     C(36)     0(1)       . . . . yes
 C(33)     C(34)     C(35)     C(36)     0(2)       . . . . yes
 C(36)     C(31)     P(1)      C(41)     -18.4(9)   . . . . yes
 C(41)     C(42)     C(43)     C(44)     0(1)       . . . . yes
 C(41)     C(46)     C(45)     C(44)     0(1)       . . . . yes
 C(42)     C(41)     C(46)     C(45)     0(1)       . . . . yes
 C(42)     C(43)     C(44)     C(45)     -1(1)      . . . . yes
 C(43)     C(42)     C(41)     C(46)     0(1)       . . . . yes
 C(43)     C(44)     C(45)     C(46)     1(1)       . . . . yes
 C(43)     C(44)     C(45)     C(46)     1(1)       . . . . yes
#------------------------------------------------------------------------------
loop_
_geom_contact_atom_site_label_1
_geom_contact_atom_site_label_2
_geom_contact_distance
_geom_contact_site_symmetry_1
_geom_contact_site_symmetry_2
_geom_contact_publ_flag
 Ir(1)     Ir(1)     3.388(1)   . 3_555 ?
 Pd(1)     F(1)      3.324(7)   . . ?
 Cl(1)     Cl(2)     3.52(1)    . 2_755 ?
 Cl(1)     F(2)      3.57(1)    . . ?
 Cl(1)     C(33)     3.58(2)    . . ?
 Cl(2)     C(51)     3.36(4)    . 2_745 ?
 F(1)      C(24)     3.33(1)    . 3_565 ?
 F(1)      C(45)     3.46(1)    . 1_565 ?
 F(2)      C(44)     3.39(1)    . 1_665 ?
 F(2)      C(35)     3.53(1)    . 2_655 ?
 F(2)      C(12)     3.57(1)    . 1_655 ?
 F(2)      C(43)     3.60(1)    . 1_665 ?
 F(3)      C(34)     3.41(1)    . 2_655 ?
 F(3)      C(43)     3.46(1)    . 1_665 ?
 F(3)      C(46)     3.55(1)    . 1_565 ?
 F(3)      C(3)      3.60(2)    . 1_565 ?
 F(4)      C(1)      3.41(1)    . . ?
 F(4)      C(22)     3.41(1)    . 1_655 ?
 F(4)      C(23)     3.42(1)    . 3_565 ?
 F(4)      C(24)     3.47(1)    . 3_565 ?
 O(1)      C(2)      3.09(1)    . 3_655 ?
 O(1)      C(42)     3.14(1)    . 3_555 ?
 O(1)      C(43)     3.35(1)    . 3_555 ?
 O(1)      C(11)     3.43(1)    . 3_555 ?
 O(1)      N(1)      3.44(1)    . 3_555 ?
 O(1)      N(2)      3.47(1)    . 3_555 ?
 O(1)      C(13)     3.50(1)    . 3_555 ?
 O(1)      C(12)     3.52(1)    . 3_555 ?
 O(1)      C(41)     3.549(10)  . 3_555 ?
 O(2)      N(3)      3.33(1)    . 3_555 ?
 O(2)      C(25)     3.36(1)    . 3_555 ?
 O(2)      C(21)     3.45(1)    . 3_555 ?
 O(2)      O(2)      3.49(1)    . 3_655 ?
 O(2)      C(24)     3.50(1)    . 3_555 ?
 O(2)      C(1)      3.57(1)    . 3_655 ?
 O(2)      C(22)     3.58(1)    . 3_555 ?
 O(2)      C(23)     3.59(1)    . 3_555 ?
 N(2)      C(01)     3.46(1)    . 3_555 ?
 N(2)      C(24)     3.50(1)    . 3_565 ?
 N(2)      C(23)     3.52(1)    . 3_565 ?
 N(3)      C(02)     3.37(1)    . 3_555 ?
 C(13)     C(24)     3.57(1)    . 3_565 ?
 C(33)     C(52)     3.21(5)    . 2_655 ?
 C(34)     C(52)     3.37(5)    . 2_655 ?
 C(43)     C(51)     3.37(4)    . 2_645 ?
 C(44)     C(51)     3.24(4)    . 2_645 ?
 C(45)     C(51)     3.47(4)    . 2_645 ?
#------------------------------------------------------------------------------
#===END
data_General 
_audit_creation_date                  'Wed Jul 13 21:22:04 2005'
_audit_creation_method                'by teXsan'
_audit_update_record                   ?
#------------------------------------------------------------------------------
data_compound 6
#------------------------------------------------------------------------------
# CHEMICAL DATA 
_chemical_formula_sum                  'C52 H48 B2 Cl12 F8 Ir2 N2 O4 P2 '
_chemical_formula_moiety               'C52 H48 B2 Cl12 F8 Ir2 N2 O4 P2 '
_chemical_formula_weight               1810.39
_chemical_melting_point                ?
#------------------------------------------------------------------------------
# CRYSTAL DATA 
_symmetry_cell_setting                 triclinic
_symmetry_space_group_name_H-M        'P -1         '
_symmetry_Int_Tables_number            2
loop_
_symmetry_equiv_pos_as_xyz
x,y,z
-x,-y,-z
_cell_length_a                         13.235(7)
_cell_length_b                         14.245(9)
_cell_length_c                         19.86(1)
_cell_angle_alpha                      105.27(2)
_cell_angle_beta                       106.60(2)
_cell_angle_gamma                      98.09(2)
_cell_volume                           3366(3)
_cell_formula_units_Z                  2
_cell_measurement_reflns_used          26061
_cell_measurement_theta_min            3.0
_cell_measurement_theta_max            27.5
_cell_measurement_temperature          213
#------------------------------------------------------------------------------
_exptl_crystal_description            'unknown'
_exptl_crystal_colour                 'unknown'
_exptl_crystal_size_max                0.100
_exptl_crystal_size_mid                0.100
_exptl_crystal_size_min                0.100
_exptl_crystal_size_rad                ?
_exptl_crystal_density_diffrn          1.786
_exptl_crystal_density_meas            ?
_exptl_crystal_density_method         'not measured'
_exptl_absorpt_coefficient_mu          4.548
_exptl_absorpt_correction_type         multi-scan
_exptl_absorpt_process_details        '(Higashi, 1995)'
_exptl_absorpt_correction_T_min        0.361
_exptl_absorpt_correction_T_max        0.635
#------------------------------------------------------------------------------
# EXPERIMENTAL DATA 
_diffrn_ambient_temperature            213
_diffrn_radiation_type                'Mo K\a'
_diffrn_radiation_wavelength           0.7107
_diffrn_measurement_device_type       'Rigaku RAXIS-IV Imaging Plate'
_diffrn_measurement_method             \w
_diffrn_detector_area_resol_mean       10.00
_diffrn_reflns_number                  21506
_diffrn_reflns_av_R_equivalents        0.063
_diffrn_reflns_theta_min               ?
_diffrn_reflns_theta_max               27.47
_diffrn_reflns_limit_h_min             -17
_diffrn_reflns_limit_h_max             17
_diffrn_reflns_limit_k_min             -18
_diffrn_reflns_limit_k_max             18
_diffrn_reflns_limit_l_min             -25
_diffrn_reflns_limit_l_max             25
#------------------------------------------------------------------------------
# REFINEMENT DATA 
_refine_special_details
;
Refinement using reflections with F^2^ > -10.0 sigma(F^2^). The weighted 
R-factor (wR) and goodness of fit (S) are based on F^2^. R-factor (gt) are 
based on F. The threshold expression of F^2^ > 2.0 sigma(F^2^) is used only 
for calculating R-factor (gt).
;
_reflns_number_total                   13065
_reflns_number_gt                      8941
_reflns_threshold_expression                >2.0sigma(I)
_refine_ls_structure_factor_coef            Fsqd
_refine_ls_R_factor_gt                 0.0622
_refine_ls_wR_factor_ref               0.1691
_refine_ls_hydrogen_treatment          noref
_refine_ls_number_reflns               8941
_refine_ls_number_parameters           757
_refine_ls_goodness_of_fit_ref         1.033
_refine_ls_weighting_scheme            calc
_refine_ls_weighting_details               
   'w = 1/[\s^2^(Fo^2^) + (0.1000P)^2^+0.0000P] where P=(Fo^2^+2Fc^2^)/3'
_refine_ls_shift/su_max                -0.0030
_refine_ls_extinction_method           SHELXL
_refine_ls_extinction_coef             0.0000
_refine_ls_extinction_expression
 'Fc^*^=kFc[1+0.001xFc^2^\l^3^/sin(2\q)]^-1/4^'
_refine_diff_density_max               1.39
_refine_diff_density_min               -3.17
loop_
_atom_type_symbol
_atom_type_description
_atom_type_scat_dispersion_real
_atom_type_scat_dispersion_imag
_atom_type_scat_source
  'C' 'C'  0.003 0.002 
;International Tables for Crystallography
(1992, Vol. C, Tables 4.2.6.8 and 6.1.1.4)
;
  'H' 'H'  0.000 0.000 
;International Tables for Crystallography
(1992, Vol. C, Table 6.1.1.4)
;
  'O' 'O'  0.011 0.006 
;International Tables for Crystallography
(1992, Vol. C, Tables 4.2.6.8 and 6.1.1.4)
;
  'N' 'N'  0.006 0.003 
;International Tables for Crystallography
(1992, Vol. C, Tables 4.2.6.8 and 6.1.1.4)
;
  'B' 'B'  0.001 0.001 
;International Tables for Crystallography
(1992, Vol. C, Tables 4.2.6.8 and 6.1.1.4)
;
  'F' 'F'  0.017 0.010 
;International Tables for Crystallography
(1992, Vol. C, Tables 4.2.6.8 and 6.1.1.4)
;
  'P' 'P'  0.102 0.094 
;International Tables for Crystallography
(1992, Vol. C, Tables 4.2.6.8 and 6.1.1.4)
;
  'Cl' 'Cl'  0.148 0.159 
;International Tables for Crystallography
(1992, Vol. C, Tables 4.2.6.8 and 6.1.1.4)
;
  'Ir' 'Ir'  -1.444 7.990 
;International Tables for Crystallography
(1992, Vol. C, Tables 4.2.6.8 and 6.1.1.4)
;
#------------------------------------------------------------------------------
# ATOMIC COORDINATES AND DISPLACEMENT PARAMETERS 
loop_
_atom_site_label
_atom_site_type_symbol
_atom_site_fract_x
_atom_site_fract_y
_atom_site_fract_z
_atom_site_U_iso_or_equiv
_atom_site_adp_type
_atom_site_occupancy
_atom_site_calc_flag
_atom_site_refinement_flags
_atom_site_disorder_assembly
_atom_site_disorder_group
 Ir(1)  Ir 0.52165(3)  0.26946(2)  0.67036(2)  0.0383(1)   Uani 1.00 d . . .
 Ir(2)  Ir 0.97347(3)  0.69339(2)  0.85458(2)  0.0400(1)   Uani 1.00 d . . .
 Cl(1)  Cl 0.6281(2)   0.5745(2)   0.5099(2)   0.0661(7)   Uani 1.00 d . . .
 Cl(2)  Cl 0.7311(3)   0.4077(3)   0.5008(2)   0.0833(9)   Uani 1.00 d . . .
 Cl(3)  Cl 0.6742(3)   0.4840(3)   0.3777(2)   0.094(1)    Uani 1.00 d . . .
 Cl(4)  Cl 0.9106(4)   0.3227(4)   0.6246(3)   0.126(2)    Uani 1.00 d . . .
 Cl(5)  Cl 0.9690(5)   0.1442(4)   0.5610(3)   0.137(2)    Uani 1.00 d . . .
 Cl(6)  Cl 1.1335(4)   0.3124(5)   0.6629(4)   0.170(3)    Uani 1.00 d . . .
 Cl(7)  Cl 0.2778(4)   0.3333(4)   0.9686(3)   0.131(2)    Uani 1.00 d . . .
 Cl(8)  Cl 0.1652(6)   0.4883(5)   0.9608(3)   0.156(2)    Uani 1.00 d . . .
 Cl(9)  Cl 0.2926(5)   0.4461(7)   0.8709(4)   0.182(3)    Uani 1.00 d . . .
 Cl(10) Cl 0.5709(5)   0.6626(5)   0.8629(4)   0.164(3)    Uani 1.00 d . . .
 Cl(11) Cl 0.5371(9)   0.8552(5)   0.8760(6)   0.249(5)    Uani 1.00 d . . .
 Cl(12) Cl 0.3652(5)   0.6924(8)   0.8039(3)   0.232(5)    Uani 1.00 d . . .
 P(1)   P  0.5071(2)   0.1458(2)   0.7286(1)   0.0374(5)   Uani 1.00 d . . .
 P(2)   P  1.0036(2)   0.7969(2)   0.7844(1)   0.0376(5)   Uani 1.00 d . . .
 F(1)   F  0.3793(7)   0.1366(5)   0.2732(5)   0.100(3)    Uani 1.00 d . . .
 F(2)   F  0.4062(9)   0.3014(5)   0.3228(5)   0.121(4)    Uani 1.00 d . . .
 F(3)   F  0.5022(8)   0.2174(8)   0.3863(7)   0.145(5)    Uani 1.00 d . . .
 F(4)   F  0.3286(10)  0.203(1)    0.3671(7)   0.162(5)    Uani 1.00 d . . .
 F(5)   F  0.994(1)    0.825(1)    1.1278(7)   0.170(5)    Uani 1.00 d . . .
 F(6)   F  1.103(1)    0.9075(9)   1.2431(8)   0.184(6)    Uani 1.00 d . . .
 F(7)   F  1.135(1)    0.784(1)    1.188(1)    0.37(2)     Uani 1.00 d . . .
 F(8)   F  1.004(2)    0.765(2)    1.2091(9)   0.42(2)     Uani 1.00 d . . .
 O(01A) O  0.4311(7)   0.4214(6)   0.7572(5)   0.071(2)    Uani 1.00 d . . .
 O(01B) O  1.0641(7)   0.5289(6)   0.7796(5)   0.072(2)    Uani 1.00 d . . .
 O(02A) O  0.3150(7)   0.2171(6)   0.5332(5)   0.074(2)    Uani 1.00 d . . .
 O(02B) O  1.1473(7)   0.7323(8)   1.0063(5)   0.093(3)    Uani 1.00 d . . .
 N(1)   N  0.5865(6)   0.1624(5)   0.6085(5)   0.044(2)    Uani 1.00 d . . .
 N(2)   N  0.9088(6)   0.8160(5)   0.8999(4)   0.042(2)    Uani 1.00 d . . .
 C(1)   C  0.6583(7)   0.3808(6)   0.6752(5)   0.037(2)    Uani 1.00 d . . .
 C(01A) C  0.4659(8)   0.3632(8)   0.7240(6)   0.054(3)    Uani 1.00 d . . .
 C(01B) C  1.0291(8)   0.5913(8)   0.8090(6)   0.053(2)    Uani 1.00 d . . .
 C(2)   C  0.6920(7)   0.3445(6)   0.7380(5)   0.042(2)    Uani 1.00 d . . .
 C(02A) C  0.3911(9)   0.2382(7)   0.5838(7)   0.054(3)    Uani 1.00 d . . .
 C(02B) C  1.0880(8)   0.7190(8)   0.9490(7)   0.055(2)    Uani 1.00 d . . .
 C(3)   C  0.7227(7)   0.4099(7)   0.8179(5)   0.043(2)    Uani 1.00 d . . .
 C(4)   C  0.8366(8)   0.4798(7)   0.8442(5)   0.048(2)    Uani 1.00 d . . .
 C(5)   C  0.8304(7)   0.5875(6)   0.8502(5)   0.042(2)    Uani 1.00 d . . .
 C(6)   C  0.8025(6)   0.6217(6)   0.7866(5)   0.036(2)    Uani 1.00 d . . .
 C(7)   C  0.7714(8)   0.5553(6)   0.7074(5)   0.042(2)    Uani 1.00 d . . .
 C(8)   C  0.6543(7)   0.4872(6)   0.6810(5)   0.039(2)    Uani 1.00 d . . .
 C(11A) C  0.6202(7)   0.0903(6)   0.6345(5)   0.039(2)    Uani 1.00 d . . .
 C(11B) C  0.8822(7)   0.8796(6)   0.8619(5)   0.042(2)    Uani 1.00 d . . .
 C(12A) C  0.6649(9)   0.0219(8)   0.5940(7)   0.059(3)    Uani 1.00 d . . .
 C(12B) C  0.8498(8)   0.9639(8)   0.8931(6)   0.053(2)    Uani 1.00 d . . .
 C(13A) C  0.674(1)    0.0299(8)   0.5281(7)   0.069(3)    Uani 1.00 d . . .
 C(13B) C  0.841(1)    0.9807(8)   0.9638(7)   0.066(3)    Uani 1.00 d . . .
 C(14A) C  0.636(1)    0.1038(8)   0.5006(6)   0.062(3)    Uani 1.00 d . . .
 C(14B) C  0.8678(8)   0.9133(8)   1.0014(6)   0.053(2)    Uani 1.00 d . . .
 C(15A) C  0.5927(9)   0.1667(7)   0.5422(6)   0.052(2)    Uani 1.00 d . . .
 C(15B) C  0.8992(8)   0.8324(8)   0.9686(6)   0.050(2)    Uani 1.00 d . . .
 C(16A) C  0.6119(7)   0.0857(6)   0.7069(5)   0.040(2)    Uani 1.00 d . . .
 C(16B) C  0.8913(8)   0.8581(7)   0.7860(5)   0.046(2)    Uani 1.00 d . . .
 C(21A) C  0.5439(7)   0.1767(7)   0.8293(5)   0.041(2)    Uani 1.00 d . . .
 C(21B) C  0.9899(7)   0.7399(6)   0.6872(5)   0.040(2)    Uani 1.00 d . . .
 C(22A) C  0.5239(10)  0.2620(8)   0.8706(6)   0.061(3)    Uani 1.00 d . . .
 C(22B) C  1.0676(9)   0.6839(8)   0.6757(6)   0.053(2)    Uani 1.00 d . . .
 C(23A) C  0.547(1)    0.2833(9)   0.9469(6)   0.069(3)    Uani 1.00 d . . .
 C(23B) C  1.060(1)    0.6361(8)   0.6033(7)   0.065(3)    Uani 1.00 d . . .
 C(24A) C  0.5900(10)  0.218(1)    0.9805(6)   0.074(4)    Uani 1.00 d . . .
 C(24B) C  0.981(1)    0.6451(9)   0.5444(6)   0.065(3)    Uani 1.00 d . . .
 C(25A) C  0.6096(10)  0.133(1)    0.9403(7)   0.075(4)    Uani 1.00 d . . .
 C(25B) C  0.9078(9)   0.7008(10)  0.5563(6)   0.064(3)    Uani 1.00 d . . .
 C(26A) C  0.5881(9)   0.1132(9)   0.8655(6)   0.058(3)    Uani 1.00 d . . .
 C(26B) C  0.9122(8)   0.7472(8)   0.6278(5)   0.051(2)    Uani 1.00 d . . .
 C(31A) C  0.3818(8)   0.0494(7)   0.6917(5)   0.042(2)    Uani 1.00 d . . .
 C(31B) C  1.1248(7)   0.9000(7)   0.8213(5)   0.040(2)    Uani 1.00 d . . .
 C(32A) C  0.3810(8)   -0.0467(7)  0.6962(5)   0.048(2)    Uani 1.00 d . . .
 C(32B) C  1.1212(8)   0.9833(7)   0.7972(5)   0.047(2)    Uani 1.00 d . . .
 C(33A) C  0.2829(10)  -0.1182(8)  0.6678(6)   0.061(3)    Uani 1.00 d . . .
 C(33B) C  1.2135(9)   1.0616(8)   0.8246(6)   0.056(3)    Uani 1.00 d . . .
 C(34A) C  0.1869(10)  -0.0954(8)  0.6337(6)   0.063(3)    Uani 1.00 d . . .
 C(34B) C  1.3084(10)  1.0560(9)   0.8724(6)   0.063(3)    Uani 1.00 d . . .
 C(35A) C  0.1868(8)   -0.0003(9)  0.6312(6)   0.058(3)    Uani 1.00 d . . .
 C(35B) C  1.3111(9)   0.9740(9)   0.8966(6)   0.063(3)    Uani 1.00 d . . .
 C(36A) C  0.2845(8)   0.0718(8)   0.6590(6)   0.052(2)    Uani 1.00 d . . .
 C(36B) C  1.2203(7)   0.8954(8)   0.8707(6)   0.048(2)    Uani 1.00 d . . .
 C(41)  C  0.636(1)    0.4635(10)  0.4513(7)   0.068(3)    Uani 1.00 d . . .
 C(42)  C  1.000(1)    0.249(1)    0.6396(8)   0.090(4)    Uani 1.00 d . . .
 C(43)  C  0.209(1)    0.397(1)    0.9117(8)   0.086(4)    Uani 1.00 d . . .
 C(44)  C  0.501(1)    0.731(1)    0.8200(8)   0.089(5)    Uani 1.00 d . . .
 B(1)   B  0.410(1)    0.2178(10)  0.3400(7)   0.057(3)    Uani 1.00 d . . .
 B(2)   B  1.062(1)    0.821(1)    1.1911(9)   0.080(5)    Uani 1.00 d . . .
 H(1)   H  0.6884      0.3541      0.6378      0.0446      Uiso 1.00 calc . . .
 H(2)   H  0.7402      0.3005      0.7322      0.0512      Uiso 1.00 calc . . .
 H(3)   H  0.6702      0.4492      0.8223      0.0534      Uiso 1.00 calc . . .
 H(4)   H  0.7213      0.3684      0.8493      0.0534      Uiso 1.00 calc . . .
 H(5)   H  0.8795      0.4765      0.8906      0.0597      Uiso 1.00 calc . . .
 H(6)   H  0.8712      0.4563      0.8084      0.0597      Uiso 1.00 calc . . .
 H(7)   H  0.7986      0.6161      0.8864      0.0520      Uiso 1.00 calc . . .
 H(8)   H  0.7574      0.6683      0.7911      0.0435      Uiso 1.00 calc . . .
 H(9)   H  0.7749      0.5955      0.6761      0.0510      Uiso 1.00 calc . . .
 H(10)  H  0.8222      0.5137      0.7041      0.0510      Uiso 1.00 calc . . .
 H(11)  H  0.6113      0.4903      0.6342      0.0486      Uiso 1.00 calc . . .
 H(12)  H  0.6189      0.5110      0.7164      0.0486      Uiso 1.00 calc . . .
 H(13)  H  0.6875      -0.0309     0.6120      0.0744      Uiso 1.00 calc . . .
 H(14)  H  0.7071      -0.0140     0.4999      0.0822      Uiso 1.00 calc . . .
 H(15)  H  0.6407      0.1098      0.4547      0.0726      Uiso 1.00 calc . . .
 H(16)  H  0.5646      0.2172      0.5236      0.0639      Uiso 1.00 calc . . .
 H(17)  H  0.6803      0.1178      0.7456      0.0493      Uiso 1.00 calc . . .
 H(18)  H  0.5950      0.0169      0.7048      0.0493      Uiso 1.00 calc . . .
 H(19)  H  0.4912      0.3065      0.8455      0.0725      Uiso 1.00 calc . . .
 H(20)  H  0.5335      0.3435      0.9760      0.0821      Uiso 1.00 calc . . .
 H(21)  H  0.6065      0.2317      1.0331      0.0884      Uiso 1.00 calc . . .
 H(22)  H  0.6401      0.0880      0.9653      0.0910      Uiso 1.00 calc . . .
 H(23)  H  0.6051      0.0533      0.8375      0.0701      Uiso 1.00 calc . . .
 H(24)  H  0.4484      -0.0631     0.7180      0.0567      Uiso 1.00 calc . . .
 H(25)  H  0.2828      -0.1850     0.6735      0.0734      Uiso 1.00 calc . . .
 H(26)  H  0.1197      -0.1465     0.6117      0.0767      Uiso 1.00 calc . . .
 H(27)  H  0.1191      0.0163      0.6099      0.0728      Uiso 1.00 calc . . .
 H(28)  H  0.2854      0.1385      0.6560      0.0620      Uiso 1.00 calc . . .
 H(29)  H  0.8335      1.0106      0.8668      0.0641      Uiso 1.00 calc . . .
 H(30)  H  0.8180      1.0378      0.9864      0.0780      Uiso 1.00 calc . . .
 H(31)  H  0.8654      0.9254      1.0507      0.0645      Uiso 1.00 calc . . .
 H(32)  H  0.9147      0.7841      0.9944      0.0611      Uiso 1.00 calc . . .
 H(33)  H  0.9032      0.9182      0.7735      0.0556      Uiso 1.00 calc . . .
 H(34)  H  0.8244      0.8144      0.7489      0.0556      Uiso 1.00 calc . . .
 H(35)  H  1.1237      0.6789      0.7174      0.0652      Uiso 1.00 calc . . .
 H(36)  H  1.1119      0.5964      0.5943      0.0756      Uiso 1.00 calc . . .
 H(37)  H  0.9786      0.6115      0.4945      0.0789      Uiso 1.00 calc . . .
 H(38)  H  0.8529      0.7079      0.5142      0.0781      Uiso 1.00 calc . . .
 H(39)  H  0.8591      0.7843      0.6366      0.0621      Uiso 1.00 calc . . .
 H(40)  H  1.0553      0.9868      0.7618      0.0564      Uiso 1.00 calc . . .
 H(41)  H  1.2096      1.1215      0.8103      0.0670      Uiso 1.00 calc . . .
 H(42)  H  1.3738      1.1083      0.8885      0.0765      Uiso 1.00 calc . . .
 H(43)  H  1.3770      0.9726      0.9332      0.0770      Uiso 1.00 calc . . .
 H(44)  H  1.2236      0.8382      0.8881      0.0588      Uiso 1.00 calc . . .
 H(45)  H  0.5627      0.4184      0.4309      0.0835      Uiso 1.00 calc . . .
 H(46)  H  0.9934      0.2233      0.6799      0.1088      Uiso 1.00 calc . . .
 H(47)  H  0.1454      0.3485      0.8719      0.1037      Uiso 1.00 calc . . .
 H(48)  H  0.5123      0.7248      0.7731      0.1049      Uiso 1.00 calc . . .

loop_
_atom_site_aniso_label
_atom_site_aniso_U_11
_atom_site_aniso_U_22
_atom_site_aniso_U_33
_atom_site_aniso_U_12
_atom_site_aniso_U_13
_atom_site_aniso_U_23
 Ir(1)  0.0440(2)   0.0331(2)   0.0387(2)   0.0062(2)   0.0137(2)   0.0148(1)  
 Ir(2)  0.0409(2)   0.0380(2)   0.0397(2)   0.0061(2)   0.0143(2)   0.0111(2)  
 Cl(1)  0.067(2)    0.062(2)    0.071(2)    0.008(1)    0.025(1)    0.026(1)   
 Cl(2)  0.100(2)    0.095(2)    0.078(2)    0.040(2)    0.034(2)    0.051(2)   
 Cl(3)  0.120(3)    0.127(3)    0.062(2)    0.047(3)    0.042(2)    0.052(2)   
 Cl(4)  0.116(4)    0.154(4)    0.117(4)    0.075(3)    0.035(3)    0.041(3)   
 Cl(5)  0.162(5)    0.129(4)    0.105(3)    0.051(4)    0.034(3)    0.015(3)   
 Cl(6)  0.088(3)    0.182(6)    0.186(6)    0.028(4)    0.021(4)    -0.002(5)  
 Cl(7)  0.121(4)    0.148(4)    0.171(5)    0.060(3)    0.063(4)    0.097(4)   
 Cl(8)  0.224(6)    0.180(5)    0.114(4)    0.126(5)    0.085(4)    0.056(4)   
 Cl(9)  0.167(5)    0.319(9)    0.152(5)    0.092(6)    0.099(5)    0.155(6)   
 Cl(10) 0.192(6)    0.186(6)    0.151(5)    0.134(5)    0.058(5)    0.068(4)   
 Cl(11) 0.41(1)     0.100(4)    0.33(1)     0.040(6)    0.29(1)     0.055(5)   
 Cl(12) 0.105(4)    0.44(1)     0.087(4)    0.118(6)    0.011(3)    -0.027(5)  
 P(1)   0.043(1)    0.034(1)    0.039(1)    0.0075(9)   0.016(1)    0.0167(9)  
 P(2)   0.039(1)    0.036(1)    0.038(1)    0.0058(9)   0.0149(10)  0.0119(9)  
 F(1)   0.120(7)    0.065(4)    0.093(6)    0.037(5)    0.013(5)    0.010(4)   
 F(2)   0.20(1)     0.054(4)    0.109(7)    0.041(6)    0.036(7)    0.044(4)   
 F(3)   0.101(7)    0.142(9)    0.149(10)   0.061(7)    -0.022(7)   0.032(7)   
 F(4)   0.145(10)   0.21(1)     0.17(1)     0.038(9)    0.107(9)    0.068(10)  
 F(5)   0.16(1)     0.23(1)     0.128(9)    0.07(1)     0.006(8)    0.106(10)  
 F(6)   0.17(1)     0.108(8)    0.19(1)     0.030(8)    -0.036(10)  -0.001(8)  
 F(7)   0.18(2)     0.22(2)     0.42(3)     0.13(1)     -0.16(2)    -0.11(2)   
 F(8)   0.40(3)     0.52(4)     0.16(1)     -0.31(3)    -0.06(2)    0.20(2)    
 O(01A) 0.073(5)    0.069(5)    0.093(6)    0.035(4)    0.046(5)    0.034(5)   
 O(01B) 0.089(6)    0.058(4)    0.082(6)    0.036(4)    0.043(5)    0.018(4)   
 O(02A) 0.061(5)    0.072(5)    0.061(5)    0.000(4)    -0.017(4)   0.025(4)   
 O(02B) 0.063(5)    0.132(9)    0.057(5)    0.020(6)    -0.009(5)   0.021(5)   
 N(1)   0.043(4)    0.037(4)    0.053(5)    0.002(3)    0.018(4)    0.017(3)   
 N(2)   0.052(5)    0.040(4)    0.035(4)    0.011(3)    0.019(4)    0.011(3)   
 C(1)   0.038(4)    0.033(4)    0.040(4)    0.005(3)    0.018(4)    0.010(4)   
 C(01A) 0.052(6)    0.047(5)    0.068(7)    0.012(5)    0.013(5)    0.031(5)   
 C(01B) 0.042(5)    0.063(6)    0.051(6)    0.002(5)    0.018(5)    0.018(5)   
 C(2)   0.047(5)    0.039(4)    0.042(5)    0.008(4)    0.015(4)    0.017(4)   
 C(02A) 0.068(7)    0.037(5)    0.070(7)    0.015(5)    0.034(6)    0.023(5)   
 C(02B) 0.044(6)    0.054(6)    0.064(7)    0.008(5)    0.023(5)    0.014(5)   
 C(3)   0.047(5)    0.049(5)    0.033(4)    0.003(4)    0.013(4)    0.016(4)   
 C(4)   0.053(6)    0.044(5)    0.045(5)    0.001(4)    0.010(4)    0.023(4)   
 C(5)   0.033(4)    0.040(4)    0.049(5)    -0.004(4)   0.015(4)    0.012(4)   
 C(6)   0.021(4)    0.040(4)    0.035(4)    -0.004(3)   0.005(3)    0.005(4)   
 C(7)   0.051(5)    0.036(4)    0.039(5)    0.003(4)    0.016(4)    0.017(4)   
 C(8)   0.046(5)    0.030(4)    0.039(4)    0.001(4)    0.010(4)    0.015(3)   
 C(11A) 0.049(5)    0.029(4)    0.043(5)    0.012(4)    0.020(4)    0.010(4)   
 C(11B) 0.034(4)    0.034(4)    0.050(5)    0.006(4)    0.011(4)    0.005(4)   
 C(12A) 0.066(7)    0.042(5)    0.071(7)    0.006(5)    0.033(6)    0.014(5)   
 C(12B) 0.049(6)    0.053(5)    0.058(6)    0.019(5)    0.023(5)    0.012(5)   
 C(13A) 0.084(8)    0.050(6)    0.074(8)    0.009(6)    0.047(7)    0.003(6)   
 C(13B) 0.085(8)    0.054(6)    0.060(7)    0.024(6)    0.030(7)    0.009(5)   
 C(14A) 0.088(8)    0.045(5)    0.046(6)    0.001(5)    0.033(6)    -0.002(5)  
 C(14B) 0.056(6)    0.058(6)    0.042(5)    0.009(5)    0.022(5)    0.004(4)   
 C(15A) 0.067(7)    0.044(5)    0.044(5)    0.007(5)    0.020(5)    0.012(4)   
 C(15B) 0.050(6)    0.057(6)    0.045(5)    0.010(5)    0.025(5)    0.014(5)   
 C(16A) 0.036(4)    0.038(4)    0.048(5)    0.009(4)    0.015(4)    0.015(4)   
 C(16B) 0.056(6)    0.040(4)    0.049(5)    0.017(4)    0.019(5)    0.021(4)   
 C(21A) 0.040(5)    0.047(5)    0.039(5)    0.005(4)    0.015(4)    0.018(4)   
 C(21B) 0.039(5)    0.040(4)    0.039(5)    0.000(4)    0.017(4)    0.009(4)   
 C(22A) 0.084(8)    0.054(6)    0.047(6)    0.011(6)    0.029(6)    0.016(5)   
 C(22B) 0.065(7)    0.058(6)    0.045(5)    0.021(5)    0.025(5)    0.018(5)   
 C(23A) 0.088(9)    0.074(7)    0.039(6)    0.008(7)    0.031(6)    0.006(5)   
 C(23B) 0.079(8)    0.057(6)    0.071(8)    0.024(6)    0.047(7)    0.013(6)   
 C(24A) 0.061(7)    0.11(1)     0.033(5)    0.000(7)    0.004(5)    0.022(6)   
 C(24B) 0.083(8)    0.065(7)    0.044(6)    0.007(6)    0.027(6)    0.009(5)   
 C(25A) 0.063(7)    0.12(1)     0.050(7)    0.018(7)    0.013(6)    0.047(7)   
 C(25B) 0.047(6)    0.090(8)    0.049(6)    0.005(6)    0.021(5)    0.013(6)   
 C(26A) 0.056(6)    0.072(7)    0.047(6)    0.020(5)    0.012(5)    0.025(5)   
 C(26B) 0.053(6)    0.061(6)    0.043(5)    0.016(5)    0.021(5)    0.015(5)   
 C(31A) 0.047(5)    0.043(5)    0.039(5)    0.010(4)    0.016(4)    0.016(4)   
 C(31B) 0.037(5)    0.044(5)    0.042(5)    0.009(4)    0.020(4)    0.011(4)   
 C(32A) 0.058(6)    0.036(4)    0.045(5)    0.000(4)    0.016(5)    0.014(4)   
 C(32B) 0.050(5)    0.048(5)    0.036(5)    0.003(4)    0.010(4)    0.013(4)   
 C(33A) 0.075(8)    0.044(5)    0.060(7)    0.000(5)    0.027(6)    0.015(5)   
 C(33B) 0.061(7)    0.048(5)    0.052(6)    -0.003(5)   0.018(5)    0.015(5)   
 C(34A) 0.066(7)    0.052(6)    0.061(7)    -0.010(5)   0.017(6)    0.019(5)   
 C(34B) 0.066(7)    0.061(6)    0.055(6)    -0.006(6)   0.027(6)    0.012(5)   
 C(35A) 0.037(5)    0.075(7)    0.058(6)    0.003(5)    0.011(5)    0.025(6)   
 C(35B) 0.047(6)    0.080(8)    0.054(6)    -0.002(5)   0.013(5)    0.021(6)   
 C(36A) 0.051(6)    0.051(5)    0.059(6)    0.006(5)    0.020(5)    0.029(5)   
 C(36B) 0.036(5)    0.058(6)    0.053(6)    0.005(4)    0.015(4)    0.024(5)   
 C(41)  0.072(8)    0.082(8)    0.057(7)    0.015(7)    0.025(6)    0.031(6)   
 C(42)  0.076(9)    0.12(1)     0.074(9)    0.037(9)    0.013(8)    0.032(8)   
 C(43)  0.081(9)    0.11(1)     0.077(9)    0.024(8)    0.032(8)    0.034(8)   
 C(44)  0.14(1)     0.10(1)     0.077(9)    0.06(1)     0.070(10)   0.045(8)   
 B(1)   0.052(7)    0.058(7)    0.055(7)    0.013(6)    0.004(6)    0.023(6)   
 B(2)   0.067(9)    0.10(1)     0.071(10)   0.008(9)    -0.005(8)   0.057(10)  
#------------------------------------------------------------------------------
_computing_data_collection            'PROCESS-AUTO'
_computing_cell_refinement            'PROCESS-AUTO'
_computing_data_reduction             'teXsan Ver. 1.11'
_computing_structure_solution          SAPI91
_computing_structure_refinement       'SHELXL97'
_computing_publication_material       'teXsan Ver. 1.11'
_computing_molecular_graphics          ?
#------------------------------------------------------------------------------
_geom_special_details
;
 ?
;
loop_
_geom_bond_atom_site_label_1
_geom_bond_atom_site_label_2
_geom_bond_distance
_geom_bond_site_symmetry_1
_geom_bond_site_symmetry_2
_geom_bond_publ_flag
 Ir(1)     P(1)      2.363(3)   . . yes
 Ir(1)     N(1)      2.135(9)   . . yes
 Ir(1)     C(1)      2.193(9)   . . yes
 Ir(1)     C(01A)    1.85(1)    . . yes
 Ir(1)     C(2)      2.206(8)   . . yes
 Ir(1)     C(02A)    1.96(1)    . . yes
 Ir(2)     P(2)      2.348(3)   . . yes
 Ir(2)     N(2)      2.151(8)   . . yes
 Ir(2)     C(01B)    1.86(1)    . . yes
 Ir(2)     C(02B)    1.95(1)    . . yes
 Ir(2)     C(5)      2.214(9)   . . yes
 Ir(2)     C(6)      2.206(7)   . . yes
 Cl(1)     C(41)     1.73(1)    . . yes
 Cl(2)     C(41)     1.78(1)    . . yes
 Cl(3)     C(41)     1.76(2)    . . yes
 Cl(4)     C(42)     1.71(2)    . . yes
 Cl(5)     C(42)     1.75(2)    . . yes
 Cl(6)     C(42)     1.73(2)    . . yes
 Cl(7)     C(43)     1.77(2)    . . yes
 Cl(8)     C(43)     1.68(2)    . . yes
 Cl(9)     C(43)     1.73(2)    . . yes
 Cl(10)    C(44)     1.66(2)    . . yes
 Cl(11)    C(44)     1.74(2)    . . yes
 Cl(12)    C(44)     1.71(2)    . . yes
 P(1)      C(16A)    1.82(1)    . . yes
 P(1)      C(21A)    1.830(10)  . . yes
 P(1)      C(31A)    1.819(9)   . . yes
 P(2)      C(16B)    1.83(1)    . . yes
 P(2)      C(21B)    1.831(9)   . . yes
 P(2)      C(31B)    1.834(8)   . . yes
 F(1)      B(1)      1.42(1)    . . yes
 F(2)      B(1)      1.33(2)    . . yes
 F(3)      B(1)      1.31(2)    . . yes
 F(4)      B(1)      1.34(2)    . . yes
 F(5)      B(2)      1.34(2)    . . yes
 F(6)      B(2)      1.31(2)    . . yes
 F(7)      B(2)      1.18(3)    . . yes
 F(8)      B(2)      1.22(3)    . . yes
 O(01A)    C(01A)    1.15(2)    . . yes
 O(01B)    C(01B)    1.16(1)    . . yes
 O(02A)    C(02A)    1.14(1)    . . yes
 O(02B)    C(02B)    1.13(1)    . . yes
 N(1)      C(11A)    1.34(1)    . . yes
 N(1)      C(15A)    1.36(2)    . . yes
 N(2)      C(11B)    1.35(1)    . . yes
 N(2)      C(15B)    1.37(1)    . . yes
 C(1)      C(2)      1.45(1)    . . yes
 C(1)      C(8)      1.50(1)    . . yes
 C(2)      C(3)      1.52(1)    . . yes
 C(3)      C(4)      1.55(1)    . . yes
 C(4)      C(5)      1.52(1)    . . yes
 C(5)      C(6)      1.44(1)    . . yes
 C(6)      C(7)      1.51(1)    . . yes
 C(7)      C(8)      1.57(1)    . . yes
 C(11A)    C(12A)    1.40(2)    . . yes
 C(11A)    C(16A)    1.49(2)    . . yes
 C(11B)    C(12B)    1.38(1)    . . yes
 C(11B)    C(16B)    1.50(2)    . . yes
 C(12A)    C(13A)    1.38(2)    . . yes
 C(12B)    C(13B)    1.40(2)    . . yes
 C(13A)    C(14A)    1.40(2)    . . yes
 C(13B)    C(14B)    1.39(2)    . . yes
 C(14A)    C(15A)    1.35(2)    . . yes
 C(14B)    C(15B)    1.35(2)    . . yes
 C(21A)    C(22A)    1.38(1)    . . yes
 C(21A)    C(26A)    1.39(2)    . . yes
 C(21B)    C(22B)    1.42(2)    . . yes
 C(21B)    C(26B)    1.36(1)    . . yes
 C(22A)    C(23A)    1.40(2)    . . yes
 C(22B)    C(23B)    1.39(2)    . . yes
 C(23A)    C(24A)    1.37(2)    . . yes
 C(23B)    C(24B)    1.38(2)    . . yes
 C(24A)    C(25A)    1.37(2)    . . yes
 C(24B)    C(25B)    1.37(2)    . . yes
 C(25A)    C(26A)    1.37(2)    . . yes
 C(25B)    C(26B)    1.38(2)    . . yes
 C(31A)    C(32A)    1.39(1)    . . yes
 C(31A)    C(36A)    1.39(1)    . . yes
 C(31B)    C(32B)    1.39(2)    . . yes
 C(31B)    C(36B)    1.38(1)    . . yes
 C(32A)    C(33A)    1.40(1)    . . yes
 C(32B)    C(33B)    1.40(1)    . . yes
 C(33A)    C(34A)    1.39(2)    . . yes
 C(33B)    C(34B)    1.37(2)    . . yes
 C(34A)    C(35A)    1.37(2)    . . yes
 C(34B)    C(35B)    1.38(2)    . . yes
 C(35A)    C(36A)    1.40(1)    . . yes
 C(35B)    C(36B)    1.39(1)    . . yes
#------------------------------------------------------------------------------
loop_
_geom_angle_atom_site_label_1
_geom_angle_atom_site_label_2
_geom_angle_atom_site_label_3
_geom_angle
_geom_angle_site_symmetry_1
_geom_angle_site_symmetry_2
_geom_angle_site_symmetry_3
_geom_angle_publ_flag
   P(1)      Ir(1)     N(1)      80.7(3)    . . . yes
   P(1)      Ir(1)     C(1)      133.5(2)   . . . yes
   P(1)      Ir(1)     C(01A)    99.6(4)    . . . yes
   P(1)      Ir(1)     C(2)      96.0(3)    . . . yes
   P(1)      Ir(1)     C(02A)    108.9(4)   . . . yes
   N(1)      Ir(1)     C(1)      85.4(3)    . . . yes
   N(1)      Ir(1)     C(01A)    179.6(4)   . . . yes
   N(1)      Ir(1)     C(2)      85.6(3)    . . . yes
   N(1)      Ir(1)     C(02A)    90.4(4)    . . . yes
   C(1)      Ir(1)     C(01A)    94.2(4)    . . . yes
   C(1)      Ir(1)     C(2)      38.6(4)    . . . yes
   C(1)      Ir(1)     C(02A)    115.3(4)   . . . yes
   C(01A)    Ir(1)     C(2)      94.1(4)    . . . yes
   C(01A)    Ir(1)     C(02A)    89.7(5)    . . . yes
   C(2)      Ir(1)     C(02A)    153.8(5)   . . . yes
   P(2)      Ir(2)     N(2)      79.6(2)    . . . yes
   P(2)      Ir(2)     C(01B)    95.9(4)    . . . yes
   P(2)      Ir(2)     C(02B)    116.1(4)   . . . yes
   P(2)      Ir(2)     C(5)      134.5(3)   . . . yes
   P(2)      Ir(2)     C(6)      96.6(3)    . . . yes
   N(2)      Ir(2)     C(01B)    175.3(5)   . . . yes
   N(2)      Ir(2)     C(02B)    92.5(4)    . . . yes
   N(2)      Ir(2)     C(5)      89.3(3)    . . . yes
   N(2)      Ir(2)     C(6)      84.1(3)    . . . yes
   C(01B)    Ir(2)     C(02B)    90.6(5)    . . . yes
   C(01B)    Ir(2)     C(5)      93.0(4)    . . . yes
   C(01B)    Ir(2)     C(6)      95.3(3)    . . . yes
   C(02B)    Ir(2)     C(5)      108.3(5)   . . . yes
   C(02B)    Ir(2)     C(6)      146.0(5)   . . . yes
   C(5)      Ir(2)     C(6)      38.1(4)    . . . yes
   Ir(1)     P(1)      C(16A)    98.6(4)    . . . yes
   Ir(1)     P(1)      C(21A)    122.4(3)   . . . yes
   Ir(1)     P(1)      C(31A)    118.1(3)   . . . yes
   C(16A)    P(1)      C(21A)    104.3(4)   . . . yes
   C(16A)    P(1)      C(31A)    107.1(4)   . . . yes
   C(21A)    P(1)      C(31A)    104.3(5)   . . . yes
   Ir(2)     P(2)      C(16B)    98.3(4)    . . . yes
   Ir(2)     P(2)      C(21B)    119.3(3)   . . . yes
   Ir(2)     P(2)      C(31B)    120.3(3)   . . . yes
   C(16B)    P(2)      C(21B)    107.7(4)   . . . yes
   C(16B)    P(2)      C(31B)    104.8(4)   . . . yes
   C(21B)    P(2)      C(31B)    104.7(4)   . . . yes
   Ir(1)     N(1)      C(11A)    120.2(7)   . . . yes
   Ir(1)     N(1)      C(15A)    119.9(7)   . . . yes
   C(11A)    N(1)      C(15A)    119.9(9)   . . . yes
   Ir(2)     N(2)      C(11B)    119.9(7)   . . . yes
   Ir(2)     N(2)      C(15B)    120.3(7)   . . . yes
   C(11B)    N(2)      C(15B)    119.7(9)   . . . yes
   Ir(1)     C(1)      C(2)      71.2(5)    . . . yes
   Ir(1)     C(1)      C(8)      123.2(7)   . . . yes
   C(2)      C(1)      C(8)      124.8(7)   . . . yes
   Ir(1)     C(01A)    O(01A)    179(1)     . . . yes
   Ir(2)     C(01B)    O(01B)    178(1)     . . . yes
   Ir(1)     C(2)      C(1)      70.2(4)    . . . yes
   Ir(1)     C(2)      C(3)      121.2(7)   . . . yes
   C(1)      C(2)      C(3)      123.4(8)   . . . yes
   Ir(1)     C(02A)    O(02A)    178.0(9)   . . . yes
   Ir(2)     C(02B)    O(02B)    173(1)     . . . yes
   C(2)      C(3)      C(4)      110.6(9)   . . . yes
   C(3)      C(4)      C(5)      111.7(8)   . . . yes
   Ir(2)     C(5)      C(4)      118.9(7)   . . . yes
   Ir(2)     C(5)      C(6)      70.7(5)    . . . yes
   C(4)      C(5)      C(6)      122.8(8)   . . . yes
   Ir(2)     C(6)      C(5)      71.3(4)    . . . yes
   Ir(2)     C(6)      C(7)      121.2(6)   . . . yes
   C(5)      C(6)      C(7)      124.5(8)   . . . yes
   C(6)      C(7)      C(8)      110.4(8)   . . . yes
   C(1)      C(8)      C(7)      111.0(8)   . . . yes
   N(1)      C(11A)    C(12A)    119(1)     . . . yes
   N(1)      C(11A)    C(16A)    119.4(9)   . . . yes
   C(12A)    C(11A)    C(16A)    121.2(9)   . . . yes
   N(2)      C(11B)    C(12B)    120(1)     . . . yes
   N(2)      C(11B)    C(16B)    118.3(8)   . . . yes
   C(12B)    C(11B)    C(16B)    121.1(10)  . . . yes
   C(11A)    C(12A)    C(13A)    119(1)     . . . yes
   C(11B)    C(12B)    C(13B)    119(1)     . . . yes
   C(12A)    C(13A)    C(14A)    120(1)     . . . yes
   C(12B)    C(13B)    C(14B)    119(1)     . . . yes
   C(13A)    C(14A)    C(15A)    117(1)     . . . yes
   C(13B)    C(14B)    C(15B)    119(1)     . . . yes
   N(1)      C(15A)    C(14A)    123(1)     . . . yes
   N(2)      C(15B)    C(14B)    121(1)     . . . yes
   P(1)      C(16A)    C(11A)    111.3(7)   . . . yes
   P(2)      C(16B)    C(11B)    108.4(7)   . . . yes
   P(1)      C(21A)    C(22A)    120.5(8)   . . . yes
   P(1)      C(21A)    C(26A)    121.0(7)   . . . yes
   C(22A)    C(21A)    C(26A)    118.4(10)  . . . yes
   P(2)      C(21B)    C(22B)    115.0(7)   . . . yes
   P(2)      C(21B)    C(26B)    125.1(8)   . . . yes
   C(22B)    C(21B)    C(26B)    119.9(9)   . . . yes
   C(21A)    C(22A)    C(23A)    120(1)     . . . yes
   C(21B)    C(22B)    C(23B)    118.3(10)  . . . yes
   C(22A)    C(23A)    C(24A)    119(1)     . . . yes
   C(22B)    C(23B)    C(24B)    120(1)     . . . yes
   C(23A)    C(24A)    C(25A)    121(1)     . . . yes
   C(23B)    C(24B)    C(25B)    120(1)     . . . yes
   C(24A)    C(25A)    C(26A)    119(1)     . . . yes
   C(24B)    C(25B)    C(26B)    119(1)     . . . yes
   C(21A)    C(26A)    C(25A)    121(1)     . . . yes
   C(21B)    C(26B)    C(25B)    120(1)     . . . yes
   P(1)      C(31A)    C(32A)    121.3(7)   . . . yes
   P(1)      C(31A)    C(36A)    119.6(8)   . . . yes
   C(32A)    C(31A)    C(36A)    119.0(8)   . . . yes
   P(2)      C(31B)    C(32B)    119.1(6)   . . . yes
   P(2)      C(31B)    C(36B)    121.5(8)   . . . yes
   C(32B)    C(31B)    C(36B)    119.4(8)   . . . yes
   C(31A)    C(32A)    C(33A)    119.5(10)  . . . yes
   C(31B)    C(32B)    C(33B)    119.3(9)   . . . yes
   C(32A)    C(33A)    C(34A)    120(1)     . . . yes
   C(32B)    C(33B)    C(34B)    121(1)     . . . yes
   C(33A)    C(34A)    C(35A)    119.9(9)   . . . yes
   C(33B)    C(34B)    C(35B)    119(1)     . . . yes
   C(34A)    C(35A)    C(36A)    119(1)     . . . yes
   C(34B)    C(35B)    C(36B)    120(1)     . . . yes
   C(31A)    C(36A)    C(35A)    120(1)     . . . yes
   C(31B)    C(36B)    C(35B)    119(1)     . . . yes
   Cl(1)     C(41)     Cl(2)     110.7(6)   . . . yes
   Cl(1)     C(41)     Cl(3)     111.0(8)   . . . yes
   Cl(2)     C(41)     Cl(3)     109.0(8)   . . . yes
   Cl(4)     C(42)     Cl(5)     110.5(8)   . . . yes
   Cl(4)     C(42)     Cl(6)     112(1)     . . . yes
   Cl(5)     C(42)     Cl(6)     109.1(10)  . . . yes
   Cl(7)     C(43)     Cl(8)     111.1(9)   . . . yes
   Cl(7)     C(43)     Cl(9)     109.8(9)   . . . yes
   Cl(8)     C(43)     Cl(9)     110.2(10)  . . . yes
   Cl(10)    C(44)     Cl(11)    110.6(8)   . . . yes
   Cl(10)    C(44)     Cl(12)    111(1)     . . . yes
   Cl(11)    C(44)     Cl(12)    105(1)     . . . yes
   F(1)      B(1)      F(2)      108(1)     . . . yes
   F(1)      B(1)      F(3)      110(1)     . . . yes
   F(1)      B(1)      F(4)      104(1)     . . . yes
   F(2)      B(1)      F(3)      115(1)     . . . yes
   F(2)      B(1)      F(4)      105(1)     . . . yes
   F(3)      B(1)      F(4)      111(1)     . . . yes
   F(5)      B(2)      F(6)      114(1)     . . . yes
   F(5)      B(2)      F(7)      117(2)     . . . yes
   F(5)      B(2)      F(8)      102(1)     . . . yes
   F(6)      B(2)      F(7)      105(1)     . . . yes
   F(6)      B(2)      F(8)      111(1)     . . . yes
   F(7)      B(2)      F(8)      105(2)     . . . yes
#------------------------------------------------------------------------------
loop_
_geom_torsion_atom_site_label_1
_geom_torsion_atom_site_label_2
_geom_torsion_atom_site_label_3
_geom_torsion_atom_site_label_4
_geom_torsion
_geom_torsion_site_symmetry_1
_geom_torsion_site_symmetry_2
_geom_torsion_site_symmetry_3
_geom_torsion_site_symmetry_4
_geom_torsion_publ_flag
 Ir(1)     P(1)      C(16A)    C(11A)    -31.7(5)   . . . . yes
 Ir(1)     P(1)      C(21A)    C(22A)    36.1(10)   . . . . yes
 Ir(1)     P(1)      C(21A)    C(26A)    -146.6(7)  . . . . yes
 Ir(1)     P(1)      C(31A)    C(32A)    149.4(8)   . . . . yes
 Ir(1)     P(1)      C(31A)    C(36A)    -31(1)     . . . . yes
 Ir(1)     N(1)      C(11A)    C(12A)    -178.6(6)  . . . . yes
 Ir(1)     N(1)      C(11A)    C(16A)    0.0(10)    . . . . yes
 Ir(1)     N(1)      C(15A)    C(14A)    177.9(8)   . . . . yes
 Ir(1)     C(1)      C(2)      C(3)      -115.0(9)  . . . . yes
 Ir(1)     C(1)      C(8)      C(7)      162.8(6)   . . . . yes
 Ir(1)     C(2)      C(1)      C(8)      117.9(9)   . . . . yes
 Ir(1)     C(2)      C(3)      C(4)      -161.2(7)  . . . . yes
 Ir(2)     P(2)      C(16B)    C(11B)    39.8(6)    . . . . yes
 Ir(2)     P(2)      C(21B)    C(22B)    -65.9(8)   . . . . yes
 Ir(2)     P(2)      C(21B)    C(26B)    113.6(9)   . . . . yes
 Ir(2)     P(2)      C(31B)    C(32B)    -152.9(7)  . . . . yes
 Ir(2)     P(2)      C(31B)    C(36B)    29(1)      . . . . yes
 Ir(2)     N(2)      C(11B)    C(12B)    -174.1(6)  . . . . yes
 Ir(2)     N(2)      C(11B)    C(16B)    4.3(10)    . . . . yes
 Ir(2)     N(2)      C(15B)    C(14B)    174.2(7)   . . . . yes
 Ir(2)     C(5)      C(4)      C(3)      -162.5(6)  . . . . yes
 Ir(2)     C(5)      C(6)      C(7)      115.5(9)   . . . . yes
 Ir(2)     C(6)      C(5)      C(4)      -112.6(9)  . . . . yes
 Ir(2)     C(6)      C(7)      C(8)      161.2(6)   . . . . yes
 P(1)      Ir(1)     N(1)      C(11A)    -17.3(6)   . . . . yes
 P(1)      Ir(1)     N(1)      C(15A)    162.1(7)   . . . . yes
 P(1)      Ir(1)     C(1)      C(2)      -16.2(7)   . . . . yes
 P(1)      Ir(1)     C(1)      C(8)      -136.1(6)  . . . . yes
 P(1)      Ir(1)     C(01A)    O(01A)    -135.2     . . . . yes
 P(1)      Ir(1)     C(2)      C(1)      168.3(5)   . . . . yes
 P(1)      Ir(1)     C(2)      C(3)      -74.0(8)   . . . . yes
 P(1)      Ir(1)     C(02A)    O(02A)    -31(35)    . . . . yes
 P(1)      C(16A)    C(11A)    N(1)      24.1(9)    . . . . yes
 P(1)      C(16A)    C(11A)    C(12A)    -157.4(7)  . . . . yes
 P(1)      C(21A)    C(22A)    C(23A)    177.0(9)   . . . . yes
 P(1)      C(21A)    C(26A)    C(25A)    -176.0(9)  . . . . yes
 P(1)      C(31A)    C(32A)    C(33A)    179.4(9)   . . . . yes
 P(1)      C(31A)    C(36A)    C(35A)    -179.0(9)  . . . . yes
 P(2)      Ir(2)     N(2)      C(11B)    18.5(6)    . . . . yes
 P(2)      Ir(2)     N(2)      C(15B)    -158.6(7)  . . . . yes
 P(2)      Ir(2)     C(01B)    O(01B)    -4(28)     . . . . yes
 P(2)      Ir(2)     C(02B)    O(02B)    140(9)     . . . . yes
 P(2)      Ir(2)     C(5)      C(4)      124.1(6)   . . . . yes
 P(2)      Ir(2)     C(5)      C(6)      6.6(7)     . . . . yes
 P(2)      Ir(2)     C(6)      C(5)      -175.3(5)  . . . . yes
 P(2)      Ir(2)     C(6)      C(7)      65.1(7)    . . . . yes
 P(2)      C(16B)    C(11B)    N(2)      -32.2(9)   . . . . yes
 P(2)      C(16B)    C(11B)    C(12B)    146.2(7)   . . . . yes
 P(2)      C(21B)    C(22B)    C(23B)    178.2(9)   . . . . yes
 P(2)      C(21B)    C(26B)    C(25B)    -179.4(9)  . . . . yes
 P(2)      C(31B)    C(32B)    C(33B)    -179.5(9)  . . . . yes
 P(2)      C(31B)    C(36B)    C(35B)    178.8(9)   . . . . yes
 O(01A)    C(01A)    Ir(1)     N(1)      77.9       . . . . yes
 O(01A)    C(01A)    Ir(1)     C(1)      89.4       . . . . yes
 O(01A)    C(01A)    Ir(1)     C(2)      128.0      . . . . yes
 O(01A)    C(01A)    Ir(1)     C(02A)    -26.0      . . . . yes
 O(01B)    C(01B)    Ir(2)     N(2)      10(31)     . . . . yes
 O(01B)    C(01B)    Ir(2)     C(02B)    -120(28)   . . . . yes
 O(01B)    C(01B)    Ir(2)     C(5)      131(28)    . . . . yes
 O(01B)    C(01B)    Ir(2)     C(6)      92(28)     . . . . yes
 O(02A)    C(02A)    Ir(1)     N(1)      48(35)     . . . . yes
 O(02A)    C(02A)    Ir(1)     C(1)      133(35)    . . . . yes
 O(02A)    C(02A)    Ir(1)     C(01A)    -131(35)   . . . . yes
 O(02A)    C(02A)    Ir(1)     C(2)      129(34)    . . . . yes
 O(02B)    C(02B)    Ir(2)     N(2)      60(9)      . . . . yes
 O(02B)    C(02B)    Ir(2)     C(01B)    -123(9)    . . . . yes
 O(02B)    C(02B)    Ir(2)     C(5)      -29(9)     . . . . yes
 O(02B)    C(02B)    Ir(2)     C(6)      -22(10)    . . . . yes
 N(1)      Ir(1)     P(1)      C(16A)    23.8(3)    . . . . yes
 N(1)      Ir(1)     P(1)      C(21A)    136.8(4)   . . . . yes
 N(1)      Ir(1)     P(1)      C(31A)    -91.0(4)   . . . . yes
 N(1)      Ir(1)     C(1)      C(2)      -88.8(6)   . . . . yes
 N(1)      Ir(1)     C(1)      C(8)      151.4(7)   . . . . yes
 N(1)      Ir(1)     C(2)      C(1)      88.1(6)    . . . . yes
 N(1)      Ir(1)     C(2)      C(3)      -154.1(8)  . . . . yes
 N(1)      C(11A)    C(12A)    C(13A)    0(1)       . . . . yes
 N(1)      C(15A)    C(14A)    C(13A)    0(1)       . . . . yes
 N(2)      Ir(2)     P(2)      C(16B)    -28.7(3)   . . . . yes
 N(2)      Ir(2)     P(2)      C(21B)    -144.4(4)  . . . . yes
 N(2)      Ir(2)     P(2)      C(31B)    83.9(4)    . . . . yes
 N(2)      Ir(2)     C(5)      C(4)      -161.2(7)  . . . . yes
 N(2)      Ir(2)     C(5)      C(6)      81.3(5)    . . . . yes
 N(2)      Ir(2)     C(6)      C(5)      -96.5(5)   . . . . yes
 N(2)      Ir(2)     C(6)      C(7)      143.9(8)   . . . . yes
 N(2)      C(11B)    C(12B)    C(13B)    -2(1)      . . . . yes
 N(2)      C(15B)    C(14B)    C(13B)    1(1)       . . . . yes
 C(1)      Ir(1)     P(1)      C(16A)    -50.7(4)   . . . . yes
 C(1)      Ir(1)     P(1)      C(21A)    62.3(5)    . . . . yes
 C(1)      Ir(1)     P(1)      C(31A)    -165.5(5)  . . . . yes
 C(1)      Ir(1)     N(1)      C(11A)    118.2(6)   . . . . yes
 C(1)      Ir(1)     N(1)      C(15A)    -62.4(7)   . . . . yes
 C(1)      Ir(1)     C(2)      C(3)      117.8(10)  . . . . yes
 C(1)      C(2)      Ir(1)     C(01A)    -91.6(6)   . . . . yes
 C(1)      C(2)      Ir(1)     C(02A)    6(1)       . . . . yes
 C(1)      C(2)      C(3)      C(4)      -75(1)     . . . . yes
 C(1)      C(8)      C(7)      C(6)      -107.1(9)  . . . . yes
 C(01A)    Ir(1)     P(1)      C(16A)    -156.0(4)  . . . . yes
 C(01A)    Ir(1)     P(1)      C(21A)    -43.0(5)   . . . . yes
 C(01A)    Ir(1)     P(1)      C(31A)    89.2(5)    . . . . yes
 C(01A)    Ir(1)     N(1)      C(11A)    129(58)    . . . . yes
 C(01A)    Ir(1)     N(1)      C(15A)    -50(58)    . . . . yes
 C(01A)    Ir(1)     C(1)      C(2)      91.3(6)    . . . . yes
 C(01A)    Ir(1)     C(1)      C(8)      -28.6(8)   . . . . yes
 C(01A)    Ir(1)     C(2)      C(3)      26.2(9)    . . . . yes
 C(01B)    Ir(2)     P(2)      C(16B)    150.1(4)   . . . . yes
 C(01B)    Ir(2)     P(2)      C(21B)    34.4(4)    . . . . yes
 C(01B)    Ir(2)     P(2)      C(31B)    -97.3(5)   . . . . yes
 C(01B)    Ir(2)     N(2)      C(11B)    3(4)       . . . . yes
 C(01B)    Ir(2)     N(2)      C(15B)    -173(3)    . . . . yes
 C(01B)    Ir(2)     C(5)      C(4)      22.8(8)    . . . . yes
 C(01B)    Ir(2)     C(5)      C(6)      -94.7(6)   . . . . yes
 C(01B)    Ir(2)     C(6)      C(5)      88.2(6)    . . . . yes
 C(01B)    Ir(2)     C(6)      C(7)      -31.4(9)   . . . . yes
 C(2)      Ir(1)     P(1)      C(16A)    -60.8(4)   . . . . yes
 C(2)      Ir(1)     P(1)      C(21A)    52.3(5)    . . . . yes
 C(2)      Ir(1)     P(1)      C(31A)    -175.5(5)  . . . . yes
 C(2)      Ir(1)     N(1)      C(11A)    79.5(6)    . . . . yes
 C(2)      Ir(1)     N(1)      C(15A)    -101.1(7)  . . . . yes
 C(2)      Ir(1)     C(1)      C(8)      -119.9(9)  . . . . yes
 C(2)      C(1)      Ir(1)     C(02A)    -177.0(6)  . . . . yes
 C(2)      C(1)      C(8)      C(7)      73(1)      . . . . yes
 C(2)      C(3)      C(4)      C(5)      106.3(10)  . . . . yes
 C(02A)    Ir(1)     P(1)      C(16A)    111.0(5)   . . . . yes
 C(02A)    Ir(1)     P(1)      C(21A)    -136.0(5)  . . . . yes
 C(02A)    Ir(1)     P(1)      C(31A)    -3.8(6)    . . . . yes
 C(02A)    Ir(1)     N(1)      C(11A)    -126.4(7)  . . . . yes
 C(02A)    Ir(1)     N(1)      C(15A)    52.9(7)    . . . . yes
 C(02A)    Ir(1)     C(1)      C(8)      63.1(8)    . . . . yes
 C(02A)    Ir(1)     C(2)      C(3)      123(1)     . . . . yes
 C(02B)    Ir(2)     P(2)      C(16B)    -116.4(5)  . . . . yes
 C(02B)    Ir(2)     P(2)      C(21B)    127.9(5)   . . . . yes
 C(02B)    Ir(2)     P(2)      C(31B)    -3.8(6)    . . . . yes
 C(02B)    Ir(2)     N(2)      C(11B)    134.5(7)   . . . . yes
 C(02B)    Ir(2)     N(2)      C(15B)    -42.5(7)   . . . . yes
 C(02B)    Ir(2)     C(5)      C(4)      -68.8(8)   . . . . yes
 C(02B)    Ir(2)     C(5)      C(6)      173.7(6)   . . . . yes
 C(02B)    Ir(2)     C(6)      C(5)      -10.7(9)   . . . . yes
 C(02B)    Ir(2)     C(6)      C(7)      -130.3(9)  . . . . yes
 C(3)      C(2)      C(1)      C(8)      2(1)       . . . . yes
 C(3)      C(4)      C(5)      C(6)      -77(1)     . . . . yes
 C(4)      C(5)      Ir(2)     C(6)      117.5(9)   . . . . yes
 C(4)      C(5)      C(6)      C(7)      2(1)       . . . . yes
 C(5)      Ir(2)     P(2)      C(16B)    50.0(4)    . . . . yes
 C(5)      Ir(2)     P(2)      C(21B)    -65.7(5)   . . . . yes
 C(5)      Ir(2)     P(2)      C(31B)    162.6(5)   . . . . yes
 C(5)      Ir(2)     N(2)      C(11B)    -117.1(6)  . . . . yes
 C(5)      Ir(2)     N(2)      C(15B)    65.8(7)    . . . . yes
 C(5)      Ir(2)     C(6)      C(7)      -119.6(10) . . . . yes
 C(5)      C(6)      C(7)      C(8)      73(1)      . . . . yes
 C(6)      Ir(2)     P(2)      C(16B)    54.1(3)    . . . . yes
 C(6)      Ir(2)     P(2)      C(21B)    -61.6(4)   . . . . yes
 C(6)      Ir(2)     P(2)      C(31B)    166.6(4)   . . . . yes
 C(6)      Ir(2)     N(2)      C(11B)    -79.3(6)   . . . . yes
 C(6)      Ir(2)     N(2)      C(15B)    103.6(7)   . . . . yes
 C(11A)    N(1)      C(15A)    C(14A)    -2(1)      . . . . yes
 C(11A)    C(12A)    C(13A)    C(14A)    -2(1)      . . . . yes
 C(11A)    C(16A)    P(1)      C(21A)    -158.4(5)  . . . . yes
 C(11A)    C(16A)    P(1)      C(31A)    91.4(6)    . . . . yes
 C(11B)    N(2)      C(15B)    C(14B)    -2(1)      . . . . yes
 C(11B)    C(12B)    C(13B)    C(14B)    1(1)       . . . . yes
 C(11B)    C(16B)    P(2)      C(21B)    164.2(6)   . . . . yes
 C(11B)    C(16B)    P(2)      C(31B)    -84.7(7)   . . . . yes
 C(12A)    C(11A)    N(1)      C(15A)    2(1)       . . . . yes
 C(12A)    C(13A)    C(14A)    C(15A)    1(1)       . . . . yes
 C(12B)    C(11B)    N(2)      C(15B)    2(1)       . . . . yes
 C(12B)    C(13B)    C(14B)    C(15B)    -1(1)      . . . . yes
 C(13A)    C(12A)    C(11A)    C(16A)    -178.2(9)  . . . . yes
 C(13B)    C(12B)    C(11B)    C(16B)    179.3(9)   . . . . yes
 C(15A)    N(1)      C(11A)    C(16A)    -179.3(7)  . . . . yes
 C(15B)    N(2)      C(11B)    C(16B)    -178.6(8)  . . . . yes
 C(16A)    P(1)      C(21A)    C(22A)    146.3(9)   . . . . yes
 C(16A)    P(1)      C(21A)    C(26A)    -36.5(9)   . . . . yes
 C(16A)    P(1)      C(31A)    C(32A)    39(1)      . . . . yes
 C(16A)    P(1)      C(31A)    C(36A)    -141.2(9)  . . . . yes
 C(16B)    P(2)      C(21B)    C(22B)    -176.5(8)  . . . . yes
 C(16B)    P(2)      C(21B)    C(26B)    2(1)       . . . . yes
 C(16B)    P(2)      C(31B)    C(32B)    -43.8(10)  . . . . yes
 C(16B)    P(2)      C(31B)    C(36B)    138.2(9)   . . . . yes
 C(21A)    P(1)      C(31A)    C(32A)    -70.8(10)  . . . . yes
 C(21A)    P(1)      C(31A)    C(36A)    108.6(9)   . . . . yes
 C(21A)    C(22A)    C(23A)    C(24A)    0(1)       . . . . yes
 C(21A)    C(26A)    C(25A)    C(24A)    -1(1)      . . . . yes
 C(21B)    P(2)      C(31B)    C(32B)    69.4(9)    . . . . yes
 C(21B)    P(2)      C(31B)    C(36B)    -108.6(9)  . . . . yes
 C(21B)    C(22B)    C(23B)    C(24B)    1(1)       . . . . yes
 C(21B)    C(26B)    C(25B)    C(24B)    1(1)       . . . . yes
 C(22A)    C(21A)    P(1)      C(31A)    -101.5(9)  . . . . yes
 C(22A)    C(21A)    C(26A)    C(25A)    1(1)       . . . . yes
 C(22A)    C(23A)    C(24A)    C(25A)    0(1)       . . . . yes
 C(22B)    C(21B)    P(2)      C(31B)    72.4(8)    . . . . yes
 C(22B)    C(21B)    C(26B)    C(25B)    0(1)       . . . . yes
 C(22B)    C(23B)    C(24B)    C(25B)    0(1)       . . . . yes
 C(23A)    C(22A)    C(21A)    C(26A)    0(1)       . . . . yes
 C(23A)    C(24A)    C(25A)    C(26A)    1(1)       . . . . yes
 C(23B)    C(22B)    C(21B)    C(26B)    -1(1)      . . . . yes
 C(23B)    C(24B)    C(25B)    C(26B)    0(1)       . . . . yes
 C(26A)    C(21A)    P(1)      C(31A)    75.7(9)    . . . . yes
 C(26B)    C(21B)    P(2)      C(31B)    -108.1(9)  . . . . yes
 C(31A)    C(32A)    C(33A)    C(34A)    1(1)       . . . . yes
 C(31A)    C(36A)    C(35A)    C(34A)    -2(1)      . . . . yes
 C(31B)    C(32B)    C(33B)    C(34B)    2(1)       . . . . yes
 C(31B)    C(36B)    C(35B)    C(34B)    -1(1)      . . . . yes
 C(32A)    C(31A)    C(36A)    C(35A)    0(1)       . . . . yes
 C(32A)    C(33A)    C(34A)    C(35A)    -3(1)      . . . . yes
 C(32B)    C(31B)    C(36B)    C(35B)    0(1)       . . . . yes
 C(32B)    C(33B)    C(34B)    C(35B)    -3(1)      . . . . yes
 C(33A)    C(32A)    C(31A)    C(36A)    0(1)       . . . . yes
 C(33A)    C(34A)    C(35A)    C(36A)    4(1)       . . . . yes
 C(33B)    C(32B)    C(31B)    C(36B)    -1(1)      . . . . yes
 C(33B)    C(34B)    C(35B)    C(36B)    2(1)       . . . . yes
 C(33B)    C(34B)    C(35B)    C(36B)    2(1)       . . . . yes
#------------------------------------------------------------------------------
loop_
_geom_contact_atom_site_label_1
_geom_contact_atom_site_label_2
_geom_contact_distance
_geom_contact_site_symmetry_1
_geom_contact_site_symmetry_2
_geom_contact_publ_flag
 Cl(1)     F(4)      3.30(1)    . 2_666 ?
 Cl(1)     O(02A)    3.34(1)    . 2_666 ?
 Cl(1)     F(2)      3.52(1)    . 2_666 ?
 Cl(1)     Cl(1)     3.597(7)   . 2_666 ?
 Cl(3)     O(01A)    3.35(1)    . 2_666 ?
 Cl(7)     Cl(10)    3.354(9)   . 2_667 ?
 Cl(8)     O(02B)    3.41(1)    . 1_455 ?
 Cl(9)     O(01B)    3.58(1)    . 1_455 ?
 Cl(11)    F(1)      3.47(2)    . 2_666 ?
 F(1)      C(16A)    3.31(1)    . 2_656 ?
 F(1)      C(16B)    3.45(1)    . 2_666 ?
 F(1)      C(44)     3.49(2)    . 2_666 ?
 F(1)      C(32A)    3.54(1)    . 2_656 ?
 F(1)      C(12B)    3.57(1)    . 2_666 ?
 F(2)      C(8)      3.24(1)    . 2_666 ?
 F(2)      C(7)      3.35(1)    . 2_666 ?
 F(2)      C(44)     3.35(2)    . 2_666 ?
 F(2)      C(6)      3.50(1)    . 2_666 ?
 F(3)      C(32A)    3.38(2)    . 2_656 ?
 F(4)      C(16B)    3.36(1)    . 2_666 ?
 F(4)      C(26B)    3.38(2)    . 2_666 ?
 F(4)      C(12A)    3.50(2)    . 2_656 ?
 F(5)      C(32B)    3.52(2)    . 2_777 ?
 F(5)      C(12B)    3.59(2)    . 2_777 ?
 F(5)      C(43)     3.59(2)    . 2_667 ?
 F(6)      C(16B)    3.53(2)    . 2_777 ?
 F(6)      C(32B)    3.53(2)    . 2_777 ?
 F(6)      C(12A)    3.55(2)    . 2_767 ?
 F(6)      C(16A)    3.59(2)    . 2_767 ?
 F(7)      C(16A)    3.35(2)    . 2_767 ?
 F(7)      C(2)      3.37(2)    . 2_767 ?
 F(7)      C(3)      3.55(2)    . 2_767 ?
 F(8)      C(42)     3.08(3)    . 2_767 ?
 F(8)      C(43)     3.22(2)    . 2_667 ?
 O(02A)    C(13A)    3.45(1)    . 2_656 ?
 O(02A)    C(25B)    3.51(2)    . 2_666 ?
 O(02B)    C(25A)    3.22(2)    . 2_767 ?
 O(02B)    C(24A)    3.37(2)    . 2_767 ?
 C(32B)    C(34A)    3.54(2)    . 1_665 ?
#------------------------------------------------------------------------------
#===END
data_General 
_audit_creation_date                  'Mon Aug 29 19:06:39 2005'
_audit_creation_method                'by teXsan'
_audit_update_record                   ?
#------------------------------------------------------------------------------
data_compound 10ca
#------------------------------------------------------------------------------
# CHEMICAL DATA 
_chemical_formula_sum                  'C58 H50 Ir N2 O2 P2 Rh '
_chemical_formula_moiety               'C58 H50 Ir N2 O2 P2 Rh '
_chemical_formula_weight               1164.12
_chemical_melting_point                ?
#------------------------------------------------------------------------------
# CRYSTAL DATA 
_symmetry_cell_setting                 triclinic
_symmetry_space_group_name_H-M        'P -1         '
_symmetry_Int_Tables_number            2
loop_
_symmetry_equiv_pos_as_xyz
x,y,z
-x,-y,-z
_cell_length_a                         12.835(9)
_cell_length_b                         14.471(8)
_cell_length_c                         15.382(8)
_cell_angle_alpha                      63.10(2)
_cell_angle_beta                       89.46(3)
_cell_angle_gamma                      86.39(3)
_cell_volume                           2542(2)
_cell_formula_units_Z                  2
_cell_measurement_reflns_used          16419
_cell_measurement_theta_min            3.0
_cell_measurement_theta_max            27.4
_cell_measurement_temperature          213
#------------------------------------------------------------------------------
_exptl_crystal_description            'unknown'
_exptl_crystal_colour                 'unknown'
_exptl_crystal_size_max                0.100
_exptl_crystal_size_mid                0.100
_exptl_crystal_size_min                0.100
_exptl_crystal_size_rad                ?
_exptl_crystal_density_diffrn          1.521
_exptl_crystal_density_meas            ?
_exptl_crystal_density_method         'not measured'
_exptl_absorpt_coefficient_mu          3.052
_exptl_absorpt_correction_type         multi-scan
_exptl_absorpt_process_details        '(Higashi, 1995)'
_exptl_absorpt_correction_T_min        0.269
_exptl_absorpt_correction_T_max        0.737
#------------------------------------------------------------------------------
# EXPERIMENTAL DATA 
_diffrn_ambient_temperature            213
_diffrn_radiation_type                'Mo K\a'
_diffrn_radiation_wavelength           0.7107
_diffrn_measurement_device_type       'Rigaku RAXIS-IV Imaging Plate'
_diffrn_measurement_method             \w
_diffrn_detector_area_resol_mean       10.00
_diffrn_reflns_number                  6484
_diffrn_reflns_av_R_equivalents        0.077
_diffrn_reflns_theta_min               ?
_diffrn_reflns_theta_max               27.43
_diffrn_reflns_limit_h_min             -16
_diffrn_reflns_limit_h_max             15
_diffrn_reflns_limit_k_min             -18
_diffrn_reflns_limit_k_max             18
_diffrn_reflns_limit_l_min             -18
_diffrn_reflns_limit_l_max             18
#------------------------------------------------------------------------------
# REFINEMENT DATA 
_refine_special_details
;
Refinement using reflections with F^2^ > -10.0 sigma(F^2^). The weighted 
R-factor (wR) and goodness of fit (S) are based on F^2^. R-factor (gt) are 
based on F. The threshold expression of F^2^ > 2.0 sigma(F^2^) is used only 
for calculating R-factor (gt).
;
_reflns_number_total                   5302
_reflns_number_gt                      2757
_reflns_threshold_expression                >2.0sigma(I)
_refine_ls_structure_factor_coef            Fsqd
_refine_ls_R_factor_gt                 0.0703
_refine_ls_wR_factor_ref               0.1817
_refine_ls_hydrogen_treatment          noref
_refine_ls_number_reflns               2757
_refine_ls_number_parameters           521
_refine_ls_goodness_of_fit_ref         0.943
_refine_ls_weighting_scheme            calc
_refine_ls_weighting_details               
   'w = 1/[\s^2^(Fo^2^) + (0.1000P)^2^+0.0000P] where P=(Fo^2^+2Fc^2^)/3'
_refine_ls_shift/su_max                0.0270
_refine_ls_extinction_method           SHELXL
_refine_ls_extinction_coef             0.0000
_refine_ls_extinction_expression
 'Fc^*^=kFc[1+0.001xFc^2^\l^3^/sin(2\q)]^-1/4^'
_refine_diff_density_max               1.58
_refine_diff_density_min               -1.38
loop_
_atom_type_symbol
_atom_type_description
_atom_type_scat_dispersion_real
_atom_type_scat_dispersion_imag
_atom_type_scat_source
  'C' 'C'  0.003 0.002 
;International Tables for Crystallography
(1992, Vol. C, Tables 4.2.6.8 and 6.1.1.4)
;
  'H' 'H'  0.000 0.000 
;International Tables for Crystallography
(1992, Vol. C, Table 6.1.1.4)
;
  'O' 'O'  0.011 0.006 
;International Tables for Crystallography
(1992, Vol. C, Tables 4.2.6.8 and 6.1.1.4)
;
  'N' 'N'  0.006 0.003 
;International Tables for Crystallography
(1992, Vol. C, Tables 4.2.6.8 and 6.1.1.4)
;
  'P' 'P'  0.102 0.094 
;International Tables for Crystallography
(1992, Vol. C, Tables 4.2.6.8 and 6.1.1.4)
;
  'Rh' 'Rh'  -1.118 0.919 
;International Tables for Crystallography
(1992, Vol. C, Tables 4.2.6.8 and 6.1.1.4)
;
  'Ir' 'Ir'  -1.444 7.990 
;International Tables for Crystallography
(1992, Vol. C, Tables 4.2.6.8 and 6.1.1.4)
;
#------------------------------------------------------------------------------
# ATOMIC COORDINATES AND DISPLACEMENT PARAMETERS 
loop_
_atom_site_label
_atom_site_type_symbol
_atom_site_fract_x
_atom_site_fract_y
_atom_site_fract_z
_atom_site_U_iso_or_equiv
_atom_site_adp_type
_atom_site_occupancy
_atom_site_calc_flag
_atom_site_refinement_flags
_atom_site_disorder_assembly
_atom_site_disorder_group
 Ir(1)  Ir 0.48112(5)  0.32129(5)  0.37445(6)  0.0476(3)   Uani 1.00 d . . .
 Rh(1)  Rh 0.38100(9)  0.53089(9)  0.1428(1)   0.0383(4)   Uani 1.00 d . . .
 P(1)   P  0.4676(3)   0.6697(3)   0.0424(4)   0.045(1)    Uani 1.00 d . . .
 P(2)   P  0.6409(4)   0.2686(3)   0.4513(4)   0.052(1)    Uani 1.00 d . . .
 O(01)  O  0.180(1)    0.657(1)    0.098(1)    0.090(6)    Uani 1.00 d . . .
 O(02)  O  0.352(1)    0.218(1)    0.552(1)    0.096(6)    Uani 1.00 d . . .
 N(1)   N  0.5361(10)  0.4745(10)  0.171(1)    0.045(4)    Uani 1.00 d . . .
 N(2)   N  0.5749(9)   0.3947(10)  0.2592(10)  0.041(4)    Uani 1.00 d . . .
 C(1)   C  0.356(1)    0.375(1)    0.279(1)    0.053(5)    Uani 1.00 d . . .
 C(01)  C  0.254(1)    0.602(2)    0.114(1)    0.056(5)    Uani 1.00 d . . .
 C(2)   C  0.283(1)    0.391(1)    0.224(1)    0.046(5)    Uani 1.00 d . . .
 C(02)  C  0.402(1)    0.267(2)    0.463(3)    0.15(2)     Uani 1.00 d . . .
 C(3)   C  0.182(1)    0.370(1)    0.197(1)    0.042(4)    Uani 1.00 d . . .
 C(4)   C  0.149(1)    0.406(1)    0.104(2)    0.058(5)    Uani 1.00 d . . .
 C(5)   C  0.053(1)    0.372(1)    0.085(2)    0.069(7)    Uani 1.00 d . . .
 C(6)   C  -0.008(1)   0.311(1)    0.158(2)    0.070(7)    Uani 1.00 d . . .
 C(7)   C  0.024(1)    0.278(1)    0.254(2)    0.082(9)    Uani 1.00 d . . .
 C(8)   C  0.118(1)    0.305(1)    0.272(1)    0.054(5)    Uani 1.00 d . . .
 C(9)   C  -0.110(2)   0.277(2)    0.132(2)    0.074(7)    Uani 1.00 d . . .
 C(11)  C  0.619(1)    0.517(1)    0.119(1)    0.053(5)    Uani 1.00 d . . .
 C(12)  C  0.711(1)    0.471(1)    0.171(1)    0.047(5)    Uani 1.00 d . . .
 C(13)  C  0.678(1)    0.394(1)    0.259(1)    0.046(5)    Uani 1.00 d . . .
 C(14)  C  0.593(1)    0.614(1)    0.023(1)    0.048(5)    Uani 1.00 d . . .
 C(15)  C  0.734(1)    0.317(1)    0.355(2)    0.056(5)    Uani 1.00 d . . .
 C(21)  C  0.414(1)    0.769(1)    -0.075(2)   0.056(5)    Uani 1.00 d . . .
 C(22)  C  0.337(1)    0.841(2)    -0.073(2)   0.071(7)    Uani 1.00 d . . .
 C(23)  C  0.299(2)    0.915(2)    -0.169(3)   0.09(1)     Uani 1.00 d . . .
 C(24)  C  0.328(3)    0.921(2)    -0.247(3)   0.11(1)     Uani 1.00 d . . .
 C(25)  C  0.401(2)    0.846(2)    -0.248(1)   0.078(8)    Uani 1.00 d . . .
 C(26)  C  0.449(1)    0.767(1)    -0.162(2)   0.068(7)    Uani 1.00 d . . .
 C(31)  C  0.506(1)    0.743(1)    0.105(1)    0.036(4)    Uani 1.00 d . . .
 C(32)  C  0.555(1)    0.837(1)    0.053(1)    0.052(5)    Uani 1.00 d . . .
 C(33)  C  0.585(2)    0.890(1)    0.109(2)    0.060(6)    Uani 1.00 d . . .
 C(34)  C  0.574(2)    0.849(2)    0.208(2)    0.070(7)    Uani 1.00 d . . .
 C(35)  C  0.529(2)    0.754(2)    0.257(2)    0.097(10)   Uani 1.00 d . . .
 C(36)  C  0.495(2)    0.707(1)    0.204(2)    0.065(6)    Uani 1.00 d . . .
 C(41)  C  0.681(1)    0.324(1)    0.529(2)    0.063(6)    Uani 1.00 d . . .
 C(42)  C  0.631(1)    0.416(2)    0.519(2)    0.066(6)    Uani 1.00 d . . .
 C(43)  C  0.664(2)    0.462(2)    0.571(2)    0.072(7)    Uani 1.00 d . . .
 C(44)  C  0.738(2)    0.421(2)    0.640(1)    0.071(7)    Uani 1.00 d . . .
 C(45)  C  0.788(2)    0.332(2)    0.653(3)    0.14(2)     Uani 1.00 d . . .
 C(46)  C  0.758(3)    0.284(2)    0.600(2)    0.13(1)     Uani 1.00 d . . .
 C(51)  C  0.672(1)    0.126(1)    0.515(1)    0.05222(5)  Uiso 1.00 d . . .
 C(52)  C  0.572(2)    0.074(2)    0.536(3)    0.04751(9)  Uiso 0.52 d P . .
 C(52A) C  0.622(3)    0.075(3)    0.619(3)    0.0585(1)   Uiso 0.48 d P . .
 C(53)  C  0.599(3)    -0.040(3)   0.575(3)    0.0581(1)   Uiso 0.52 d P . .
 C(53A) C  0.640(3)    -0.041(3)   0.663(4)    0.0678(1)   Uiso 0.48 d P . .
 C(54)  C  0.693(2)    -0.086(2)   0.612(2)    0.0974(1)   Uiso 1.00 d . . .
 C(55)  C  0.782(3)    -0.019(3)   0.578(3)    0.0567(1)   Uiso 0.52 d P . .
 C(55A) C  0.722(3)    -0.055(3)   0.555(4)    0.0640(1)   Uiso 0.48 d P . .
 C(56)  C  0.766(2)    0.095(3)    0.537(3)    0.0519(1)   Uiso 0.52 d P . .
 C(56A) C  0.730(3)    0.060(3)    0.484(3)    0.0505(1)   Uiso 0.48 d P . .
 C(61)  C  0.803(2)    0.612(2)    0.314(3)    0.088(9)    Uani 1.00 d . . .
 C(62)  C  0.827(2)    0.658(2)    0.225(3)    0.11(1)     Uani 1.00 d . . .
 C(63)  C  0.922(2)    0.630(2)    0.193(2)    0.084(7)    Uani 1.00 d . . .
 C(64)  C  0.985(2)    0.548(2)    0.258(3)    0.11(1)     Uani 1.00 d . . .
 C(65)  C  0.962(2)    0.499(2)    0.359(2)    0.091(9)    Uani 1.00 d . . .
 C(66)  C  0.869(2)    0.526(2)    0.386(2)    0.11(1)     Uani 1.00 d . . .
 C(71)  C  0.217(3)    0.111(4)    0.118(4)    0.1872(2)   Uiso 1.00 d . . .
 C(72)  C  0.164(2)    0.104(3)    0.050(3)    0.1160(1)   Uiso 1.00 d . . .
 C(73)  C  0.120(4)    0.043(5)    -0.004(5)   0.2458(3)   Uiso 1.00 d . . .
 C(74)  C  0.195(4)    -0.068(4)   0.085(4)    0.1873(2)   Uiso 1.00 d . . .
 C(75)  C  0.259(3)    -0.043(3)   0.136(3)    0.1402(2)   Uiso 1.00 d . . .
 C(76)  C  0.300(4)    0.010(4)    0.182(4)    0.1955(2)   Uiso 1.00 d . . .
 C(81)  C  1.002(3)    1.074(4)    -0.263(4)   0.1718(2)   Uiso 1.00 d . . .
 C(82)  C  0.985(3)    1.016(3)    -0.303(3)   0.1353(2)   Uiso 1.00 d . . .
 C(83)  C  1.039(5)    1.033(6)    -0.381(6)   0.2765(4)   Uiso 1.00 d . . .
 C(84)  C  1.05(1)     1.14(1)     -0.46(1)    0.587(1)    Uiso 1.00 d . . .
 C(85)  C  1.090(2)    1.187(2)    -0.407(3)   0.1056(1)   Uiso 1.00 d . . .
 C(86)  C  1.055(3)    1.173(3)    -0.320(4)   0.1517(2)   Uiso 1.00 d . . .
 H(1)   H  0.7816      0.4882      0.1520      0.0608      Uiso 1.00 calc . . .
 H(2)   H  0.5859      0.5937      -0.0300     0.0596      Uiso 1.00 calc . . .
 H(3)   H  0.6464      0.6613      0.0043      0.0596      Uiso 1.00 calc . . .
 H(4)   H  0.7891      0.3490      0.3691      0.0618      Uiso 1.00 calc . . .
 H(5)   H  0.7674      0.2590      0.3446      0.0618      Uiso 1.00 calc . . .
 H(6)   H  0.5679      0.8662      -0.0148     0.0632      Uiso 1.00 calc . . .
 H(7)   H  0.6167      0.9554      0.0754      0.0743      Uiso 1.00 calc . . .
 H(8)   H  0.5972      0.8859      0.2450      0.0808      Uiso 1.00 calc . . .
 H(9)   H  0.5232      0.7214      0.3280      0.1045      Uiso 1.00 calc . . .
 H(10)  H  0.4577      0.6446      0.2361      0.0781      Uiso 1.00 calc . . .
 H(11)  H  0.3110      0.8399      -0.0129     0.0862      Uiso 1.00 calc . . .
 H(12)  H  0.2412      0.9642      -0.1751     0.1118      Uiso 1.00 calc . . .
 H(13)  H  0.3056      0.9776      -0.3093     0.1302      Uiso 1.00 calc . . .
 H(14)  H  0.4223      0.8445      -0.3102     0.0929      Uiso 1.00 calc . . .
 H(15)  H  0.5020      0.7150      -0.1625     0.0788      Uiso 1.00 calc . . .
 H(16)  H  0.5724      0.4456      0.4761      0.0798      Uiso 1.00 calc . . .
 H(17)  H  0.6313      0.5297      0.5567      0.0838      Uiso 1.00 calc . . .
 H(18)  H  0.7564      0.4533      0.6796      0.0881      Uiso 1.00 calc . . .
 H(19)  H  0.8439      0.2997      0.6992      0.1606      Uiso 1.00 calc . . .
 H(20)  H  0.7971      0.2176      0.6070      0.1563      Uiso 1.00 calc . . .
 H(21)  H  0.1900      0.4523      0.0524      0.0688      Uiso 1.00 calc . . .
 H(22)  H  0.0311      0.3926      0.0171      0.0859      Uiso 1.00 calc . . .
 H(23)  H  -0.0189     0.2359      0.3081      0.0933      Uiso 1.00 calc . . .
 H(24)  H  0.1422      0.2797      0.3377      0.0643      Uiso 1.00 calc . . .
 H(25)  H  -0.1554     0.3334      0.0914      0.0880      Uiso 1.00 calc . . .
 H(26)  H  -0.0939     0.2350      0.0969      0.0880      Uiso 1.00 calc . . .
 H(27)  H  -0.1458     0.2326      0.1893      0.0880      Uiso 1.00 calc . . .

loop_
_atom_site_aniso_label
_atom_site_aniso_U_11
_atom_site_aniso_U_22
_atom_site_aniso_U_33
_atom_site_aniso_U_12
_atom_site_aniso_U_13
_atom_site_aniso_U_23
 Ir(1)  0.0638(4)   0.0442(4)   0.0356(4)   -0.0183(3)  0.0017(3)   -0.0167(3) 
 Rh(1)  0.0488(7)   0.0312(6)   0.0396(8)   -0.0101(5)  0.0078(6)   -0.0194(6) 
 P(1)   0.057(2)    0.035(2)    0.045(3)    -0.015(2)   0.012(2)    -0.018(2)  
 P(2)   0.070(3)    0.038(2)    0.045(3)    -0.011(2)   -0.007(2)   -0.016(2)  
 O(01)  0.062(8)    0.08(1)     0.12(2)     -0.006(7)   0.011(9)    -0.04(1)   
 O(02)  0.12(1)     0.16(2)     0.036(8)    -0.07(1)    0.040(8)    -0.06(1)   
 N(1)   0.064(8)    0.036(7)    0.032(8)    -0.006(6)   0.003(6)    -0.014(6)  
 N(2)   0.048(7)    0.048(7)    0.024(7)    -0.016(6)   0.005(5)    -0.013(6)  
 C(1)   0.08(1)     0.031(8)    0.05(1)     -0.032(8)   -0.003(9)   -0.011(8)  
 C(01)  0.051(10)   0.07(1)     0.05(1)     -0.013(9)   0.013(8)    -0.03(1)   
 C(2)   0.052(9)    0.024(7)    0.07(1)     -0.023(6)   0.020(9)    -0.027(8)  
 C(02)  0.05(1)     0.12(2)     0.39(6)     -0.03(1)    0.04(2)     -0.21(3)   
 C(3)   0.047(8)    0.034(8)    0.06(1)     0.008(6)    -0.001(8)   -0.039(8)  
 C(4)   0.07(1)     0.043(10)   0.06(1)     -0.009(8)   0.004(10)   -0.026(10) 
 C(5)   0.047(10)   0.06(1)     0.10(2)     0.016(8)    -0.03(1)    -0.04(1)   
 C(6)   0.047(10)   0.037(9)    0.12(2)     0.002(8)    0.01(1)     -0.03(1)   
 C(7)   0.06(1)     0.028(9)    0.12(2)     -0.004(8)   -0.02(1)    0.00(1)    
 C(8)   0.053(9)    0.043(9)    0.05(1)     -0.012(7)   -0.004(8)   -0.005(9)  
 C(9)   0.09(1)     0.09(2)     0.06(2)     -0.01(1)    -0.02(1)    -0.05(1)   
 C(11)  0.043(9)    0.06(1)     0.06(1)     -0.026(8)   0.017(8)    -0.029(10) 
 C(12)  0.041(8)    0.032(8)    0.06(1)     -0.006(6)   0.012(8)    -0.015(8)  
 C(13)  0.064(10)   0.042(9)    0.04(1)     -0.003(7)   0.027(8)    -0.024(8)  
 C(14)  0.061(10)   0.047(9)    0.029(10)   -0.014(7)   0.015(7)    -0.010(8)  
 C(15)  0.07(1)     0.041(9)    0.06(1)     0.002(8)    -0.007(9)   -0.023(9)  
 C(21)  0.06(1)     0.043(10)   0.08(2)     -0.009(8)   -0.008(10)  -0.04(1)   
 C(22)  0.05(1)     0.06(1)     0.11(2)     0.007(9)    0.00(1)     -0.05(1)   
 C(23)  0.08(2)     0.03(1)     0.14(3)     -0.013(9)   -0.02(2)    -0.02(2)   
 C(24)  0.12(2)     0.05(1)     0.10(3)     -0.03(1)    -0.04(2)    0.02(2)    
 C(25)  0.13(2)     0.06(1)     0.03(1)     -0.03(1)    -0.04(1)    -0.01(1)   
 C(26)  0.08(1)     0.015(7)    0.07(2)     -0.005(7)   -0.02(1)    0.014(9)   
 C(31)  0.043(8)    0.046(9)    0.05(1)     -0.002(6)   0.006(7)    -0.044(8)  
 C(32)  0.06(1)     0.07(1)     0.025(10)   0.003(8)    -0.001(7)   -0.021(9)  
 C(33)  0.11(1)     0.034(9)    0.05(1)     -0.018(9)   -0.01(1)    -0.027(9)  
 C(34)  0.07(1)     0.06(1)     0.08(2)     -0.008(10)  0.00(1)     -0.04(1)   
 C(35)  0.10(2)     0.11(2)     0.07(2)     -0.06(1)    0.02(1)     -0.02(2)   
 C(36)  0.09(1)     0.06(1)     0.06(2)     -0.04(1)    0.04(1)     -0.04(1)   
 C(41)  0.08(1)     0.040(9)    0.08(2)     -0.015(8)   -0.01(1)    -0.03(1)   
 C(42)  0.06(1)     0.08(1)     0.06(2)     -0.010(10)  0.008(10)   -0.03(1)   
 C(43)  0.08(1)     0.08(1)     0.09(2)     -0.02(1)    0.02(1)     -0.08(2)   
 C(44)  0.14(2)     0.06(1)     0.016(10)   -0.06(1)    0.00(1)     -0.015(10) 
 C(45)  0.14(2)     0.06(2)     0.15(3)     -0.02(2)    -0.09(2)    0.01(2)    
 C(46)  0.22(3)     0.05(1)     0.08(2)     -0.03(2)    -0.08(2)    0.02(1)    
 C(61)  0.10(2)     0.08(2)     0.13(3)     0.01(1)     0.01(2)     -0.08(2)   
 C(62)  0.11(2)     0.11(2)     0.11(3)     0.02(2)     0.02(2)     -0.06(2)   
 C(63)  0.16(2)     0.08(2)     0.04(1)     0.00(2)     0.00(1)     -0.05(1)   
 C(64)  0.09(2)     0.06(1)     0.17(3)     -0.02(1)    0.06(2)     -0.05(2)   
 C(65)  0.13(2)     0.05(1)     0.09(2)     -0.03(1)    -0.01(2)    -0.02(1)   
 C(66)  0.11(2)     0.10(2)     0.11(2)     -0.05(2)    0.05(2)     -0.04(2)   
#------------------------------------------------------------------------------
_computing_data_collection            'PROCESS-AUTO'
_computing_cell_refinement            'PROCESS-AUTO'
_computing_data_reduction             'teXsan Ver. 1.11'
_computing_structure_solution          SAPI91
_computing_structure_refinement       'SHELXL97'
_computing_publication_material       'teXsan Ver. 1.11'
_computing_molecular_graphics          ?
#------------------------------------------------------------------------------
_geom_special_details
;
 ?
;
loop_
_geom_bond_atom_site_label_1
_geom_bond_atom_site_label_2
_geom_bond_distance
_geom_bond_site_symmetry_1
_geom_bond_site_symmetry_2
_geom_bond_publ_flag
 Ir(1)     P(2)      2.284(5)   . . yes
 Ir(1)     N(2)      2.03(1)    . . yes
 Ir(1)     C(1)      2.05(2)    . . yes
 Ir(1)     C(02)     1.62(3)    . . yes
 Rh(1)     P(1)      2.258(4)   . . yes
 Rh(1)     N(1)      2.08(1)    . . yes
 Rh(1)     C(1)      2.32(1)    . . yes
 Rh(1)     C(01)     1.81(2)    . . yes
 Rh(1)     C(2)      2.29(1)    . . yes
 P(1)      C(14)     1.84(2)    . . yes
 P(1)      C(21)     1.83(2)    . . yes
 P(1)      C(31)     1.81(2)    . . yes
 P(2)      C(15)     1.80(2)    . . yes
 P(2)      C(41)     1.81(3)    . . yes
 P(2)      C(51)     1.85(2)    . . yes
 O(01)     C(01)     1.16(2)    . . yes
 O(02)     C(02)     1.39(4)    . . yes
 N(1)      N(2)      1.39(2)    . . yes
 N(1)      C(11)     1.34(2)    . . yes
 N(2)      C(13)     1.32(2)    . . yes
 C(1)      C(2)      1.20(3)    . . yes
 C(2)      C(3)      1.45(2)    . . yes
 C(3)      C(4)      1.35(3)    . . yes
 C(3)      C(8)      1.41(2)    . . yes
 C(4)      C(5)      1.43(3)    . . yes
 C(5)      C(6)      1.35(3)    . . yes
 C(6)      C(7)      1.39(4)    . . yes
 C(6)      C(9)      1.53(3)    . . yes
 C(7)      C(8)      1.36(3)    . . yes
 C(11)     C(12)     1.38(2)    . . yes
 C(11)     C(14)     1.52(2)    . . yes
 C(12)     C(13)     1.39(2)    . . yes
 C(13)     C(15)     1.53(2)    . . yes
 C(21)     C(22)     1.39(3)    . . yes
 C(21)     C(26)     1.43(4)    . . yes
 C(22)     C(23)     1.45(4)    . . yes
 C(23)     C(24)     1.21(6)    . . yes
 C(24)     C(25)     1.40(4)    . . yes
 C(25)     C(26)     1.41(3)    . . yes
 C(31)     C(32)     1.42(2)    . . yes
 C(31)     C(36)     1.39(3)    . . yes
 C(32)     C(33)     1.45(4)    . . yes
 C(33)     C(34)     1.37(4)    . . yes
 C(34)     C(35)     1.40(3)    . . yes
 C(35)     C(36)     1.37(5)    . . yes
 C(41)     C(42)     1.38(3)    . . yes
 C(41)     C(46)     1.38(4)    . . yes
 C(42)     C(43)     1.34(4)    . . yes
 C(43)     C(44)     1.33(3)    . . yes
 C(44)     C(45)     1.33(4)    . . yes
 C(45)     C(46)     1.36(6)    . . yes
 C(51)     C(52)     1.49(3)    . . yes
 C(51)     C(52A)    1.57(5)    . . yes
 C(51)     C(56)     1.26(3)    . . yes
 C(51)     C(56A)    1.42(5)    . . yes
 C(52)     C(52A)    1.43(7)    . . yes
 C(52)     C(53)     1.51(5)    . . yes
 C(52A)    C(53A)    1.51(6)    . . yes
 C(53)     C(53A)    1.44(8)    . . yes
 C(53)     C(54)     1.33(4)    . . yes
 C(53)     C(55A)    1.62(5)    . . yes
 C(53A)    C(54)     1.37(7)    . . yes
 C(54)     C(55)     1.48(4)    . . yes
 C(54)     C(55A)    0.88(6)    . . yes
 C(55)     C(55A)    1.11(7)    . . yes
 C(55)     C(56)     1.47(5)    . . yes
 C(55)     C(56A)    1.50(5)    . . yes
 C(55A)    C(56A)    1.53(5)    . . yes
 C(56)     C(56A)    1.23(7)    . . yes
 C(61)     C(62)     1.27(5)    . . yes
 C(61)     C(66)     1.46(4)    . . yes
 C(62)     C(63)     1.40(4)    . . yes
 C(63)     C(64)     1.37(3)    . . yes
 C(64)     C(65)     1.42(5)    . . yes
 C(65)     C(66)     1.36(4)    . . yes
 C(71)     C(72)     1.30(8)    . . yes
 C(71)     C(76)     1.66(6)    . . yes
 C(72)     C(73)     1.58(10)   . . yes
 C(73)     C(74)     1.79(7)    . . yes
 C(74)     C(75)     1.32(8)    . . yes
 C(75)     C(76)     1.37(9)    . . yes
 C(81)     C(82)     1.27(9)    . . yes
 C(81)     C(86)     1.50(6)    . . yes
 C(82)     C(83)     1.3(1)     . . yes
 C(83)     C(84)     1.5(2)     . . yes
 C(84)     C(85)     1.3(2)     . . yes
 C(85)     C(86)     1.34(7)    . . yes
#------------------------------------------------------------------------------
loop_
_geom_angle_atom_site_label_1
_geom_angle_atom_site_label_2
_geom_angle_atom_site_label_3
_geom_angle
_geom_angle_site_symmetry_1
_geom_angle_site_symmetry_2
_geom_angle_site_symmetry_3
_geom_angle_publ_flag
   P(2)      Ir(1)     N(2)      80.1(3)    . . . yes
   P(2)      Ir(1)     C(1)      167.6(6)   . . . yes
   P(2)      Ir(1)     C(02)     102(1)     . . . yes
   N(2)      Ir(1)     C(1)      88.2(6)    . . . yes
   N(2)      Ir(1)     C(02)     177.4(9)   . . . yes
   C(1)      Ir(1)     C(02)     89(1)      . . . yes
   P(1)      Rh(1)     N(1)      77.2(3)    . . . yes
   P(1)      Rh(1)     C(1)      156.9(5)   . . . yes
   P(1)      Rh(1)     C(01)     94.0(6)    . . . yes
   P(1)      Rh(1)     C(2)      171.6(6)   . . . yes
   N(1)      Rh(1)     C(1)      82.0(5)    . . . yes
   N(1)      Rh(1)     C(01)     169.6(8)   . . . yes
   N(1)      Rh(1)     C(2)      106.4(5)   . . . yes
   C(1)      Rh(1)     C(01)     105.5(7)   . . . yes
   C(1)      Rh(1)     C(2)      30.3(7)    . . . yes
   C(01)     Rh(1)     C(2)      83.1(7)    . . . yes
   Rh(1)     P(1)      C(14)     104.6(5)   . . . yes
   Rh(1)     P(1)      C(21)     123.5(6)   . . . yes
   Rh(1)     P(1)      C(31)     111.0(5)   . . . yes
   C(14)     P(1)      C(21)     109.6(9)   . . . yes
   C(14)     P(1)      C(31)     102.6(8)   . . . yes
   C(21)     P(1)      C(31)     103.8(9)   . . . yes
   Ir(1)     P(2)      C(15)     105.0(6)   . . . yes
   Ir(1)     P(2)      C(41)     118.8(6)   . . . yes
   Ir(1)     P(2)      C(51)     115.8(6)   . . . yes
   C(15)     P(2)      C(41)     101(1)     . . . yes
   C(15)     P(2)      C(51)     105.1(8)   . . . yes
   C(41)     P(2)      C(51)     108.7(9)   . . . yes
   Rh(1)     N(1)      N(2)      124.9(9)   . . . yes
   Rh(1)     N(1)      C(11)     127.9(9)   . . . yes
   N(2)      N(1)      C(11)     106(1)     . . . yes
   Ir(1)     N(2)      N(1)      121.9(9)   . . . yes
   Ir(1)     N(2)      C(13)     128(1)     . . . yes
   N(1)      N(2)      C(13)     108(1)     . . . yes
   Ir(1)     C(1)      Rh(1)     113.5(8)   . . . yes
   Ir(1)     C(1)      C(2)      169(1)     . . . yes
   Rh(1)     C(1)      C(2)      73.3(9)    . . . yes
   Rh(1)     C(01)     O(01)     171(2)     . . . yes
   Rh(1)     C(2)      C(1)      76(1)      . . . yes
   Rh(1)     C(2)      C(3)      129(1)     . . . yes
   C(1)      C(2)      C(3)      153(1)     . . . yes
   Ir(1)     C(02)     O(02)     168(2)     . . . yes
   C(2)      C(3)      C(4)      123(1)     . . . yes
   C(2)      C(3)      C(8)      118(1)     . . . yes
   C(4)      C(3)      C(8)      117(1)     . . . yes
   C(3)      C(4)      C(5)      119(1)     . . . yes
   C(4)      C(5)      C(6)      122(2)     . . . yes
   C(5)      C(6)      C(7)      118(2)     . . . yes
   C(5)      C(6)      C(9)      119(2)     . . . yes
   C(7)      C(6)      C(9)      121(1)     . . . yes
   C(6)      C(7)      C(8)      119(1)     . . . yes
   C(3)      C(8)      C(7)      122(1)     . . . yes
   N(1)      C(11)     C(12)     111(1)     . . . yes
   N(1)      C(11)     C(14)     114(1)     . . . yes
   C(12)     C(11)     C(14)     133(1)     . . . yes
   C(11)     C(12)     C(13)     104(1)     . . . yes
   N(2)      C(13)     C(12)     110(1)     . . . yes
   N(2)      C(13)     C(15)     115(1)     . . . yes
   C(12)     C(13)     C(15)     134(1)     . . . yes
   P(1)      C(14)     C(11)     105(1)     . . . yes
   P(2)      C(15)     C(13)     109(1)     . . . yes
   P(1)      C(21)     C(22)     117(2)     . . . yes
   P(1)      C(21)     C(26)     118(1)     . . . yes
   C(22)     C(21)     C(26)     123(1)     . . . yes
   C(21)     C(22)     C(23)     113(2)     . . . yes
   C(22)     C(23)     C(24)     127(2)     . . . yes
   C(23)     C(24)     C(25)     118(2)     . . . yes
   C(24)     C(25)     C(26)     123(2)     . . . yes
   C(21)     C(26)     C(25)     113(1)     . . . yes
   P(1)      C(31)     C(32)     120(1)     . . . yes
   P(1)      C(31)     C(36)     122(1)     . . . yes
   C(32)     C(31)     C(36)     117(2)     . . . yes
   C(31)     C(32)     C(33)     117(1)     . . . yes
   C(32)     C(33)     C(34)     122(1)     . . . yes
   C(33)     C(34)     C(35)     119(2)     . . . yes
   C(34)     C(35)     C(36)     118(2)     . . . yes
   C(31)     C(36)     C(35)     125(1)     . . . yes
   P(2)      C(41)     C(42)     118(1)     . . . yes
   P(2)      C(41)     C(46)     126(1)     . . . yes
   C(42)     C(41)     C(46)     114(2)     . . . yes
   C(41)     C(42)     C(43)     119(1)     . . . yes
   C(42)     C(43)     C(44)     124(2)     . . . yes
   C(43)     C(44)     C(45)     118(2)     . . . yes
   C(44)     C(45)     C(46)     119(2)     . . . yes
   C(41)     C(46)     C(45)     123(2)     . . . yes
   P(2)      C(51)     C(52)     108(1)     . . . yes
   P(2)      C(51)     C(52A)    111(2)     . . . yes
   P(2)      C(51)     C(56)     117(1)     . . . yes
   P(2)      C(51)     C(56A)    130(1)     . . . yes
   C(52)     C(51)     C(52A)    55(2)      . . . yes
   C(52)     C(51)     C(56)     134(2)     . . . yes
   C(52)     C(51)     C(56A)    99(2)      . . . yes
   C(52A)    C(51)     C(56)     100(2)     . . . yes
   C(52A)    C(51)     C(56A)    117(2)     . . . yes
   C(56)     C(51)     C(56A)    54(2)      . . . yes
   C(51)     C(52)     C(52A)    65(2)      . . . yes
   C(51)     C(52)     C(53)     106(2)     . . . yes
   C(52A)    C(52)     C(53)     91(2)      . . . yes
   C(51)     C(52A)    C(52)     59(2)      . . . yes
   C(51)     C(52A)    C(53A)    109(3)     . . . yes
   C(52)     C(52A)    C(53A)    88(3)      . . . yes
   C(52)     C(53)     C(53A)    88(3)      . . . yes
   C(52)     C(53)     C(54)     123(3)     . . . yes
   C(52)     C(53)     C(55A)    107(2)     . . . yes
   C(53A)    C(53)     C(54)     58(3)      . . . yes
   C(53A)    C(53)     C(55A)    83(3)      . . . yes
   C(54)     C(53)     C(55A)    32(2)      . . . yes
   C(52A)    C(53A)    C(53)     90(3)      . . . yes
   C(52A)    C(53A)    C(54)     120(3)     . . . yes
   C(53)     C(53A)    C(54)     56(3)      . . . yes
   C(53)     C(54)     C(53A)    64(3)      . . . yes
   C(53)     C(54)     C(55)     116(2)     . . . yes
   C(53)     C(54)     C(55A)    91(3)      . . . yes
   C(53A)    C(54)     C(55)     100(3)     . . . yes
   C(53A)    C(54)     C(55A)    128(4)     . . . yes
   C(55)     C(54)     C(55A)    48(4)      . . . yes
   C(54)     C(55)     C(55A)    36(3)      . . . yes
   C(54)     C(55)     C(56)     121(2)     . . . yes
   C(54)     C(55)     C(56A)    96(2)      . . . yes
   C(55A)    C(55)     C(56)     113(3)     . . . yes
   C(55A)    C(55)     C(56A)    70(3)      . . . yes
   C(56)     C(55)     C(56A)    48(2)      . . . yes
   C(53)     C(55A)    C(54)     55(3)      . . . yes
   C(53)     C(55A)    C(55)     121(5)     . . . yes
   C(53)     C(55A)    C(56A)    94(2)      . . . yes
   C(54)     C(55A)    C(55)     95(6)      . . . yes
   C(54)     C(55A)    C(56A)    131(6)     . . . yes
   C(55)     C(55A)    C(56A)    67(3)      . . . yes
   C(51)     C(56)     C(55)     112(2)     . . . yes
   C(51)     C(56)     C(56A)    69(2)      . . . yes
   C(55)     C(56)     C(56A)    66(3)      . . . yes
   C(51)     C(56A)    C(55)     102(3)     . . . yes
   C(51)     C(56A)    C(55A)    112(3)     . . . yes
   C(51)     C(56A)    C(56)     56(2)      . . . yes
   C(55)     C(56A)    C(55A)    42(2)      . . . yes
   C(55)     C(56A)    C(56)     64(2)      . . . yes
   C(55A)    C(56A)    C(56)     102(3)     . . . yes
   C(62)     C(61)     C(66)     121(2)     . . . yes
   C(61)     C(62)     C(63)     120(2)     . . . yes
   C(62)     C(63)     C(64)     119(2)     . . . yes
   C(63)     C(64)     C(65)     120(2)     . . . yes
   C(64)     C(65)     C(66)     117(2)     . . . yes
   C(61)     C(66)     C(65)     119(2)     . . . yes
   C(72)     C(71)     C(76)     114(5)     . . . yes
   C(71)     C(72)     C(73)     153(3)     . . . yes
   C(72)     C(73)     C(74)     85(3)      . . . yes
   C(73)     C(74)     C(75)     111(4)     . . . yes
   C(74)     C(75)     C(76)     160(4)     . . . yes
   C(71)     C(76)     C(75)     89(4)      . . . yes
   C(82)     C(81)     C(86)     119(4)     . . . yes
   C(81)     C(82)     C(83)     115(5)     . . . yes
   C(82)     C(83)     C(84)     118(10)    . . . yes
   C(83)     C(84)     C(85)     105(12)    . . . yes
   C(84)     C(85)     C(86)     121(7)     . . . yes
   C(81)     C(86)     C(85)     115(5)     . . . yes
#------------------------------------------------------------------------------
loop_
_geom_torsion_atom_site_label_1
_geom_torsion_atom_site_label_2
_geom_torsion_atom_site_label_3
_geom_torsion_atom_site_label_4
_geom_torsion
_geom_torsion_site_symmetry_1
_geom_torsion_site_symmetry_2
_geom_torsion_site_symmetry_3
_geom_torsion_site_symmetry_4
_geom_torsion_publ_flag
# -- ENTER TORSION ANGLES HERE, ONE PER LINE --
# e.g. C1 C2 C3 C4 109.4(3) . . . . yes
       ?  ?  ?  ?  ?     ? ? ? ?  ?
#------------------------------------------------------------------------------
loop_
_geom_contact_atom_site_label_1
_geom_contact_atom_site_label_2
_geom_contact_distance
_geom_contact_site_symmetry_1
_geom_contact_site_symmetry_2
_geom_contact_publ_flag
 O(01)     C(9)      3.34(3)    . 2_565 ?
 O(01)     C(64)     3.41(3)    . 1_455 ?
 O(01)     C(63)     3.58(3)    . 1_455 ?
 O(02)     C(85)     3.44(3)    . 1_446 ?
 O(02)     C(34)     3.49(3)    . 2_666 ?
 O(02)     C(35)     3.52(4)    . 2_666 ?
 O(02)     C(55A)    3.60(7)    . 2_656 ?
 N(1)      C(26)     3.55(3)    . 2_665 ?
 N(2)      C(26)     3.32(3)    . 2_665 ?
 N(2)      C(25)     3.56(3)    . 2_665 ?
 C(02)     C(53)     3.58(6)    . 2_656 ?
 C(02)     C(54)     3.59(6)    . 2_656 ?
 C(25)     C(53A)    3.54(5)    . 1_564 ?
 C(52)     C(53)     2.99(6)    . 2_656 ?
 C(52)     C(52)     3.46(8)    . 2_656 ?
 C(52A)    C(76)     2.91(8)    . 2_656 ?
 C(53)     C(53)     3.24(7)    . 2_656 ?
 C(53A)    C(76)     2.76(9)    . 2_656 ?
 C(53A)    C(71)     3.54(8)    . 2_656 ?
 C(55)     C(82)     3.39(6)    . 1_546 ?
 C(55)     C(83)     3.55(8)    . 1_546 ?
 C(56)     C(82)     3.53(5)    . 1_546 ?
 C(73)     C(73)     3.4(1)     . 2_555 ?
#------------------------------------------------------------------------------
#===END
data_General 
_audit_creation_date                  'Fri Aug 26 21:29:43 2005'
_audit_creation_method                'by teXsan'
_audit_update_record                   ?
#------------------------------------------------------------------------------
data_compound 11ab
#------------------------------------------------------------------------------
# CHEMICAL DATA 
_chemical_formula_sum                  'C28 H26 N3 O2 P Rh2 Si '
_chemical_formula_moiety               'C28 H26 N3 O2 P Rh2 Si '
_chemical_formula_weight               701.40
_chemical_melting_point                ?
#------------------------------------------------------------------------------
# CRYSTAL DATA 
_symmetry_cell_setting                 monoclinic
_symmetry_space_group_name_H-M        'P 1 21/c 1'
_symmetry_Int_Tables_number            14
loop_
_symmetry_equiv_pos_as_xyz
x,y,z
-x,1/2+y,1/2-z
-x,-y,-z
x,1/2-y,1/2+z
_cell_length_a                         13.491(8)
_cell_length_b                         11.856(3)
_cell_length_c                         17.317(10)
_cell_angle_alpha                      90
_cell_angle_beta                       102.72(1)
_cell_angle_gamma                      90
_cell_volume                           2701(2)
_cell_formula_units_Z                  4
_cell_measurement_reflns_used          6173
_cell_measurement_theta_min            3.1
_cell_measurement_theta_max            27.2
_cell_measurement_temperature          213
#------------------------------------------------------------------------------
_exptl_crystal_description            'unknown'
_exptl_crystal_colour                 'unknown'
_exptl_crystal_size_max                0.100
_exptl_crystal_size_mid                0.100
_exptl_crystal_size_min                0.100
_exptl_crystal_size_rad                ?
_exptl_crystal_density_diffrn          1.724
_exptl_crystal_density_meas            ?
_exptl_crystal_density_method         'not measured'
_exptl_absorpt_coefficient_mu          1.353
_exptl_absorpt_correction_type         multi-scan
_exptl_absorpt_process_details        '(Higashi, 1995)'
_exptl_absorpt_correction_T_min        0.524
_exptl_absorpt_correction_T_max        0.872
#------------------------------------------------------------------------------
# EXPERIMENTAL DATA 
_diffrn_ambient_temperature            213
_diffrn_radiation_type                'Mo K\a'
_diffrn_radiation_wavelength           0.7107
_diffrn_measurement_device_type       'Rigaku RAXIS-IV Imaging Plate'
_diffrn_measurement_method             \w
_diffrn_detector_area_resol_mean       10.00
_diffrn_reflns_number                  16544
_diffrn_reflns_av_R_equivalents        0.211
_diffrn_reflns_theta_min               ?
_diffrn_reflns_theta_max               27.49
_diffrn_reflns_limit_h_min             -17
_diffrn_reflns_limit_h_max             17
_diffrn_reflns_limit_k_min             -14
_diffrn_reflns_limit_k_max             14
_diffrn_reflns_limit_l_min             -22
_diffrn_reflns_limit_l_max             20
#------------------------------------------------------------------------------
# REFINEMENT DATA 
_refine_special_details
;
Refinement using reflections with F^2^ > -10.0 sigma(F^2^). The weighted 
R-factor (wR) and goodness of fit (S) are based on F^2^. R-factor (gt) are 
based on F. The threshold expression of F^2^ > 2.0 sigma(F^2^) is used only 
for calculating R-factor (gt).
;
_reflns_number_total                   5925
_reflns_number_gt                      1961
_reflns_threshold_expression                >2.0sigma(I)
_refine_ls_structure_factor_coef            Fsqd
_refine_ls_R_factor_gt                 0.0711
_refine_ls_wR_factor_ref               0.2125
_refine_ls_hydrogen_treatment          noref
_refine_ls_number_reflns               1961
_refine_ls_number_parameters           334
_refine_ls_goodness_of_fit_ref         0.748
_refine_ls_weighting_scheme            calc
_refine_ls_weighting_details               
   'w = 1/[\s^2^(Fo^2^) + (0.1000P)^2^+0.0000P] where P=(Fo^2^+2Fc^2^)/3'
_refine_ls_shift/su_max                0.0000
_refine_ls_extinction_method           SHELXL
_refine_ls_extinction_coef             0.0000
_refine_ls_extinction_expression
 'Fc^*^=kFc[1+0.001xFc^2^\l^3^/sin(2\q)]^-1/4^'
_refine_diff_density_max               0.78
_refine_diff_density_min               -1.19
loop_
_atom_type_symbol
_atom_type_description
_atom_type_scat_dispersion_real
_atom_type_scat_dispersion_imag
_atom_type_scat_source
  'C' 'C'  0.003 0.002 
;International Tables for Crystallography
(1992, Vol. C, Tables 4.2.6.8 and 6.1.1.4)
;
  'H' 'H'  0.000 0.000 
;International Tables for Crystallography
(1992, Vol. C, Table 6.1.1.4)
;
  'O' 'O'  0.011 0.006 
;International Tables for Crystallography
(1992, Vol. C, Tables 4.2.6.8 and 6.1.1.4)
;
  'N' 'N'  0.006 0.003 
;International Tables for Crystallography
(1992, Vol. C, Tables 4.2.6.8 and 6.1.1.4)
;
  'Si' 'Si'  0.082 0.070 
;International Tables for Crystallography
(1992, Vol. C, Tables 4.2.6.8 and 6.1.1.4)
;
  'P' 'P'  0.102 0.094 
;International Tables for Crystallography
(1992, Vol. C, Tables 4.2.6.8 and 6.1.1.4)
;
  'Rh' 'Rh'  -1.118 0.919 
;International Tables for Crystallography
(1992, Vol. C, Tables 4.2.6.8 and 6.1.1.4)
;
#------------------------------------------------------------------------------
# ATOMIC COORDINATES AND DISPLACEMENT PARAMETERS 
loop_
_atom_site_label
_atom_site_type_symbol
_atom_site_fract_x
_atom_site_fract_y
_atom_site_fract_z
_atom_site_U_iso_or_equiv
_atom_site_adp_type
_atom_site_occupancy
_atom_site_calc_flag
_atom_site_refinement_flags
_atom_site_disorder_assembly
_atom_site_disorder_group
 Rh(1)  Rh 0.84782(8)  0.08584(9)  0.27450(7)  0.0377(3)   Uani 1.00 d . . .
 Rh(2)  Rh 0.59149(8)  0.10403(9)  0.12086(7)  0.0397(3)   Uani 1.00 d . . .
 P(1)   P  0.9995(3)   0.1626(3)   0.2755(2)   0.0395(9)   Uani 1.00 d . . .
 Si(1)  Si 0.6675(3)   -0.1101(4)  0.3564(3)   0.047(1)    Uani 1.00 d . . .
 O(01)  O  0.9412(8)   -0.0429(9)  0.4193(6)   0.061(3)    Uani 1.00 d . . .
 O(02)  O  0.3920(8)   -0.0037(9)  0.1224(7)   0.062(3)    Uani 1.00 d . . .
 N(1)   N  0.8123(8)   0.1747(9)   0.1682(7)   0.039(3)    Uani 1.00 d . . .
 N(2)   N  0.7213(8)   0.1686(9)   0.1143(7)   0.038(3)    Uani 1.00 d . . .
 N(3)   N  0.5580(9)   0.186(1)    0.0088(7)   0.045(3)    Uani 1.00 d . . .
 C(1)   C  0.659(1)    0.036(1)    0.226(1)    0.050(4)    Uani 1.00 d . . .
 C(01)  C  0.901(1)    0.008(1)    0.3654(9)   0.048(4)    Uani 1.00 d . . .
 C(2)   C  0.7020(10)  -0.006(1)   0.2888(9)   0.039(3)    Uani 1.00 d . . .
 C(02)  C  0.471(1)    0.041(1)    0.1213(9)   0.045(4)    Uani 1.00 d . . .
 C(3)   C  0.723(1)    -0.247(1)   0.337(1)    0.060(4)    Uani 1.00 d . . .
 C(4)   C  0.715(1)    -0.074(1)   0.4645(9)   0.066(5)    Uani 1.00 d . . .
 C(5)   C  0.527(1)    -0.115(1)   0.335(1)    0.066(5)    Uani 1.00 d . . .
 C(11)  C  0.878(1)    0.235(1)    0.134(1)    0.049(4)    Uani 1.00 d . . .
 C(12)  C  0.829(1)    0.273(1)    0.0605(8)   0.042(4)    Uani 1.00 d . . .
 C(13)  C  0.732(1)    0.229(1)    0.0497(9)   0.043(4)    Uani 1.00 d . . .
 C(14)  C  0.9807(10)  0.258(1)    0.1874(9)   0.042(4)    Uani 1.00 d . . .
 C(21)  C  0.639(1)    0.237(1)    -0.0115(9)  0.045(4)    Uani 1.00 d . . .
 C(22)  C  0.630(1)    0.286(1)    -0.086(1)   0.052(4)    Uani 1.00 d . . .
 C(23)  C  0.537(1)    0.290(1)    -0.1363(9)  0.053(4)    Uani 1.00 d . . .
 C(24)  C  0.454(1)    0.244(1)    -0.1155(9)  0.052(4)    Uani 1.00 d . . .
 C(25)  C  0.467(1)    0.193(1)    -0.044(1)   0.051(4)    Uani 1.00 d . . .
 C(31)  C  1.0980(9)   0.067(1)    0.2629(8)   0.038(3)    Uani 1.00 d . . .
 C(32)  C  1.090(1)    0.006(1)    0.1928(9)   0.049(4)    Uani 1.00 d . . .
 C(33)  C  1.166(1)    -0.063(1)   0.181(1)    0.052(4)    Uani 1.00 d . . .
 C(34)  C  1.250(1)    -0.085(1)   0.243(1)    0.058(4)    Uani 1.00 d . . .
 C(35)  C  1.257(1)    -0.035(2)   0.316(1)    0.065(5)    Uani 1.00 d . . .
 C(36)  C  1.181(1)    0.044(1)    0.3245(10)  0.054(4)    Uani 1.00 d . . .
 C(41)  C  1.0623(10)  0.256(1)    0.3563(9)   0.046(4)    Uani 1.00 d . . .
 C(42)  C  1.144(1)    0.319(1)    0.3509(9)   0.050(4)    Uani 1.00 d . . .
 C(43)  C  1.186(1)    0.396(1)    0.4070(10)  0.049(4)    Uani 1.00 d . . .
 C(44)  C  1.147(1)    0.404(1)    0.4760(9)   0.055(4)    Uani 1.00 d . . .
 C(45)  C  1.067(1)    0.339(2)    0.4847(10)  0.063(5)    Uani 1.00 d . . .
 C(46)  C  1.021(1)    0.264(1)    0.4251(10)  0.047(4)    Uani 1.00 d . . .
 H(1)   H  0.7065      -0.3028     0.3734      0.0598      Uiso 1.00 calc . . .
 H(2)   H  0.7947      -0.2404     0.3452      0.0598      Uiso 1.00 calc . . .
 H(3)   H  0.6941      -0.2704     0.2840      0.0598      Uiso 1.00 calc . . .
 H(4)   H  0.7091      -0.1386     0.4962      0.0657      Uiso 1.00 calc . . .
 H(5)   H  0.6757      -0.0129     0.4783      0.0657      Uiso 1.00 calc . . .
 H(6)   H  0.7853      -0.0515     0.4734      0.0657      Uiso 1.00 calc . . .
 H(7)   H  0.5025      -0.0492     0.3584      0.0661      Uiso 1.00 calc . . .
 H(8)   H  0.5058      -0.1814     0.3587      0.0661      Uiso 1.00 calc . . .
 H(9)   H  0.5008      -0.1150     0.2796      0.0661      Uiso 1.00 calc . . .
 H(10)  H  0.8568      0.3214      0.0249      0.0499      Uiso 1.00 calc . . .
 H(11)  H  0.9849      0.3350      0.2049      0.0502      Uiso 1.00 calc . . .
 H(12)  H  1.0338      0.2451      0.1599      0.0502      Uiso 1.00 calc . . .
 H(13)  H  0.6884      0.3175      -0.1015     0.0621      Uiso 1.00 calc . . .
 H(14)  H  0.5324      0.3274      -0.1874     0.0629      Uiso 1.00 calc . . .
 H(15)  H  0.3880      0.2464      -0.1522     0.0658      Uiso 1.00 calc . . .
 H(16)  H  0.4064      0.1598      -0.0287     0.0593      Uiso 1.00 calc . . .
 H(17)  H  1.0294      0.0167      0.1512      0.0571      Uiso 1.00 calc . . .
 H(18)  H  1.1618      -0.0989     0.1284      0.0634      Uiso 1.00 calc . . .
 H(19)  H  1.3015      -0.1396     0.2356      0.0685      Uiso 1.00 calc . . .
 H(20)  H  1.3138      -0.0507     0.3603      0.0789      Uiso 1.00 calc . . .
 H(21)  H  1.1877      0.0847      0.3746      0.0659      Uiso 1.00 calc . . .
 H(22)  H  1.1748      0.3054      0.3049      0.0619      Uiso 1.00 calc . . .
 H(23)  H  1.2390      0.4456      0.3983      0.0601      Uiso 1.00 calc . . .
 H(24)  H  1.1776      0.4571      0.5179      0.0668      Uiso 1.00 calc . . .
 H(25)  H  1.0433      0.3386      0.5342      0.0712      Uiso 1.00 calc . . .
 H(26)  H  0.9636      0.2188      0.4300      0.0559      Uiso 1.00 calc . . .

loop_
_atom_site_aniso_label
_atom_site_aniso_U_11
_atom_site_aniso_U_22
_atom_site_aniso_U_33
_atom_site_aniso_U_12
_atom_site_aniso_U_13
_atom_site_aniso_U_23
 Rh(1)  0.0350(6)   0.0411(6)   0.0366(7)   -0.0040(5)  0.0072(5)   0.0019(5)  
 Rh(2)  0.0364(6)   0.0428(7)   0.0397(7)   0.0014(5)   0.0078(5)   0.0025(6)  
 P(1)   0.036(2)    0.046(2)    0.037(2)    -0.004(2)   0.009(2)    0.000(2)   
 Si(1)  0.045(2)    0.050(3)    0.047(3)    -0.002(2)   0.011(2)    0.008(2)   
 O(01)  0.075(8)    0.069(7)    0.031(6)    -0.005(6)   -0.002(6)   0.002(6)   
 O(02)  0.053(7)    0.059(7)    0.078(9)    -0.004(6)   0.019(6)    0.007(6)   
 N(1)   0.038(6)    0.037(6)    0.043(8)    -0.002(5)   0.008(6)    0.002(5)   
 N(2)   0.031(6)    0.045(7)    0.030(7)    0.006(5)    -0.008(5)   0.001(5)   
 N(3)   0.047(7)    0.061(8)    0.028(7)    0.010(6)    0.008(6)    0.009(6)   
 C(1)   0.031(8)    0.037(8)    0.09(1)     0.004(6)    0.030(9)    -0.016(9)  
 C(01)  0.050(9)    0.06(1)     0.025(9)    0.007(8)    -0.007(7)   0.000(7)   
 C(2)   0.025(7)    0.057(9)    0.035(9)    -0.011(6)   0.006(6)    -0.005(7)  
 C(02)  0.059(10)   0.027(8)    0.045(10)   0.007(7)    0.003(8)    -0.002(6)  
 C(3)   0.054(10)   0.07(1)     0.05(1)     0.007(9)    0.014(9)    0.001(9)   
 C(4)   0.09(1)     0.08(1)     0.033(9)    -0.013(10)  0.017(9)    0.002(8)   
 C(5)   0.058(10)   0.07(1)     0.07(1)     -0.002(9)   0.029(9)    0.013(10)  
 C(11)  0.041(8)    0.041(9)    0.07(1)     -0.005(7)   0.014(8)    -0.006(7)  
 C(12)  0.045(8)    0.052(9)    0.028(9)    0.003(7)    0.008(7)    0.021(7)   
 C(13)  0.032(8)    0.047(9)    0.041(10)   -0.005(6)   -0.010(7)   0.002(7)   
 C(14)  0.037(8)    0.049(9)    0.038(9)    -0.003(6)   0.007(7)    0.011(7)   
 C(21)  0.046(9)    0.047(9)    0.039(10)   0.009(7)    0.001(7)    0.005(7)   
 C(22)  0.050(9)    0.046(9)    0.06(1)     0.002(7)    0.007(8)    0.000(8)   
 C(23)  0.057(10)   0.057(10)   0.036(10)   -0.004(8)   -0.007(8)   0.016(7)   
 C(24)  0.046(9)    0.07(1)     0.037(10)   0.012(8)    0.005(8)    0.015(8)   
 C(25)  0.039(8)    0.049(9)    0.07(1)     -0.003(7)   0.011(8)    0.007(8)   
 C(31)  0.031(7)    0.047(9)    0.039(9)    -0.004(6)   0.013(6)    -0.001(6)  
 C(32)  0.042(8)    0.06(1)     0.04(1)     0.001(7)    0.010(7)    0.004(8)   
 C(33)  0.046(9)    0.056(10)   0.06(1)     0.000(7)    0.030(8)    -0.004(8)  
 C(34)  0.044(8)    0.06(1)     0.07(1)     0.023(8)    0.023(9)    0.017(10)  
 C(35)  0.05(1)     0.09(1)     0.05(1)     0.003(9)    0.008(8)    0.010(10)  
 C(36)  0.049(9)    0.06(1)     0.05(1)     0.009(8)    0.014(8)    0.009(8)   
 C(41)  0.035(8)    0.064(10)   0.039(10)   -0.007(7)   0.007(7)    -0.001(7)  
 C(42)  0.036(8)    0.07(1)     0.05(1)     -0.012(7)   0.007(7)    -0.014(8)  
 C(43)  0.050(8)    0.046(9)    0.05(1)     -0.008(7)   0.013(7)    0.005(8)   
 C(44)  0.07(1)     0.044(9)    0.05(1)     0.003(8)    0.010(8)    -0.007(8)  
 C(45)  0.06(1)     0.09(1)     0.039(10)   -0.026(10)  0.014(8)    -0.031(9)  
 C(46)  0.046(8)    0.045(9)    0.05(1)     -0.010(7)   0.019(8)    0.004(7)   
#------------------------------------------------------------------------------
_computing_data_collection            'PROCESS-AUTO'
_computing_cell_refinement            'PROCESS-AUTO'
_computing_data_reduction             'teXsan Ver. 1.11'
_computing_structure_solution          SIR92
_computing_structure_refinement       'SHELXL97'
_computing_publication_material       'teXsan Ver. 1.11'
_computing_molecular_graphics          ?
#------------------------------------------------------------------------------
_geom_special_details
;
 ?
;
loop_
_geom_bond_atom_site_label_1
_geom_bond_atom_site_label_2
_geom_bond_distance
_geom_bond_site_symmetry_1
_geom_bond_site_symmetry_2
_geom_bond_publ_flag
 Rh(1)     P(1)      2.236(4)   . . yes
 Rh(1)     N(1)      2.08(1)    . . yes
 Rh(1)     C(01)     1.83(1)    . . yes
 Rh(1)     C(2)      2.31(1)    . . yes
 Rh(2)     N(2)      1.94(1)    . . yes
 Rh(2)     N(3)      2.13(1)    . . yes
 Rh(2)     C(1)      2.01(2)    . . yes
 Rh(2)     C(02)     1.79(2)    . . yes
 P(1)      C(14)     1.87(1)    . . yes
 P(1)      C(31)     1.80(1)    . . yes
 P(1)      C(41)     1.84(1)    . . yes
 Si(1)     C(2)      1.83(2)    . . yes
 Si(1)     C(3)      1.85(2)    . . yes
 Si(1)     C(4)      1.89(2)    . . yes
 Si(1)     C(5)      1.85(2)    . . yes
 O(01)     C(01)     1.14(2)    . . yes
 O(02)     C(02)     1.20(2)    . . yes
 N(1)      N(2)      1.37(1)    . . yes
 N(1)      C(11)     1.37(2)    . . yes
 N(2)      C(13)     1.37(2)    . . yes
 N(3)      C(21)     1.36(2)    . . yes
 N(3)      C(25)     1.37(2)    . . yes
 C(1)      C(2)      1.22(2)    . . yes
 C(11)     C(12)     1.37(2)    . . yes
 C(11)     C(14)     1.51(2)    . . yes
 C(12)     C(13)     1.38(2)    . . yes
 C(13)     C(21)     1.45(2)    . . yes
 C(21)     C(22)     1.40(2)    . . yes
 C(22)     C(23)     1.36(2)    . . yes
 C(23)     C(24)     1.37(2)    . . yes
 C(24)     C(25)     1.35(2)    . . yes
 C(31)     C(32)     1.39(2)    . . yes
 C(31)     C(36)     1.39(2)    . . yes
 C(32)     C(33)     1.36(2)    . . yes
 C(33)     C(34)     1.40(2)    . . yes
 C(34)     C(35)     1.38(3)    . . yes
 C(35)     C(36)     1.41(2)    . . yes
 C(41)     C(42)     1.35(2)    . . yes
 C(41)     C(46)     1.42(2)    . . yes
 C(42)     C(43)     1.36(2)    . . yes
 C(43)     C(44)     1.41(2)    . . yes
 C(44)     C(45)     1.37(2)    . . yes
 C(45)     C(46)     1.39(2)    . . yes
#------------------------------------------------------------------------------
loop_
_geom_angle_atom_site_label_1
_geom_angle_atom_site_label_2
_geom_angle_atom_site_label_3
_geom_angle
_geom_angle_site_symmetry_1
_geom_angle_site_symmetry_2
_geom_angle_site_symmetry_3
_geom_angle_publ_flag
   P(1)      Rh(1)     N(1)      80.4(3)    . . . yes
   P(1)      Rh(1)     C(01)     90.6(5)    . . . yes
   P(1)      Rh(1)     C(2)      172.3(4)   . . . yes
   N(1)      Rh(1)     C(01)     170.2(6)   . . . yes
   N(1)      Rh(1)     C(2)      107.3(5)   . . . yes
   C(01)     Rh(1)     C(2)      81.7(6)    . . . yes
   N(2)      Rh(2)     N(3)      77.2(5)    . . . yes
   N(2)      Rh(2)     C(1)      88.4(5)    . . . yes
   N(2)      Rh(2)     C(02)     176.7(6)   . . . yes
   N(3)      Rh(2)     C(1)      165.5(5)   . . . yes
   N(3)      Rh(2)     C(02)     100.6(6)   . . . yes
   C(1)      Rh(2)     C(02)     93.7(6)    . . . yes
   Rh(1)     P(1)      C(14)     106.2(4)   . . . yes
   Rh(1)     P(1)      C(31)     116.1(5)   . . . yes
   Rh(1)     P(1)      C(41)     121.3(5)   . . . yes
   C(14)     P(1)      C(31)     104.7(7)   . . . yes
   C(14)     P(1)      C(41)     102.5(6)   . . . yes
   C(31)     P(1)      C(41)     104.1(6)   . . . yes
   C(2)      Si(1)     C(3)      108.1(8)   . . . yes
   C(2)      Si(1)     C(4)      113.7(7)   . . . yes
   C(2)      Si(1)     C(5)      106.7(7)   . . . yes
   C(3)      Si(1)     C(4)      108.2(7)   . . . yes
   C(3)      Si(1)     C(5)      112.0(7)   . . . yes
   C(4)      Si(1)     C(5)      108.3(8)   . . . yes
   Rh(1)     N(1)      N(2)      124.9(9)   . . . yes
   Rh(1)     N(1)      C(11)     127.0(9)   . . . yes
   N(2)      N(1)      C(11)     107(1)     . . . yes
   Rh(2)     N(2)      N(1)      131.8(9)   . . . yes
   Rh(2)     N(2)      C(13)     121.2(8)   . . . yes
   N(1)      N(2)      C(13)     106(1)     . . . yes
   Rh(2)     N(3)      C(21)     114.5(8)   . . . yes
   Rh(2)     N(3)      C(25)     127(1)     . . . yes
   C(21)     N(3)      C(25)     117(1)     . . . yes
   Rh(2)     C(1)      C(2)      178(1)     . . . yes
   Rh(1)     C(01)     O(01)     174(1)     . . . yes
   Rh(1)     C(2)      Si(1)     136.8(7)   . . . yes
   Rh(1)     C(2)      C(1)      87(1)      . . . yes
   Si(1)     C(2)      C(1)      135(1)     . . . yes
   Rh(2)     C(02)     O(02)     177(1)     . . . yes
   N(1)      C(11)     C(12)     110(1)     . . . yes
   N(1)      C(11)     C(14)     114(1)     . . . yes
   C(12)     C(11)     C(14)     134(1)     . . . yes
   C(11)     C(12)     C(13)     104(1)     . . . yes
   N(2)      C(13)     C(12)     110(1)     . . . yes
   N(2)      C(13)     C(21)     113(1)     . . . yes
   C(12)     C(13)     C(21)     135(1)     . . . yes
   P(1)      C(14)     C(11)     109(1)     . . . yes
   N(3)      C(21)     C(13)     113(1)     . . . yes
   N(3)      C(21)     C(22)     120(1)     . . . yes
   C(13)     C(21)     C(22)     126(1)     . . . yes
   C(21)     C(22)     C(23)     119(1)     . . . yes
   C(22)     C(23)     C(24)     120(1)     . . . yes
   C(23)     C(24)     C(25)     118(1)     . . . yes
   N(3)      C(25)     C(24)     123(1)     . . . yes
   P(1)      C(31)     C(32)     120.9(10)  . . . yes
   P(1)      C(31)     C(36)     121(1)     . . . yes
   C(32)     C(31)     C(36)     117(1)     . . . yes
   C(31)     C(32)     C(33)     121(1)     . . . yes
   C(32)     C(33)     C(34)     120(1)     . . . yes
   C(33)     C(34)     C(35)     120(1)     . . . yes
   C(34)     C(35)     C(36)     118(1)     . . . yes
   C(31)     C(36)     C(35)     121(1)     . . . yes
   P(1)      C(41)     C(42)     121(1)     . . . yes
   P(1)      C(41)     C(46)     118(1)     . . . yes
   C(42)     C(41)     C(46)     119(1)     . . . yes
   C(41)     C(42)     C(43)     122(1)     . . . yes
   C(42)     C(43)     C(44)     118(1)     . . . yes
   C(43)     C(44)     C(45)     120(1)     . . . yes
   C(44)     C(45)     C(46)     120(1)     . . . yes
   C(41)     C(46)     C(45)     118(1)     . . . yes
#------------------------------------------------------------------------------
loop_
_geom_torsion_atom_site_label_1
_geom_torsion_atom_site_label_2
_geom_torsion_atom_site_label_3
_geom_torsion_atom_site_label_4
_geom_torsion
_geom_torsion_site_symmetry_1
_geom_torsion_site_symmetry_2
_geom_torsion_site_symmetry_3
_geom_torsion_site_symmetry_4
_geom_torsion_publ_flag
 Rh(1)     P(1)      C(14)     C(11)     -12(1)     . . . . yes
 Rh(1)     P(1)      C(31)     C(32)     64(1)      . . . . yes
 Rh(1)     P(1)      C(31)     C(36)     -111(1)    . . . . yes
 Rh(1)     P(1)      C(41)     C(42)     -167(1)    . . . . yes
 Rh(1)     P(1)      C(41)     C(46)     10(1)      . . . . yes
 Rh(1)     N(1)      N(2)      Rh(2)     12(1)      . . . . yes
 Rh(1)     N(1)      N(2)      C(13)     -173.6(9)  . . . . yes
 Rh(1)     N(1)      C(11)     C(12)     173.8(10)  . . . . yes
 Rh(1)     N(1)      C(11)     C(14)     -13(1)     . . . . yes
 Rh(1)     C(2)      Si(1)     C(3)      -70(1)     . . . . yes
 Rh(1)     C(2)      Si(1)     C(4)      49(1)      . . . . yes
 Rh(1)     C(2)      Si(1)     C(5)      168(1)     . . . . yes
 Rh(1)     C(2)      C(1)      Rh(2)     54(56)     . . . . yes
 Rh(2)     N(2)      N(1)      C(11)     -176(1)    . . . . yes
 Rh(2)     N(2)      C(13)     C(12)     176.2(10)  . . . . yes
 Rh(2)     N(2)      C(13)     C(21)     -1(1)      . . . . yes
 Rh(2)     N(3)      C(21)     C(13)     -3(1)      . . . . yes
 Rh(2)     N(3)      C(21)     C(22)     175(1)     . . . . yes
 Rh(2)     N(3)      C(25)     C(24)     -177(1)    . . . . yes
 Rh(2)     C(1)      C(2)      Si(1)     -118(56)   . . . . yes
 P(1)      Rh(1)     N(1)      N(2)      173(1)     . . . . yes
 P(1)      Rh(1)     N(1)      C(11)     3(1)       . . . . yes
 P(1)      Rh(1)     C(01)     O(01)     -48(12)    . . . . yes
 P(1)      Rh(1)     C(2)      Si(1)     -3(3)      . . . . yes
 P(1)      Rh(1)     C(2)      C(1)      -175(2)    . . . . yes
 P(1)      C(14)     C(11)     N(1)      15(1)      . . . . yes
 P(1)      C(14)     C(11)     C(12)     -173(1)    . . . . yes
 P(1)      C(31)     C(32)     C(33)     177(1)     . . . . yes
 P(1)      C(31)     C(36)     C(35)     177(1)     . . . . yes
 P(1)      C(41)     C(42)     C(43)     174(1)     . . . . yes
 P(1)      C(41)     C(46)     C(45)     -177(1)    . . . . yes
 Si(1)     C(2)      Rh(1)     N(1)      172(1)     . . . . yes
 Si(1)     C(2)      Rh(1)     C(01)     -3(1)      . . . . yes
 O(01)     C(01)     Rh(1)     N(1)      -24(15)    . . . . yes
 O(01)     C(01)     Rh(1)     C(2)      131(13)    . . . . yes
 O(02)     C(02)     Rh(2)     N(2)      88(38)     . . . . yes
 O(02)     C(02)     Rh(2)     N(3)      136(37)    . . . . yes
 O(02)     C(02)     Rh(2)     C(1)      -40(37)    . . . . yes
 N(1)      Rh(1)     P(1)      C(14)     4.8(6)     . . . . yes
 N(1)      Rh(1)     P(1)      C(31)     -111.1(6)  . . . . yes
 N(1)      Rh(1)     P(1)      C(41)     120.9(6)   . . . . yes
 N(1)      Rh(1)     C(2)      C(1)      0(1)       . . . . yes
 N(1)      N(2)      Rh(2)     N(3)      173(1)     . . . . yes
 N(1)      N(2)      Rh(2)     C(1)      -8(1)      . . . . yes
 N(1)      N(2)      Rh(2)     C(02)     -138(8)    . . . . yes
 N(1)      N(2)      C(13)     C(12)     1(1)       . . . . yes
 N(1)      N(2)      C(13)     C(21)     -176(1)    . . . . yes
 N(1)      C(11)     C(12)     C(13)     -2(1)      . . . . yes
 N(2)      Rh(2)     N(3)      C(21)     2.0(10)    . . . . yes
 N(2)      Rh(2)     N(3)      C(25)     -179(1)    . . . . yes
 N(2)      Rh(2)     C(1)      C(2)      -51(56)    . . . . yes
 N(2)      N(1)      Rh(1)     C(01)     149(3)     . . . . yes
 N(2)      N(1)      Rh(1)     C(2)      -6(1)      . . . . yes
 N(2)      N(1)      C(11)     C(12)     2(1)       . . . . yes
 N(2)      N(1)      C(11)     C(14)     175(1)     . . . . yes
 N(2)      C(13)     C(12)     C(11)     0(1)       . . . . yes
 N(2)      C(13)     C(21)     N(3)      3(1)       . . . . yes
 N(2)      C(13)     C(21)     C(22)     -175(1)    . . . . yes
 N(3)      Rh(2)     N(2)      C(13)     0(1)       . . . . yes
 N(3)      Rh(2)     C(1)      C(2)      -43(57)    . . . . yes
 N(3)      C(21)     C(13)     C(12)     -173(1)    . . . . yes
 N(3)      C(21)     C(22)     C(23)     3(2)       . . . . yes
 N(3)      C(25)     C(24)     C(23)     1(2)       . . . . yes
 C(1)      Rh(2)     N(2)      C(13)     177(1)     . . . . yes
 C(1)      Rh(2)     N(3)      C(21)     -6(2)      . . . . yes
 C(1)      Rh(2)     N(3)      C(25)     172(2)     . . . . yes
 C(1)      C(2)      Rh(1)     C(01)     -176(1)    . . . . yes
 C(1)      C(2)      Si(1)     C(3)      99(1)      . . . . yes
 C(1)      C(2)      Si(1)     C(4)      -140(1)    . . . . yes
 C(1)      C(2)      Si(1)     C(5)      -21(2)     . . . . yes
 C(01)     Rh(1)     P(1)      C(14)     -179.2(7)  . . . . yes
 C(01)     Rh(1)     P(1)      C(31)     64.9(7)    . . . . yes
 C(01)     Rh(1)     P(1)      C(41)     -63.1(7)   . . . . yes
 C(01)     Rh(1)     N(1)      C(11)     -20(3)     . . . . yes
 C(2)      Rh(1)     P(1)      C(14)     -179(2)    . . . . yes
 C(2)      Rh(1)     P(1)      C(31)     64(2)      . . . . yes
 C(2)      Rh(1)     P(1)      C(41)     -63(2)     . . . . yes
 C(2)      Rh(1)     N(1)      C(11)     -175(1)    . . . . yes
 C(2)      C(1)      Rh(2)     C(02)     125(56)    . . . . yes
 C(02)     Rh(2)     N(2)      C(13)     48(9)      . . . . yes
 C(02)     Rh(2)     N(3)      C(21)     -175(1)    . . . . yes
 C(02)     Rh(2)     N(3)      C(25)     3(1)       . . . . yes
 C(11)     N(1)      N(2)      C(13)     -2(1)      . . . . yes
 C(11)     C(12)     C(13)     C(21)     177(1)     . . . . yes
 C(11)     C(14)     P(1)      C(31)     111(1)     . . . . yes
 C(11)     C(14)     P(1)      C(41)     -140(1)    . . . . yes
 C(12)     C(13)     C(21)     C(22)     8(2)       . . . . yes
 C(13)     C(12)     C(11)     C(14)     -173(1)    . . . . yes
 C(13)     C(21)     N(3)      C(25)     177(1)     . . . . yes
 C(13)     C(21)     C(22)     C(23)     -177(1)    . . . . yes
 C(14)     P(1)      C(31)     C(32)     -52(1)     . . . . yes
 C(14)     P(1)      C(31)     C(36)     131(1)     . . . . yes
 C(14)     P(1)      C(41)     C(42)     -49(1)     . . . . yes
 C(14)     P(1)      C(41)     C(46)     128(1)     . . . . yes
 C(21)     N(3)      C(25)     C(24)     1(2)       . . . . yes
 C(21)     C(22)     C(23)     C(24)     -1(2)      . . . . yes
 C(22)     C(21)     N(3)      C(25)     -3(2)      . . . . yes
 C(22)     C(23)     C(24)     C(25)     -1(2)      . . . . yes
 C(31)     P(1)      C(41)     C(42)     59(1)      . . . . yes
 C(31)     P(1)      C(41)     C(46)     -122(1)    . . . . yes
 C(31)     C(32)     C(33)     C(34)     6(2)       . . . . yes
 C(31)     C(36)     C(35)     C(34)     3(2)       . . . . yes
 C(32)     C(31)     P(1)      C(41)     -159(1)    . . . . yes
 C(32)     C(31)     C(36)     C(35)     2(2)       . . . . yes
 C(32)     C(33)     C(34)     C(35)     -1(2)      . . . . yes
 C(33)     C(32)     C(31)     C(36)     -6(2)      . . . . yes
 C(33)     C(34)     C(35)     C(36)     -3(2)      . . . . yes
 C(36)     C(31)     P(1)      C(41)     24(1)      . . . . yes
 C(41)     C(42)     C(43)     C(44)     4(2)       . . . . yes
 C(41)     C(46)     C(45)     C(44)     1(2)       . . . . yes
 C(42)     C(41)     C(46)     C(45)     0(2)       . . . . yes
 C(42)     C(43)     C(44)     C(45)     -2(2)      . . . . yes
 C(43)     C(42)     C(41)     C(46)     -3(2)      . . . . yes
 C(43)     C(44)     C(45)     C(46)     0(2)       . . . . yes
 C(43)     C(44)     C(45)     C(46)     0(2)       . . . . yes
#------------------------------------------------------------------------------
loop_
_geom_contact_atom_site_label_1
_geom_contact_atom_site_label_2
_geom_contact_distance
_geom_contact_site_symmetry_1
_geom_contact_site_symmetry_2
_geom_contact_publ_flag
 O(01)     O(01)     3.07(2)    . 3_756 ?
 O(01)     C(14)     3.31(2)    . 2_745 ?
 O(02)     C(34)     3.28(2)    . 1_455 ?
 O(02)     N(3)      3.32(2)    . 3_655 ?
 O(02)     C(21)     3.34(2)    . 3_655 ?
 O(02)     C(22)     3.41(2)    . 3_655 ?
 O(02)     C(25)     3.41(2)    . 3_655 ?
 O(02)     C(33)     3.49(2)    . 1_455 ?
 O(02)     C(23)     3.52(2)    . 3_655 ?
 O(02)     C(24)     3.54(2)    . 3_655 ?
 O(02)     C(3)      3.55(2)    . 2_655 ?
 N(1)      C(34)     3.42(2)    . 2_755 ?
 N(1)      C(43)     3.56(2)    . 2_745 ?
 N(1)      C(35)     3.60(2)    . 2_755 ?
 N(2)      C(43)     3.52(2)    . 2_745 ?
 N(3)      C(02)     3.48(2)    . 3_655 ?
 C(01)     C(14)     3.58(2)    . 2_745 ?
 C(02)     C(25)     3.27(2)    . 3_655 ?
 C(02)     C(24)     3.54(2)    . 3_655 ?
 C(11)     C(35)     3.50(2)    . 2_755 ?
 C(12)     C(35)     3.50(2)    . 2_755 ?
 C(33)     C(46)     3.45(2)    . 2_745 ?
#------------------------------------------------------------------------------
#===END
